# Supplementary material
Source: PubMed Central journal article supplement (PMC5027209)
Supplement: 10.1164_rccm.201510-2091OC_farhat_data_supplement.pdf [file 10.1164_rccm.201510-2091OC_farhat_data_supplement.pdf]

Genetic determinants of drug resistance in *Mycobacterium tuberculosis* and their diagnostic  
value

Maha R. Farhat, Razvan Sultana, Oleg Iartchouk , Sam Bozeman, James Galagan, Peter Sisk,  
Christian Stolte, Hanna Nebenzahl-Guimaraes, Karen Jacobson, Alexander Sloutsky,  
Devinder Kaur, James Posey, Barry N. Kreiswirth, Natalia Kurepina, Leen Rigouts,  
Elizabeth M. Streicher, Tommie C. Victor, Robin M Warren, Dick van Soolingen, and  
Megan Murray

ONLINE DATA SUPPLEMENT

## Supplementary Table 1: Culture, DST and fingerprinting methodology.

\* INH: isoniazid, RIF: rifampicin, EMB: ethambutol, PZA: pyrazinamide, STR: streptomycin, ETH: ethionamide, CIP: ciprofloxacin, LEVO: levofloxacin, OFLX: ofloxacin, AMK: amikacin, KAN: kanamycin, CAP: capreomycin, PAS: para-aminosalicylic acid, CYS: cycloserine \*\* FLQ drugs tested included CIP, LEVO, OFLX, MOXI, and GATI. Spoligo: spoligotyping

| Source                                                                  | Culture                                                                                                                                                                                                                                                                               | Colony purification | Drug Sensitivity Testing*                                                                                                                                                                                                                                                                                                                                    | Finger-printing   |
|-------------------------------------------------------------------------|---------------------------------------------------------------------------------------------------------------------------------------------------------------------------------------------------------------------------------------------------------------------------------------|---------------------|--------------------------------------------------------------------------------------------------------------------------------------------------------------------------------------------------------------------------------------------------------------------------------------------------------------------------------------------------------------|-------------------|
| <b>Stellenbosch University, South Africa</b>                            | BACTEC MGIT 960 system (BD Diagnostics Systems, Sparks, MD)                                                                                                                                                                                                                           | No                  | Indirect proportion method on Middlebrook 7H11 agar slants supplemented individually with: RIF (1.0 µg/ml), INH (0.2 µg/ml), EMB (7.5 µg/ml), OFLX (2.0 µg/ml), KAN (5.0 µg/ml), STR (2.0 µg/ml), AMK (5.0 µg/ml), CAP (10 µg/ml). PZA sensitivity was tested using the MGIT 960 system (100 µg/ml).                                                         | Spoligo/RFLP      |
| <b>Center for Disease Control, Atlanta, USA</b>                         | Middlebrook 7H9 broth supplemented with 10% (vol/vol) albumin-dextrose-catalase enrichment (Difco Laboratories) and 0.05% (vol/vol) Tween 80 (Sigma-Aldrich) at 37°C until they reached an approximate optical density at 600 nm of 1.0 (corresponding to 5 x 10 <sup>8</sup> CFU/ml) | No                  | Indirect proportion method on Middlebrook 7H10 agar plates supplemented individually with: RIF (1 µg/ml), INH (0.2, 1, and 5µg/ml), EMB (5 µg/ml), OFLX (2 µg/ml), CIP (2 µg/ml), STR (2.0 µg/ml) KAN (5 µg/ml), CAP (10 µg/ml), and AMI (4 µg/ml). PZA was tested using the BACTEC 460 (100 µg/ml), MGIT (100 µg/ml), or agar proportion (25 µg/ml) method. | Spoligo           |
| <b>Mass State Laboratory (source country Peru, Russia), Boston, USA</b> | Radiometric BACTEC 460 TB system (Becton-Dickinson)                                                                                                                                                                                                                                   | No                  | Indirect proportion method on Middlebrook 7H10 agar plates supplemented with : INH ( 0.2, 1, and 5 µg/mL), RIF (1 µg/mL), EMB (5 µg/mL), STR (2 and 10 µg/mL), KAN (5 µg/mL), CAP (10 µg/mL), ETH (5 µg/mL), CYS (30 µg/mL), PAS (1 µg/mL), AMK (6 µg/mL), LEVO (1 µg/mL), OFLX (2 µg/mL), and CIP (2 µg/mL). PZA was tested using the BACTEC (100 µg/mL).   | Spoligo           |
| <b>Public Health Research Institute, Rutgers University, Newark, NJ</b> | Lowenstein-Jensen slant culture                                                                                                                                                                                                                                                       | No                  | Indirect agar proportion method on Middlebrook 7H10 agar plates containing the following drugs: RIF (1 µg/ml), INH (0.2, 1, and 5µg/ml), EMB (5 µg/ml), CIP (2 µg/ml), STR (2µg/ml), KAN (5 µg/ml), CAP (10µg/ml)                                                                                                                                            | Spoligo/RFLP      |
| <b>RVIM, Netherlands</b>                                                | MGIT and Middlebrook 7H10 solid                                                                                                                                                                                                                                                       | No                  | MGIT INH (0.2 µg/mL), RIF (1 µg/mL), RFB (2 µg/mL), EMB (5 µg/mL), STR (5 µg/mL), ETH (5 µg/mL), CYS (50 µg/mL), PRO (5 µg/mL), AMK (5 µg/mL), CLO (2 µg/mL), and CIP (2 µg/mL). PZA (50 µg/mL), CLARI (>16 µg/mL), PAS (1 µg/mL).                                                                                                                           | Spoligo/MIRU-VNTR |
| <b>WHO/TDR, Belgium</b>                                                 | Dubos Agar then Lowenstein-Jensen slant culture                                                                                                                                                                                                                                       | Yes                 | Indirect proportions method on two different media: On LJ for INH (0.2 µg/ml), RIF (40 µg/ml), EMB (2µg/ml),STR (4 µg/ml),PAS(0.5 µg/ml); on Middlebrook 7H11 agar for OFLX (2µg/ml), KAN (6µg/ml), CAP (10µg/ml).                                                                                                                                           |                   |

## Supplementary Table 2: List of genes and non-coding regions targeted by MIPs.

Listed are the accompanying gene symbol, description, drug resistance association, the H37Rv identifier, the strand, the start and end coordinates in H37Rv genome and the length in nucleotides.

| Gene                            | Description                                           | Drug resistance association       | ID (H37Rv) | Strand | Start   | End     | Length |
|---------------------------------|-------------------------------------------------------|-----------------------------------|------------|--------|---------|---------|--------|
| <b>promoter</b><br><i>ahpC</i>  |                                                       | Isoniazid                         | -          | +      | 2726088 | 2726192 | 105    |
| <i>ahpC</i>                     | alkyl hydroperoxide reductase C protein               | Isoniazid                         | Rv2428     | +      | 2726193 | 2726780 | 588    |
| <i>alr</i>                      | alanine racemase                                      | Cycloserine                       | Rv3423c    | -      | 3840194 | 3841420 | 1227   |
| <i>ddl</i>                      | D-alanine-D-alanine ligase ddIA                       | Cycloserine                       | Rv2981c    | -      | 3336796 | 3337917 | 1122   |
| <i>embA</i>                     | membrane indolylacetylinoitol arabinosyltransferase A | Ethambutol                        | Rv3794     | +      | 4243233 | 4246517 | 3285   |
| <i>embB</i>                     | membrane indolylacetylinoitol arabinosyltransferase B | Ethambutol, Isoniazid, Rifampicin | Rv3795     | +      | 4246514 | 4249810 | 3297   |
| <i>embC</i>                     | membrane indolylacetylinoitol arabinosyltransferase C | Ethambutol                        | Rv3793     | +      | 4239863 | 4243147 | 3285   |
| <i>ethA</i>                     | monooxygenase                                         | Ethionamide                       | Rv3854c    | -      | 4326004 | 4327473 | 1470   |
| <i>gidB</i>                     | glucose-inhibited division protein B                  | Streptomycin                      | Rv3919c    | -      | 4407528 | 4408202 | 675    |
| <i>gyrA</i>                     | DNA gyrase subunit A                                  | Fluoroquinolones                  | Rv0006     | +      | 7302    | 9818    | 2517   |
| <i>gyrB</i>                     | DNA gyrase subunit B                                  | Fluoroquinolones                  | Rv0005     | +      | 5123    | 7267    | 2145   |
| <i>inhA</i>                     | NADH-dependent enoyl-[acyl-carrier-protein] reductase | Ethionamide, Isoniazid            | Rv1484     | +      | 1674202 | 1675011 | 810    |
| <i>iniA</i>                     | isoniazid inducible gene protein A                    | Ethambutol, Isoniazid             | Rv0342     | +      | 410838  | 412760  | 1923   |
| <i>iniB</i>                     | isoniazid inducible gene protein B                    | Ethambutol, Isoniazid             | Rv0341     | +      | 409362  | 410801  | 1440   |
| <i>iniC</i>                     | isoniazid inducible gene protein C                    | Ethambutol, Isoniazid             | Rv0343     | +      | 412757  | 414238  | 1482   |
| <i>kasA</i><br>( <i>fabF1</i> ) | 3-oxoacyl-[acyl-carrier protein] synthase 1           | Isoniazid                         | Rv2245     | +      | 2518115 | 2519365 | 1251   |

|                                       |                                                                                        |                             |          |   |         |         |              |
|---------------------------------------|----------------------------------------------------------------------------------------|-----------------------------|----------|---|---------|---------|--------------|
| <b><i>katG</i></b>                    | catalase-peroxidase-<br>peroxynitritase T                                              | Isoniazid                   | Rv1908c  | - | 2153889 | 2156111 | 2223         |
| <b>promoter<br/><i>mabA</i></b>       |                                                                                        | Isoniazid                   | -        | + | 1673300 | 1673439 | 140          |
| <b><i>mabA</i><br/>(<i>fabG1</i>)</b> | 3-oxoacyl-[acyl-carrier protein]<br>reductase (mycolic acid<br>biosynthesis protein A) | Ethionamide,<br>Isoniazid   | Rv1483   | + | 1673440 | 1674183 | 744          |
| <b><i>ndh</i></b>                     | NADH dehydrogenase                                                                     | Isoniazid                   | Rv1854c  | - | 2101651 | 2103042 | 1392         |
| <b><i>oxyR'</i></b>                   | oxidative-stress regulatory<br>gene (pseudogene)                                       | Isoniazid?                  | Rv2427Ac | - | 2725571 | 2726087 | 517          |
| <b><i>pncA</i></b>                    | pyrazinamidase/nicotinamidase                                                          | Pyrazinamide                | Rv2043c  | - | 2288681 | 2289241 | 561          |
| <b><i>rpoB</i></b>                    | DNA-directed RNA polymerase<br>beta chain                                              | Rifampicin                  | Rv0667   | + | 759807  | 763325  | 3519         |
| <b><i>rpsL</i></b>                    | 30S ribosomal protein S12                                                              | Streptomycin                | Rv0682   | + | 781560  | 781934  | 375          |
| <b><i>rrl</i></b>                     | ribosomal RNA 23S                                                                      | Aminoglycosides             | Rvnr02   | + | 1473658 | 1476795 | 3138         |
| <b><i>rrs</i></b>                     | ribosomal RNA 16S                                                                      | Aminoglycosides             | Rvnr01   | + | 1471846 | 1473382 | 1537         |
| <b><i>thyA</i></b>                    | thymidylate synthase                                                                   | Para-aminosalicylic<br>acid | Rv2764c  | - | 3073680 | 3074471 | 792          |
| <b><i>tlyA</i></b>                    | cytotoxin haemolysin                                                                   | Capreomycin                 | Rv1694   | + | 1917940 | 1918746 | 807          |
| <b>Total length</b>                   |                                                                                        |                             |          |   |         |         | <b>42367</b> |

### Supplementary Table 3: Sequence and coordinates of the molecular inversion probes used for target sequence capture.

Some probes are duplicates except for one SNP in one of the arms.

BRIDGE = AGATCGGAAGAGCGTCGTGTAGGGAAAGCTGAGCAAATGTTATCGAGGTC

| #   | Probe name        | Start   | End Sequence                                                         |
|-----|-------------------|---------|----------------------------------------------------------------------|
| 1.  | embA-embB_W_1_1   | 4243003 | 4243142 TCCGGCGCCGTTGCGCCGC-(BRIDGE)-CTACCTCAAAGACGACTGGTTTAGGGACTG  |
| 2.  | embA-embB_W_2_2   | 4243143 | 4243282 CGGATCGCACGCCTAGCAGC-(BRIDGE)-GCTAGAAGTCCGCTGGCCACC          |
| 3.  | embA-embB_W_3_1   | 4243283 | 4243422 CCCAGTACCCGCCCTCTGGTAT-(BRIDGE)-CGTCGTCTCGGGAATCGCGGG        |
| 4.  | embA-embB_W_4_2   | 4243423 | 4243562 GGCTGTCGTCGCCGCCAAC-(BRIDGE)-CCGGGGCCACGCGCGCTG              |
| 5.  | embA-embB_W_5_1   | 4243563 | 4243702 GGGCGCTGATTTTATGGGTATACCCGG-(BRIDGE)-CAGGACACGGTCTGCTGGC     |
| 6.  | embA-embB_W_6_2   | 4243703 | 4243842 GACGCCCGCGCGCTCAAGA-(BRIDGE)-CGGCGCCGGACCCCTGCCGC            |
| 7.  | embA-embB_W_7_1   | 4243843 | 4243982 TGCGGGTCCGATTCGCCAGC-(BRIDGE)-AGGCCGTGATGCTCTCCGGC           |
| 8.  | embA-embB_W_8_2   | 4243983 | 4244122 CCGGCTATGTAGCCAACTACTACCGGTATTT-(BRIDGE)-CGGCTCGTGACGCAGCGGT |
| 9.  | embA-embB_W_9_1   | 4244123 | 4244262 GCTGATCGTCAGCCGTTCTGTGC-(BRIDGE)-CGGCACGACGGAGGCCCGCT        |
| 10. | embA-embB_W_10_2  | 4244263 | 4244402 TGATCGCGCTGGGTGTGCTG-(BRIDGE)-TGCGCGGCTGGGACCGGGC            |
| 11. | embA-embB_W_11_1  | 4244403 | 4244542 CCGCTGCTGACTGGTGCAGC-(BRIDGE)-GTCAGTGGGTGTTGGTGAACG          |
| 12. | embA-embB_W_12_2  | 4244543 | 4244682 CACGGTGGCCGAATCCGGAC-(BRIDGE)-CGCCATCGCCAGAGGATCCG           |
| 13. | embA-embB_W_13_1  | 4244683 | 4244822 GTGTTGCTGTTCTGCCTGTTCCGG-(BRIDGE)-GCATCAAGTACAAGGTCGGCCCG    |
| 14. | embA-embB_W_14_2  | 4244823 | 4244962 GCCGTGCAGTTCGCCGATT-(BRIDGE)-GTGCTGTTCTGCTGCTGCCG            |
| 15. | embA-embB_W_15_1  | 4244963 | 4245102 GCAACCTCGGGCATCAACGGGT-(BRIDGE)-CGCCGGGCTGGCCGGGGTGT         |
| 16. | embA-embB_W_15_1a | 4244963 | 4245102 GCAACCTCGGGCATCAACGGGT-(BRIDGE)-CGCCGGGCTGGCCGGGGTGT         |
| 17. | embA-embB_W_16_2  | 4245103 | 4245242 GCCTGGTATCACTCCGGATGACTAC-(BRIDGE)-GGTCTACGTCGGCAACTACGGGG   |
| 18. | embA-embB_W_17_1  | 4245243 | 4245382 CGGTGTTCCGTTACCCGCTTTACAC-(BRIDGE)-GCCGGGCACACCGAAGTCAA      |
| 19. | embA-embB_W_18_2  | 4245383 | 4245522 GTTCGGACCCGACGGACCGC-(BRIDGE)-CACCCCAAGGCCAACCTGAC           |
| 20. | embA-embB_W_19_1  | 4245523 | 4245662 CCGCATCACCGACTCCGCG-(BRIDGE)-TGGGCGGTATCAGTCCCGTGC           |
| 21. | embA-embB_W_20_2  | 4245663 | 4245802 ACGGCCACTCGGCTGGTA-(BRIDGE)-GGCACCCGGAGGGAAAGGG              |
| 22. | embA-embB_W_21_1  | 4245803 | 4245942 CGTACCAGCCCGACGGCC-(BRIDGE)-CCAGTTACCCCCCGCAGCC              |
| 23. | embA-embB_W_22_2  | 4245943 | 4246082 GCCTATGACCCGAACCTGAGCCCT-(BRIDGE)-GCATCAGCCACTGGGGCAG        |
| 24. | embA-embB_W_23_1  | 4246083 | 4246222 CCAGCGACCGTTTTCCGAGCATCT-(BRIDGE)-GAGCAATGGTTCGCTTACCC       |
| 25. | embA-embB_W_24_2  | 4246223 | 4246362 GGCACCTCGACGATCGCA-(BRIDGE)-CGCATTGCCGAGTTCGGC               |
| 26. | embA-embB_W_25_1  | 4246363 | 4246502 GGGGTCCGCCAGGACCGATC-(BRIDGE)-CGTACCTCGTGGGGACTGGT           |
| 27. | embA-embB_W_26_2  | 4246503 | 4246642 TGGCTTTGTGTTGTCGGTGCGC-(BRIDGE)-AGGGCGCTGCCATGACAGT          |
| 28. | embA-embB_W_27_1  | 4246643 | 4246782 CCGTCCGACGTGGTGCAGCGC-(BRIDGE)-ACGCCGCTGCTGCCCTGT            |
| 29. | embA-embB_W_28_2  | 4246783 | 4246922 GTGGTGTCTGTCCGTGCCGC-(BRIDGE)-CATGCCACCCCGGGCGGG             |
| 30. | embA-embB_W_29_1  | 4246923 | 4247062 CCGACCCCAACTCGCCCG-(BRIDGE)-GCGAGCAGGTGACGTCCCG              |
| 31. | embA-embB_W_30_2  | 4247063 | 4247202 GGGGCGATCGTGGCCACCGT-(BRIDGE)-CAGATTGTCGGGGTGTCCACGACC       |
| 32. | embA-embB_W_31_1  | 4247203 | 4247342 GGCAAGCTGGCGCACCTTCA-(BRIDGE)-CGTCGACTGATCGGTTGTGG           |
| 33. | embA-embB_W_32_2  | 4247343 | 4247482 GGCTACATGTTCCAATTTCCGCTGGTTC-(BRIDGE)-CCCTGACCCGACCGCTGGTG   |
| 34. | embA-embB_W_33_1  | 4247483 | 4247622 GCTGCTGTCGCTGAGGTGCT-(BRIDGE)-GGCAGCCCGGAGGATCCCTT           |
| 35. | embA-embB_W_33_1a | 4247483 | 4247622 GCTGCTGTCGCTGAGGTGCT-(BRIDGE)-GGCAGCCCGGAGGTTCCCTT           |
| 36. | embA-embB_W_33_1b | 4247483 | 4247622 GCTGCTGTCGCTGAGGTGCT-(BRIDGE)-GGCAGCCCGGAGGATCCCTT           |
| 37. | embA-embB_W_34_2  | 4247623 | 4247762 GCTCGCTCGCTGGTACCTATG-(BRIDGE)-GCCCGCTCGGCCGGCGG             |
| 38. | embA-embB_W_35_1  | 4247763 | 4247902 CCGCGCCGCCCGGCTGCTG-(BRIDGE)-TGCTGATCGAGCGTCCATCGC           |
| 39. | embA-embB_W_35_1a | 4247763 | 4247902 CAGGCGCCGCCGATGCTG-(BRIDGE)-TGCTGATCGAGCGTCCATCGC            |
| 40. | embA-embB_W_36_2  | 4247903 | 4248042 GAAGCCACAGGGTTCGCGC-(BRIDGE)-CGGATCTGGTGCAGCGTCAATC          |
| 41. | embA-embB_W_37_1  | 4248043 | 4248182 GCCTGTTACCCGCGTGTTCATCA-(BRIDGE)-CAAATCGGGCCGAGCCAGGC        |
| 42. | embA-embB_W_38_2  | 4248183 | 4248322 GGCTGTTCCGCCCGTAGGG-(BRIDGE)-TGTTGCGGCAAGCGAATCC             |
| 43. | embA-embB_W_38_2a | 4248183 | 4248322 GGCTGTTCCGCCCGTAGGG-(BRIDGE)-TGTTGCGGCAAGCGAATCC             |
| 44. | embA-embB_W_39_1  | 4248323 | 4248462 CCACCAACGGCTGGTGTATGCTC-(BRIDGE)-GCGGCGATGGCCGCTGAC          |
| 45. | embA-embB_W_40_2  | 4248463 | 4248602 CCGCGCCGCCGCGAAGGGC-(BRIDGE)-CAGCTACGGTGTGCCGTTCAACAG        |
| 46. | embA-embB_W_41_1  | 4248603 | 4248742 GGTCCAACGTGCGGGCGTTT-(BRIDGE)-GGCTGATCCGCGCTGACG             |
| 47. | embA-embB_W_42_2  | 4248743 | 4248882 AACCCGCTCGGTTTACGCC-(BRIDGE)-GTCGGCGCTGCGGACTGGC             |
| 48. | embA-embB_W_43_1  | 4248883 | 4249022 GGTGCGCTGCCCTATGGGC-(BRIDGE)-CAACGCGTACCGGAACACAG            |
| 49. | embA-embB_W_44_2  | 4249023 | 4249162 TGACCCCGCGGGCAAGATC-(BRIDGE)-TCGATCCCGCCGGTACCG              |
| 50. | embA-embB_W_45_1  | 4249163 | 4249302 GAGCAGCCAAAGCGTGCGC-(BRIDGE)-GCCGGCAACAGCGTCTGCA             |
| 51. | embA-embB_W_46_2  | 4249303 | 4249442 GGACCTGCGCTACTGCAGGAAT-(BRIDGE)-CAACCTGCGCTTCCGCCGAG         |
| 52. | embA-embB_W_47_1  | 4249443 | 4249582 CACCGACTACTCGGCTAAGAAGCTG-(BRIDGE)-ATGTGGGCTCGACGACGCGG      |
| 53. | embA-embB_W_48_2  | 4249583 | 4249722 CCCTGCGCAAGTTCGACACCT-(BRIDGE)-GACACCGACAGTGGGAAGACGG        |
| 54. | embA-embB_W_48_2a | 4249583 | 4249722 CCCTGCGCAAGTTCGACACCT-(BRIDGE)-AACACCGACAGTGGGAAGACGG        |
| 55. | embA-embB_W_49_1  | 4249723 | 4249862 CGATGTTCTGCTATTAGACGGCCCA-(BRIDGE)-GGTCTGATCCCTCCCGCC        |
| 56. | embA-embB_W_50_2  | 4249863 | 4250002 GCAGGGGTGTTGGCGCGTC-(BRIDGE)-TCAGTTAGGCTCTATGCTGCTGG         |
| 57. | embA-embB_C_1_2   | 4243053 | 4243192 GGGCGTGGGGTAGTAAGGGC-(BRIDGE)-TGCGGGCCGGAGGTTGT              |
| 58. | embA-embB_C_2_1   | 4243193 | 4243332 CGCGGTTAAGGGCGGTGAGGA-(BRIDGE)-GCAGCGGAACGATGCCGCAC          |
| 59. | embA-embB_C_3_2   | 4243333 | 4243472 GCGGTGGTTGGTTACCCGGAA-(BRIDGE)-GGCGATGGCCGACGAGGGGA          |

| # Probe name           | Start   | End Sequence                                                        |
|------------------------|---------|---------------------------------------------------------------------|
| 60. embA-embB_C_3_2a   | 4243333 | 4243472 GCGGTGGTCTGGTTACCCGGAA-(BRIDGE)-GGCGATGGCCGAGCAGGGGA        |
| 61. embA-embB_C_3_2b   | 4243333 | 4243472 GCGGTGGTGGTTACCCGGAA-(BRIDGE)-GGCGATGGCCGAAACAGGGGA         |
| 62. embA-embB_C_4_1    | 4243473 | 4243612 CCGCGTTGGCGGGCAGCGT-(BRIDGE)-GCCGCCACCCGGCCACCGA            |
| 63. embA-embB_C_5_2    | 4243613 | 4243752 CCGCTGCGATCGTGGAGCGG-(BRIDGE)-AGATGCCGCCAACCTGTGGCT         |
| 64. embA-embB_C_6_1    | 4243753 | 4243892 GCTCCGACTTACAGTTCGGTGA-(BRIDGE)-CCCCACCATGGCTACCAAGGACC     |
| 65. embA-embB_C_7_2    | 4243893 | 4244032 AGCCGGTCCAGCGCGGCCAG-(BRIDGE)-ATGACATGCCAGAGCAACAAGTCCG     |
| 66. embA-embB_C_8_1    | 4244033 | 4244172 CATCGGACGAGGTGGCGCCG-(BRIDGE)-GCTGGGCAAGCACCAGTGTATACCA     |
| 67. embA-embB_C_9_2    | 4244173 | 4244312 GGCGGTGCTACCCGCCCA-(BRIDGE)-AGCGACCCGGTTGGACGCCA            |
| 68. embA-embB_C_10_1   | 4244313 | 4244452 ACCGCACCAGCGGTGAACAC-(BRIDGE)-GGGGCCAGCCGTCGAGCGC           |
| 69. embA-embB_C_11_2   | 4244453 | 4244592 CGATGATGGTACCAGCGCC-(BRIDGE)-CCAGCAGTCCATCGGTCGCC           |
| 70. embA-embB_C_12_1   | 4244593 | 4244732 GCCAGCACCAGCGCGG-(BRIDGE)-CAGGAAGTCTGTACCAGGCGATG           |
| 71. embA-embB_C_13_2   | 4244733 | 4244872 GCTTCCACGGTAAGGAAGTAGTAGCG-(BRIDGE)-CCGCTGGCCAGCCCGCCAC     |
| 72. embA-embB_C_14_1   | 4244873 | 4245012 CGATCAGTCGCCAGCCGGG-(BRIDGE)-GGGCAAAGGTGAACCGGTGA           |
| 73. embA-embB_C_15_2   | 4245013 | 4245152 GGTGCGTCACTATGTAGACCGATGC-(BRIDGE)-GACGGGCTGGATGTCATACCAGG  |
| 74. embA-embB_C_16_1   | 4245153 | 4245292 GTCACCGGTGGCTGGCGAT-(BRIDGE)-GAGGCCAAGATGCGGTTGCGC          |
| 75. embA-embB_C_17_2   | 4245293 | 4245432 GCGACCACAGCAGTGGCGTA-(BRIDGE)-CACAGCTGGACAGCCGGTGC          |
| 76. embA-embB_C_18_1   | 4245433 | 4245572 CAGCACGTCGTCGCCATCG-(BRIDGE)-GTCCTCGCCACGCCCTCGG            |
| 77. embA-embB_C_19_2   | 4245573 | 4245712 GAGACCAGCGGTGGACTGAG-(BRIDGE)-GCCGCTGGACCCGTTGAT            |
| 78. embA-embB_C_20_1   | 4245713 | 4245852 GGGTCCAATCCGAACGGCAGC-(BRIDGE)-CCGCGGAAACCACCCAGC           |
| 79. embA-embB_C_21_2   | 4245853 | 4245992 TGTAGGACCAGATGGCGCCG-(BRIDGE)-GGGTTGCGGTCCGATGTCGATCG       |
| 80. embA-embB_C_22_1   | 4245993 | 4246132 AACCGCAGATGGCCACGC-(BRIDGE)-AGAGATTCCAGCACCAGCAACCCG        |
| 81. embA-embB_C_23_2   | 4246133 | 4246272 GCTGACCCGATCAACCGTGC-(BRIDGE)-TCTGCTTGTGGTCCGGCAGGA         |
| 82. embA-embB_C_24_1   | 4246273 | 4246412 TAGGTTGACGACGCGCGCG-(BRIDGE)-GTACTGCTCCAGGATCCCGATC         |
| 83. embA-embB_C_25_2   | 4246413 | 4246552 TCGCCCGGACACCGCGTG-(BRIDGE)-ATTTGGGTTGCTTTGCGTCTGCT         |
| 84. embA-embB_C_26_1   | 4246553 | 4246692 GCAAAGCCCAAAATCGCCG-(BRIDGE)-TGTGCCAGTCGAGCATCGCG           |
| 85. embA-embB_C_27_2   | 4246693 | 4246832 CGCTGCCAGTGGCCCGC-(BRIDGE)-TGCCTGCTTGGGTGCGGTG              |
| 86. embA-embB_C_28_1   | 4246833 | 4246972 AACGCTGCAAAATGGCGTCT-(BRIDGE)-GGTAGAGGTGACCTCGATGCGTTGA     |
| 87. embA-embB_C_29_2   | 4246973 | 4247112 TTGGCGAAGGTGCGCGGTG-(BRIDGE)-AGCCCGGCGCGCGGGCC              |
| 88. embA-embB_C_29_2a  | 4246973 | 4247112 TTGGCGAAGGTGCGCGGTG-(BRIDGE)-AGGCGGGCGCGCGGGCC              |
| 89. embA-embB_C_30_1   | 4247113 | 4247252 CGATGTCGCCGAGACCGCC-(BRIDGE)-AGCCCCCGCTCAACTGG              |
| 90. embA-embB_C_31_2   | 4247253 | 4247392 GCCTGAGGAGGAGCTGGGCAATTG-(BRIDGE)-GATGACATGCCAGAGCAGGAAGCCG |
| 91. embA-embB_C_32_1   | 4247393 | 4247532 TCGTCCGACGAATTCGCGCC-(BRIDGE)-ATCAGCGCCAGCAGGTTGTAATACCA    |
| 92. embA-embB_C_33_2   | 4247533 | 4247672 CTGGCTGCTGACATGGGTC-(BRIDGE)-CCGCCAGTAGCGGGTTTG             |
| 93. embA-embB_C_33_2a  | 4247533 | 4247672 ATGGCTGCTGACATGGGTC-(BRIDGE)-CCGCCAGTAGCGGGTTTG             |
| 94. embA-embB_C_34_1   | 4247673 | 4247812 CGGTACGAAGACCATGGCCG-(BRIDGE)-CAGCGCCCGGTGTGAGCC            |
| 95. embA-embB_C_35_2   | 4247813 | 4247952 AATGCGCGGTAACGACGGC-(BRIDGE)-GACACCAACGGCAACGTGCC           |
| 96. embA-embB_C_36_1   | 4247953 | 4248092 TGCCGCGGCCACATCGGC-(BRIDGE)-AGTAGTAACGCAGGTTCTCGGTATACCAG   |
| 97. embA-embB_C_37_2   | 4248093 | 4248232 CGAGGTTGGCAGGATGAGGT-(BRIDGE)-CCGCCACCGGTCCGCGGG            |
| 98. embA-embB_C_37_2a  | 4248093 | 4248232 CGAGGTTGGCAGGATGAGGT-(BRIDGE)-CCGCCACCGGTCCGCGGG            |
| 99. embA-embB_C_38_1   | 4248233 | 4248372 GTGCCGAAGATGACGCCATCAG-(BRIDGE)-CGCAGCACCAGTGGGATACCA       |
| 100. embA-embB_C_39_2  | 4248373 | 4248512 CCATCCGGTTCGCGACACAG-(BRIDGE)-TGATCCGTCGATCTTCGGCATCG       |
| 101. embA-embB_C_40_1  | 4248513 | 4248652 ACAGGGCGAAAAGATTGTGCTGACTG-(BRIDGE)-GAAACCGGCCACGATCGGTACCG |
| 102. embA-embB_C_41_2  | 4248653 | 4248792 GGCAGCAACACCCGCCAT-(BRIDGE)-TTGGTATCAGGCTCAGCAGTACGCTCG     |
| 103. embA-embB_C_42_1  | 4248793 | 4248932 CAGCGGCTCATGAAACCCGCA-(BRIDGE)-TGGGTTTCATCAGATCGCTCGG       |
| 104. embA-embB_C_43_2  | 4248933 | 4249072 GTAGTCGGTGGCGGCTGGT-(BRIDGE)-CTGTGCCCGGTGGTGTAGG            |
| 105. embA-embB_C_44_1  | 4249073 | 4249212 GCCGAGACGAGTGTGCTGTTG-(BRIDGE)-AGCACCACAGTCTGCCCGGG         |
| 106. embA-embB_C_45_2  | 4249213 | 4249352 GGTCCCGCATGGCGTATTG-(BRIDGE)-GGACCGCAGCGCATCGGCG            |
| 107. embA-embB_C_46_1  | 4249353 | 4249492 ACAGATCTCGGCCACACCC-(BRIDGE)-GGCCAAACCGACGCCCACT            |
| 108. embA-embB_C_47_2  | 4249493 | 4249632 ATCGGCTGCTGGCACGGAA-(BRIDGE)-GTGATCCCGAGCAGGCCCC            |
| 109. embA-embB_C_48_1  | 4249633 | 4249772 GGGCCCGCAGCAACAGTTCG-(BRIDGE)-CGTGGCGGTGCGGTGCC             |
| 110. embA-embB_C_49_2  | 4249773 | 4249912 CTTGCCCGTTCACACAGGC-(BRIDGE)-CCAACATGGCCGCTGGTG             |
| 111. gyrB-gyrA_W_1_1   | 4973    | 5112 CAGGAAGAAAGATGTCGACGACG-(BRIDGE)-GGGTCCGCGGACACCTACG           |
| 112. gyrB-gyrA_W_2_2   | 5113    | 5252 TTCGGATCGTGGCTGCCAGA-(BRIDGE)-GCGCGTTAGATGGGTAACAGGAGG         |
| 113. gyrB-gyrA_W_3_1   | 5253    | 5392 ACCATCTCATTTGGGAGTGGTGCAG-(BRIDGE)-AAAAGAAGGCCAAAGCAATACGGCG   |
| 114. gyrB-gyrA_W_4_2   | 5393    | 5532 CGGCATACCGACCGTCGAGCT-(BRIDGE)-AACCGGTTCGACGAGGCGAT            |
| 115. gyrB-gyrA_W_4_2a  | 5393    | 5532 CGGCATACCGACCGTCGAGCT-(BRIDGE)-AACCGGTTCGACGAGGCGAT            |
| 116. gyrB-gyrA_W_5_1   | 5533    | 5672 CGAGTCAAGCTGACGGGTACG-(BRIDGE)-GGTATGACACAACATACATGCCCGC       |
| 117. gyrB-gyrA_W_6_2   | 5673    | 5812 GGAATACGACTCGAACCGTCCG-(BRIDGE)-AGTGGTCTCAGGTTTATGAGAAGTCGGAAC |
| 118. gyrB-gyrA_W_7_1   | 5813    | 5952 TCGGCAAGTGAACGCGCAGC-(BRIDGE)-CGCCGGTGCAGAGATGGC               |
| 119. gyrB-gyrA_W_8_2   | 5953    | 6092 TTCCGGCAAGGGCACCGGG-(BRIDGE)-CGAATCCACTGCACCGCAAAAGT           |
| 120. gyrB-gyrA_W_9_1   | 6093    | 6232 GCTGACGTCGGTGGTGAACAAGTAC-(BRIDGE)-ACGAGTGGAGATCGCGATGCA       |
| 121. gyrB-gyrA_W_10_2  | 6233    | 6372 CAGACCAAGACCAAGTTGGGAACAC-(BRIDGE)-GCCAAGGACCGCAAGCTACTGAAG    |
| 122. gyrB-gyrA_W_10_2a | 6233    | 6372 CAGACCAAGACCAAGTTGGGAACAC-(BRIDGE)-GCCAAGGACCGCAAGCTACTGAAG    |
| 123. gyrB-gyrA_W_11_1  | 6373    | 6512 CGCGGACGTAAGGCACGAG-(BRIDGE)-CGAGGTCAAATCGTTTGTGAGAAGGTC       |
| 124. gyrB-gyrA_W_12_2  | 6513    | 6652 CGGTTCTGAAAAAGCGGTGCG-(BRIDGE)-AGTTGGTGGCGGTAAGAGCG            |
| 125. gyrB-gyrA_W_13_1  | 6653    | 6792 CCGGGATCCAGCAGGATTCGA-(BRIDGE)-GATTCGATGTTCCAGGCGATACTCCCG     |

| # Probe name           | Start | End Sequence                                                         |
|------------------------|-------|----------------------------------------------------------------------|
| 126. gyrB-gyrA_W_14_2  | 6793  | 6932 CGAGAACGGGCATGTGTTTTGGCAC-(BRIDGE)-TATCGGCAAGCTGCGCTACCACA      |
| 127. gyrB-gyrA_W_15_1  | 6933  | 7072 GGAAGACGGCATTACGCGGTACAAG-(BRIDGE)-AACCGCCGCTGTACAACTCAAGTG     |
| 128. gyrB-gyrA_W_16_2  | 7073  | 7212 ATGGGCGAGGACGCTCGACGC-(BRIDGE)-GGTCTAGGTGAATGGACGCTAAGGAGTTG    |
| 129. gyrB-gyrA_W_17_1  | 7213  | 7352 TCGCTCGACGGATCGAACCG-(BRIDGE)-GCGGCGCAGCTTTATCACCCG             |
| 130. gyrB-gyrA_W_17_1a | 7213  | 7352 TCGCTCGACGGATCGAACCG-(BRIDGE)-GCGGCGCAGCTTTATCACCCG             |
| 131. gyrB-gyrA_W_18_2  | 7353  | 7492 TGCTCTATGCAATGTTGATTCCGGCTT-(BRIDGE)-GTTGACATCGAGCAGGAGATGCAGC  |
| 132. gyrB-gyrA_W_18_2a | 7353  | 7492 TGCTCTATGCAATGTTGATTCCGGCTT-(BRIDGE)-GTTGACATCGAGCAGGAGATGCAGC  |
| 133. gyrB-gyrA_W_19_1  | 7493  | 7632 GCTCGCTACCCGCTGGTGG-(BRIDGE)-CCGCCCGACCCGACGCCAG                |
| 134. gyrB-gyrA_W_20_2  | 7633  | 7772 AGGAGACAGTCGATTTTCATCCCTAACTACGAC-(BRIDGE)-ACGGCCAGGGCAACTTCGGC |
| 135. gyrB-gyrA_W_21_1  | 7773  | 7912 GCCGACGCGTGTCTGGGC-(BRIDGE)-GGCCGGGTGCAAGAGCCGAC                |
| 136. gyrB-gyrA_W_22_2  | 7913  | 8052 CAAAAGTGGCCGGCTCCA-(BRIDGE)-GCTGGAGAATCACGACGCCGAC              |
| 137. gyrB-gyrA_W_22_2a | 7913  | 8052 CAAAAGTGGCCGGCTCCA-(BRIDGE)-GCTGGAGAATCACGACGCCGAC              |
| 138. gyrB-gyrA_W_23_1  | 8053  | 8192 TCCGAGACGGCAAGCTGGCC-(BRIDGE)-TTCGAATGCGCGGAGTTGTTGAGG          |
| 139. gyrB-gyrA_W_23_1a | 8053  | 8192 TCCGAGACGGCAAGCTGGCC-(BRIDGE)-TTCGAATGCGCGGAGTTGTTGAGG          |
| 140. gyrB-gyrA_W_24_2  | 8193  | 8332 CGACACCAGCTTTGGCCCAA-(BRIDGE)-GGCATTTCACCAATTGAGGACCAGTCTAGC    |
| 141. gyrB-gyrA_W_24_2a | 8193  | 8332 CGACACCAGCTTTGGCCCAA-(BRIDGE)-GGCATTTCACCAATTGAGGACCAGTCTAGC    |
| 142. gyrB-gyrA_W_25_1  | 8333  | 8472 GGCAAAACGAGCGAGCCACATTC-(BRIDGE)-CATGCTAGCGATCGTCGACGGGG        |
| 143. gyrB-gyrA_W_26_2  | 8473  | 8612 CCAGGCCAGGCAATCCTGGAC-(BRIDGE)-TGCGCGCCTGGTTAAAGCG              |
| 144. gyrB-gyrA_W_27_1  | 8613  | 8752 ATCTGTGCGCGACGAACTCGC-(BRIDGE)-ATGACAGTTGCGGCGCCTGGC            |
| 145. gyrB-gyrA_W_28_2  | 8753  | 8892 GGGATACGCCAAGCGCACCAAGA-(BRIDGE)-CGAAATCGTGGACAGGCACGGC         |
| 146. gyrB-gyrA_W_29_1  | 8893  | 9032 CTTACACCCAGGGACGGGTTTAT-(BRIDGE)-CCGATCTGTATCGACCCAGAAACG       |
| 147. gyrB-gyrA_W_29_1a | 8893  | 9032 CTTACACCCAGGGACGGGTTTAT-(BRIDGE)-CCGATCTGTATCGACCCAGAAACG       |
| 148. gyrB-gyrA_W_30_2  | 9033  | 9172 ACCGACGCCCTACTGGT-(BRIDGE)-CGGGCAAGGCTACGACTTGC                 |
| 149. gyrB-gyrA_W_31_1  | 9173  | 9312 GTTTCGCGCCGACGACGACC-(BRIDGE)-GCTGGCCACTCGCAACGGGC              |
| 150. gyrB-gyrA_W_31_1a | 9173  | 9312 GTTTCGCGCCGACGACGACC-(BRIDGE)-GCTGGCCACTCGCAACGGGC              |
| 151. gyrB-gyrA_W_32_2  | 9313  | 9452 GCTGCTGCTGCTGAACGTCGTG-(BRIDGE)-TGCTGCTGGTCTCGGCCAACG           |
| 152. gyrB-gyrA_W_33_1  | 9453  | 9592 CGGCGCGCAGGTTGGTGG-(BRIDGE)-CGTGAAGGCACCTATCTGCTGGTGG           |
| 153. gyrB-gyrA_W_34_2  | 9593  | 9732 TGAATCTGGCGGAGGGGCGACA-(BRIDGE)-GGCGTTGATTGTCGACGACGACA         |
| 154. gyrB-gyrA_W_35_1  | 9733  | 9872 CGTAGCATCTGAGGAGGAATCGGG-(BRIDGE)-CACTGTTGGCCATCGCGCGC          |
| 155. gyrB-gyrA_W_36_2  | 9873  | 10012 CACATCGGCGAGCAGCCGGG-(BRIDGE)-CAGCTAGGCTCGGCAGCCGG             |
| 156. gyrB-gyrA_C_1_2   | 5023  | 5162 TCTCAGGCCGGACCCGAGC-(BRIDGE)-CGGGCCAGGGCCGATCTT                 |
| 157. gyrB-gyrA_C_2_1   | 5163  | 5302 GGTGCGACACCCTGTACCGTGAT-(BRIDGE)-TTCGAGAATGGTGATAGACCGCAGCGC    |
| 158. gyrB-gyrA_C_3_2   | 5303  | 5442 TTGCGGACGGCCTCAGCC-(BRIDGE)-ACTACGTTCACTGTGGTTGCATAACCCGG       |
| 159. gyrB-gyrA_C_4_1   | 5443  | 5582 GACACCCCATCTCAAGCAGC-(BRIDGE)-CATACGCGTCCGAGTCAACTTGC           |
| 160. gyrB-gyrA_C_5_2   | 5583  | 5722 CGCCGTGACAGCACCAGATATCG-(BRIDGE)-CCTTGCTTGGAGCCAGGGG            |
| 161. gyrB-gyrA_C_6_1   | 5723  | 5862 CCCGTCTTCTGGTCGGCGC-(BRIDGE)-AGGTTGATGTCAGCCCTTGTGA             |
| 162. gyrB-gyrA_C_7_2   | 5863  | 6002 CTTGGGTCACCTCTCTCGGTC-(BRIDGE)-CCGATAGTGAAGGTTGCGGCTCT          |
| 163. gyrB-gyrA_C_8_1   | 6003  | 6142 GTTTCACGAAGTCCACAGGCCAC-(BRIDGE)-CACCGACTCCGAATACCCGGCG         |
| 164. gyrB-gyrA_C_9_2   | 6143  | 6282 TGTTGATGGTGTGGCGAAGGTGTG-(BRIDGE)-TCACCGGTGAGGTTGGGGTCC         |
| 165. gyrB-gyrA_C_10_1  | 6283  | 6422 GGCCAGGCTTCCCGATATCG-(BRIDGE)-AGTGGGTCAGCTGTTGTTACAGACC         |
| 166. gyrB-gyrA_C_11_2  | 6423  | 6562 GTCGGTGGGTTGGCTTCAAACC-(BRIDGE)-CTTCCGGGCAATCCACCGATG           |
| 167. gyrB-gyrA_C_12_1  | 6563  | 6702 CGTGAACGGCAATCGGCCAG-(BRIDGE)-ACATTGATGATCTTCCCGCAGC            |
| 168. gyrB-gyrA_C_13_2  | 6703  | 6842 CGGTGATGCGCGCTTCTCC-(BRIDGE)-CATCGGCTCGGCCATCAGC                |
| 169. gyrB-gyrA_C_14_1  | 6843  | 6982 CAGCGTGAATAATGTTGGCCGTC-(BRIDGE)-TGCGAATCCGGGTCACTGCG           |
| 170. gyrB-gyrA_C_14_1a | 6843  | 6982 CAGCGTGAATAATGTTGGCCGTC-(BRIDGE)-TGCGAATCCGGGTCACTGCG           |
| 171. gyrB-gyrA_C_15_2  | 6983  | 7122 TCGCGCTCGCGGTCGGAGTA-(BRIDGE)-GGATCCATGGTGGTCTCCACAACTC         |
| 172. gyrB-gyrA_C_16_1  | 7123  | 7262 ACTTGACGCAACACGAAACCAG-(BRIDGE)-CATCCAGGAACCAATCCTTGGCG         |
| 173. gyrB-gyrA_C_17_2  | 7263  | 7402 CAATCGAACGCGGTTGCGTTAGA-(BRIDGE)-CTCATCGATAGTCGATGATGTCGCG      |
| 174. gyrB-gyrA_C_18_1  | 7403  | 7542 GCGCGCGCCGACGATCACG-(BRIDGE)-TGGTCTCGGCAACCGACCGG               |
| 175. gyrB-gyrA_C_19_2  | 7543  | 7682 CGTGCGGGTGTTAGTTGCCA-(BRIDGE)-CATCCCGCGGTTGGGTCAT               |
| 176. gyrB-gyrA_C_19_2a | 7543  | 7682 CGTGCGGGTGTTAGTTGCCA-(BRIDGE)-CATCCCGCGGTTGGGTCAT               |
| 177. gyrB-gyrA_C_19_2b | 7543  | 7682 CGTGCGGGTGTTAGTTGCCA-(BRIDGE)-CATCGTCGCGGTTGGGTCAT              |
| 178. gyrB-gyrA_C_20_1  | 7683  | 7822 CAGCCGGCTTCGGTGTACT-(BRIDGE)-AGCAGGTTGGGGAACCGGT                |
| 179. gyrB-gyrA_C_21_2  | 7823  | 7962 TGCCGCTGACCCGTTGGCC-(BRIDGE)-CCATGACCGCGCCAGGGTC                |
| 180. gyrB-gyrA_C_22_1  | 7963  | 8102 GTCCGGGCTTAAACCCGCC-(BRIDGE)-GGTACGACCGCGGAATCCTCT              |
| 181. gyrB-gyrA_C_23_2  | 8103  | 8242 GGCAACTCGGTATCACGACGA-(BRIDGE)-ATGCGTAAACCGACCCGATCGCT          |
| 182. gyrB-gyrA_C_24_1  | 8243  | 8382 GCATCGCGCTTATCTCGATGACG-(BRIDGE)-GCTGGTCCAGCCGACGCGTG           |
| 183. gyrB-gyrA_C_25_2  | 8383  | 8522 AGTTGGTGTCAACGTAATAGCGGATCA-(BRIDGE)-CAGTCAATGACCTCTCCAGCG      |
| 184. gyrB-gyrA_C_26_1  | 8523  | 8662 ACGGTCTCCGACGCCGGAT-(BRIDGE)-TCGTGATGATGCGCTGGCG                |
| 185. gyrB-gyrA_C_27_2  | 8663  | 8802 CTCGGCCTCGATTTGGCCAGG-(BRIDGE)-CCGCGATGATCCGGGTACGC             |
| 186. gyrB-gyrA_C_28_1  | 8803  | 8942 CGTCGCTGACGCTCCGTCGG-(BRIDGE)-CGCACCTGCACGCCCTTGC               |
| 187. gyrB-gyrA_C_28_1a | 8803  | 8942 CGTCGCTGACGCTCCGTCGG-(BRIDGE)-CGCACCTGCACGCCCTTGC               |
| 188. gyrB-gyrA_C_29_2  | 8943  | 9082 CGACGATGTCGCTCTGTTCAACCC-(BRIDGE)-TGCCCGCGCGCCCTCGGGA           |
| 189. gyrB-gyrA_C_30_1  | 9083  | 9222 GGCTAACAGGTTGGCCACGTGC-(BRIDGE)-CGAAGTCGGTCAGCTTGGACTTTTTCAC    |
| 190. gyrB-gyrA_C_31_2  | 9223  | 9362 TCCGCCGAGCGATTGGAGT-(BRIDGE)-GTCGGTCCCGAGAACCTGATGG             |
| 191. gyrB-gyrA_C_32_1  | 9363  | 9502 CCCATTGGCCGACGCCCTC-(BRIDGE)-CGTTTCGATAGCCCCCTGACG              |

| # Probe name          | Start  | End Sequence                                                          |
|-----------------------|--------|-----------------------------------------------------------------------|
| 192. gyrB-gyrA_C_33_2 | 9503   | 9642 ACCGGGTATTCTCGATCGCGGTA-(BRIDGE)-CGCCGGAAGTGACGGCATAACAG         |
| 193. gyrB-gyrA_C_34_1 | 9643   | 9782 CGCGGTGCGGATCACGCCAC-(BRIDGE)-GGCATTATCGTCCGACCTTCTTCGG          |
| 194. gyrB-gyrA_C_35_2 | 9783   | 9922 TCTGCGCGTTGGCGTCCAC-(BRIDGE)-TGCAGTACCACCGACTCTAACAC             |
| 195. rpoB_W_1_1       | 759637 | 759776 ACCGCTCTCTAAGGGCTCTCGT-(BRIDGE)-GTGGTCTTAGTCTGAGCCAGTTTGGC     |
| 196. rpoB_W_2_2       | 759777 | 759916 GCCAACCCGGTCTCTTCGCTAA-(BRIDGE)-TGGTCGCATGAAGTCTGGAAGGA        |
| 197. rpoB_W_3_1       | 759917 | 760056 TGGGTGGCTGGAAGAGGTGC-(BRIDGE)-GCTGCGGAACCACTTGAGGT             |
| 198. rpoB_W_4_2       | 760057 | 760196 GCGGCTCCACTGTTCTGTCACC-(BRIDGE)-TCTACGAGCTGTCTCCGATCGAGGA      |
| 199. rpoB_W_4_2a      | 760057 | 760196 GCGGCTCCGCTGTTCTGTCACC-(BRIDGE)-TCTACGAGCTGTCTCCGATCGAGGA      |
| 200. rpoB_W_4_2b      | 760057 | 760196 GCGGCCCACTGTTCTGTCACC-(BRIDGE)-TCTACGAGCTGTCTCCGATCGAGGA       |
| 201. rpoB_W_5_1       | 760197 | 760336 AGCCAGCTGGTGGCTGCC-(BRIDGE)-GCCGAGTTCATCAACAACAACACCCGG        |
| 202. rpoB_W_6_2       | 760337 | 760476 CGTGCGCATCGACCGCAAAC-(BRIDGE)-CGGGGTGTAATTGACGAGACCAT          |
| 203. rpoB_W_6_2a      | 760337 | 760476 GGTGCGCATCGACCGCAAAC-(BRIDGE)-CGGGGTGTAATTGACGAGACCAT          |
| 204. rpoB_W_7_1       | 760477 | 760616 CCGACGAGGCGCTTTGGAC-(BRIDGE)-GCCGGCAACCGGTCACCGTG              |
| 205. rpoB_W_7_1a      | 760477 | 760616 CCGACGAGGCGCTGCTGGAC-(BRIDGE)-GCCGGCAACCGGTCACCGTG             |
| 206. rpoB_W_8_2       | 760617 | 760756 GGTCAACAAGAAGCTCGGGTGA-(BRIDGE)-ATCTACCAGCTGCTGCTCCGG          |
| 207. rpoB_W_9_1       | 760757 | 760896 TGCCGGTGAACCGACGACA-(BRIDGE)-TGTCGGGAGCCATCACGT                |
| 208. rpoB_W_10_2      | 760897 | 761036 GAGGCGATCACCCGACAGC-(BRIDGE)-TCGACCATTCCGCAACCCGC              |
| 209. rpoB_W_10_2a     | 760897 | 761036 GAGGCGATCACCCGACAGC-(BRIDGE)-TCGACCATTCCGCAACCCGC              |
| 210. rpoB_W_11_1      | 761037 | 761176 GCGCTGGGGCCCGGCTCT-(BRIDGE)-TTGATCAACATCCGCGCGTGGT             |
| 211. rpoB_W_11_1a     | 761037 | 761176 GCGCGGGGCCCGGCTCT-(BRIDGE)-TTGATCAACATCCGCGCGTGGT              |
| 212. rpoB_W_12_2      | 761177 | 761316 GCGCGGGTCAACCCGTTG-(BRIDGE)-GTCAGTGTGAGGTCGCGGGC               |
| 213. rpoB_W_13_1      | 761317 | 761456 GCGGACGCTCGCTTCGTCGAG-(BRIDGE)-GGTTCATCGAAACCGCTACCCG          |
| 214. rpoB_W_13_1a     | 761317 | 761456 GCGGACGCTCGCTTCGTCGAG-(BRIDGE)-GGTTCATCGAAACCGCTACCCG          |
| 215. rpoB_W_14_2      | 761457 | 761596 CCTGGAGCAGCAGCAGCCAA-(BRIDGE)-CCGCGCTGTGGTTCGCGC               |
| 216. rpoB_W_15_1      | 761597 | 761736 CGCGAAGAAGCGCGTCA-(BRIDGE)-CCGTGCCCTCATGGGGCAA                 |
| 217. rpoB_W_16_2      | 761737 | 761876 TGGACGCGGGGACCGAGTC-(BRIDGE)-TCGAGGAGGTGTCGCGCGAC              |
| 218. rpoB_W_17_1      | 761877 | 762016 CCTGTCCAACCCGCTGGTGA-(BRIDGE)-GAGGCCGTCAGGTGATCGCC             |
| 219. rpoB_W_17_1a     | 761877 | 762016 CCTGTCCAACCCGCTGGTGA-(BRIDGE)-GAGGCCGTCAGGTGATCGCC             |
| 220. rpoB_W_17_1b     | 761877 | 762016 CCTGTCCAACCCGCTGGTGA-(BRIDGE)-GAGGCCGTCAGGTGATCGCC             |
| 221. rpoB_W_18_2      | 762017 | 762156 ACCTGGATGAGCGGGCATCG-(BRIDGE)-AGAGGACGTGCTCACCTCGATCCA         |
| 222. rpoB_W_18_2a     | 762017 | 762156 ACCTGGATGAGCGGGCATCG-(BRIDGE)-AGAGGACGTGCTCACCTCGATCCA         |
| 223. rpoB_W_19_1      | 762157 | 762296 GCGAGGTGCGCGACTTCG-(BRIDGE)-TGCGCATCGGTGCCGAGGT                |
| 224. rpoB_W_20_2      | 762297 | 762436 AGAAACGAAGATCTCCGACGTGA-(BRIDGE)-CTGAAGGTGCCGACGGCGGA          |
| 225. rpoB_W_20_2a     | 762297 | 762436 AGAAACGAAGATCTCCGACGTGA-(BRIDGE)-CTGAAGGTGCCGACGGCGGA          |
| 226. rpoB_W_21_1      | 762437 | 762576 GCGACGGATGAACATCGGCC-(BRIDGE)-CAAGTGGCCGCGCCGACG               |
| 227. rpoB_W_22_2      | 762577 | 762716 GCCATTGTGTCGACCGCGTG-(BRIDGE)-AGATTTTGGAGCCACCTGGGTTGG         |
| 228. rpoB_W_23_1      | 762717 | 762856 GAGCCGTTCCGTAACCCGGT-(BRIDGE)-TTCGACGGCCAGGAGGC                |
| 229. rpoB_W_24_2      | 762857 | 762996 CGGTGGGACGCGTTCGGGG-(BRIDGE)-CACGGTTGGCTACATGTACATCATGAAGC     |
| 230. rpoB_W_24_2a     | 762857 | 762996 CGGTGGGACGCGTTCGGGG-(BRIDGE)-CACGGTTGGCTACATGTACATCATGAAGC     |
| 231. rpoB_W_25_1      | 762997 | 763136 AGAACATCCCGAGCCGGGC-(BRIDGE)-AGATGGAGTGTGGCCATGCA              |
| 232. rpoB_W_25_1a     | 762997 | 763136 AGAACATCCCGAGCCGGGC-(BRIDGE)-AGATGGAGTGTGGCCATGCA              |
| 233. rpoB_W_26_2      | 763137 | 763276 CGGGCCGCGCAACCTGGG-(BRIDGE)-ATCCCCGAGTCTTCAAGGTGCTG            |
| 234. rpoB_W_27_1      | 763277 | 763416 CGATGAATCCCGATCGGTTGCTAC-(BRIDGE)-AATCAATCTGTCCGCAACGAATCCGC   |
| 235. rpoB_C_1_2       | 759687 | 759826 GGCGAACGATCTGTCCGATCTCA-(BRIDGE)-CTTGCGGGAATCTGCAAGATGC        |
| 236. rpoB_C_2_1       | 759827 | 759966 TCGGACTAGGACTAGCGGCTTTTTG-(BRIDGE)-AATCGGTCTGGAGCTCAAGGAGTCC   |
| 237. rpoB_C_3_2       | 759967 | 760106 CGAACCGATCAGCCACTCGAACG-(BRIDGE)-CGACAACGACATCGACCCGGAGA       |
| 238. rpoB_C_4_1       | 760107 | 760246 GACATCGTGAACAGGAGGTGAGAGAA-(BRIDGE)-AACACCGTCTGACTCTTATCTACCCG |
| 239. rpoB_C_4_1a      | 760107 | 760246 GACATCGTGAACAGGAGGTGAGAGAA-(BRIDGE)-AACACCGTCTGACTCTTATCTACCCG |
| 240. rpoB_C_5_2       | 760247 | 760386 CGGTATCATCGGGAAGTACCATG-(BRIDGE)-GCAGCGTCTTGTGCGTGGACTTG       |
| 241. rpoB_C_6_1       | 760387 | 760526 GCTCGGATCACCTTGACGCTGT-(BRIDGE)-CTCGTGGTCCAGCCAGCG             |
| 242. rpoB_C_6_1a      | 760387 | 760526 GCTCGGATCACCTTGACGCTGT-(BRIDGE)-CTCGTGGTCCAGCCAGCG             |
| 243. rpoB_C_6_1b      | 760387 | 760526 GCTCGGATCACCTTGACGCTGT-(BRIDGE)-CTCGTGGTCCAGCCAGCG             |
| 244. rpoB_C_7_2       | 760527 | 760666 GAACCCGAACCGCTCGACAATCTG-(BRIDGE)-TGCCTGACTCTTGGTCCGGG         |
| 245. rpoB_C_7_2a      | 760527 | 760666 GAACCCGAACCGCTCGACAATCTG-(BRIDGE)-TGCCTGACTCTTGGTCCGGG         |
| 246. rpoB_C_8_1       | 760667 | 760806 TCCTTGAAGAACAGTTTTTCAACAGCGTC-(BRIDGE)-CCACGAGTCTTCTTGGTCCAGCG |
| 247. rpoB_C_9_2       | 760807 | 760946 GCAAGCGGACAGATATTCGATGGTGG-(BRIDGE)-TTGGATCAGCTCGCCGACCGT      |
| 248. rpoB_C_10_1      | 760947 | 761086 ACATGCCGACCCGATCTGGTT-(BRIDGE)-GTGCCGAAGAAGTCTTATCTACCGG       |
| 249. rpoB_C_10_1a     | 760947 | 761086 ACATGCCGACCCGATCTGGTT-(BRIDGE)-GTGCCGAAGAAGTCTTATCTACCGG       |
| 250. rpoB_C_11_2      | 761087 | 761226 GTCCATGAATTGGCTCAGCTGGCTG-(BRIDGE)-AGTGCAGCGGTCACGCTCG         |
| 251. rpoB_C_11_2a     | 761087 | 761226 GTCCATGAATTGGCTCAGCTGGCTG-(BRIDGE)-AGTGCAGCGGTCACGCTCG         |
| 252. rpoB_C_11_2b     | 761087 | 761226 GTCCATGAATTGGCTCAGCTGGCTG-(BRIDGE)-AGTGCAGCGGTCACGCTCG         |
| 253. rpoB_C_11_2c     | 761087 | 761226 GTCATGAATTGGCTCAGCTGGCTG-(BRIDGE)-AGTGCAGCGGTCACGCTCG          |
| 254. rpoB_C_11_2d     | 761087 | 761226 GTCATGAATTGGCTCAGCTGGCTG-(BRIDGE)-AGTGCAGCGGTCACGCTCG          |
| 255. rpoB_C_11_2e     | 761087 | 761226 GTCCATGAATTGGCTCAGCTGGCTG-(BRIDGE)-AGTGCAGCGGTCACGCTCG         |
| 256. rpoB_C_12_1      | 761227 | 761366 GATCGGGACATCCGGCCGT-(BRIDGE)-GTCGTAACACGCGCTCGAC               |
| 257. rpoB_C_12_1a     | 761227 | 761366 GATCGGGACATCCGGCCGT-(BRIDGE)-GTCGTAACACGCGCTCGAC               |



| # Probe name          | Start   | End Sequence                                                            |
|-----------------------|---------|-------------------------------------------------------------------------|
| 258. rpoB_C_12_1b     | 761227  | 761366 GATCGGGACATCCGGCCGT-(BRIDGE)-GTCGCTAACACGACGATCGAC               |
| 259. rpoB_C_13_2      | 761367  | 761506 TCGGCGGTACAGGTACACGATCTC-(BRIDGE)-GAGGGCAGTACTCCACTCGC           |
| 260. rpoB_C_13_2a     | 761367  | 761506 TCGGCGGTACAGGTACACGATCTC-(BRIDGE)-GAGGGCAGTACTCCACTCGC           |
| 261. rpoB_C_13_2b     | 761367  | 761506 TCGGCGGTACAGGTACACGATCTC-(BRIDGE)-GAGGGCAGTACTCCACTCGC           |
| 262. rpoB_C_13_2c     | 761367  | 761506 TCGGCGGTACAGGTACACGATCTC-(BRIDGE)-GAGGGCAGTACTCCACTCGC           |
| 263. rpoB_C_13_2d     | 761367  | 761506 TCGGCGGTACAGGTACACGATCTC-(BRIDGE)-GAGGGCAGTACTCCACTCGC           |
| 264. rpoB_C_13_2e     | 761367  | 761506 TCGGCGGTACAGGTACACGATCTC-(BRIDGE)-GAGGGCAGTACTCCACTCGC           |
| 265. rpoB_C_13_2f     | 761367  | 761506 TCGGCGGTACAGGTACACGATCTC-(BRIDGE)-GAGGGCAGTACTCCACTCGC           |
| 266. rpoB_C_13_2g     | 761367  | 761506 TCGGCGGTACAGGTACACGATCTC-(BRIDGE)-GAGGGCAGTACTCCACTCGC           |
| 267. rpoB_C_13_2h     | 761367  | 761506 TCGGCGGTACAGGTACACGATCTC-(BRIDGE)-GAGGGCAGTACTCCACTCGC           |
| 268. rpoB_C_14_1      | 761507  | 761646 CGAGAGCTCATGTAGTCCACCTCAGAC-(BRIDGE)-GGACCAGGGCACCCTGG           |
| 269. rpoB_C_15_2      | 761647  | 761786 CACCAGCGGGCCTCGCTAC-(BRIDGE)-GGTCCGTTGTCTGTCATCACA               |
| 270. rpoB_C_16_1      | 761787  | 761926 GCGCATCCGGTAGGTACGCCG-(BRIDGE)-ATCTCCGGTCTGTCAGTACAGGG           |
| 271. rpoB_C_17_2      | 761927  | 762066 GCAGGTTCTTGCACGCGCC-(BRIDGE)-GAGCATCGATCTCATGCTCCTCGATGT         |
| 272. rpoB_C_18_1      | 762067  | 762206 CGCACCCAGCTTGGTGTGCG-(BRIDGE)-GACCTTCCGACCAGGATGTCCC             |
| 273. rpoB_C_18_1a     | 762067  | 762206 CGCACCCAGCTTGGTGTGCG-(BRIDGE)-GACCTTCCGACCAGGATGTCCG             |
| 274. rpoB_C_19_2      | 762207  | 762346 GCTCGGTCTCACCTTCCGGGT-(BRIDGE)-AACACCCGAATGCCGATCACCTTGC         |
| 275. rpoB_C_20_1      | 762347  | 762486 CGTCTCTCCTCCGCGGAA-(BRIDGE)-GCAGGATCTTGGCGATCAGCC                |
| 276. rpoB_C_21_2      | 762487  | 762626 CAAGGAACGGCATGTCTCAACCG-(BRIDGE)-GACCTTCCAGCGCTGTGGGG            |
| 277. rpoB_C_22_1      | 762627  | 762766 GGAACCCCTTGGCGGCGTC-(BRIDGE)-AGCGTGCACGACAACAGGCC                |
| 278. rpoB_C_23_2      | 762767  | 762906 CGTACCGTCCGGTGTGGC-(BRIDGE)-TGTCTCCACAGGTGGTGCA                  |
| 279. rpoB_C_24_1      | 762907  | 763046 GGTGGAGCGGGCGTGGATCT-(BRIDGE)-CTGAGGGTGTAGGCAGACCC               |
| 280. rpoB_C_24_1a     | 762907  | 763046 GGTGGAGCGGGCGTGGATCT-(BRIDGE)-CTGAGGGTGTAGGCAGACCC               |
| 281. rpoB_C_24_1b     | 762907  | 763046 GGTGGAGCGGGCGTGGATCT-(BRIDGE)-CTGAGGGTGTAGGCAGACCC               |
| 282. rpoB_C_25_2      | 763047  | 763186 TGTCTCGGACTTGTGGTCAACAGCTC-(BRIDGE)-AGGCACAGCGACTGCAGTCTTTG      |
| 283. rpoB_C_25_2a     | 763047  | 763186 TGTCTCGGACTTGTGGTCAACAGCTC-(BRIDGE)-AGGCACAGCGACTGCAGTCTTTG      |
| 284. rpoB_C_26_1      | 763187  | 763326 CGTCACTCGATAGCACCTCGACGTTG-(BRIDGE)-TTTACGCAAGATCCTCGACACTTCCGG  |
| 285. rpoB_C_27_2      | 763327  | 763466 CCTAACGGGTTTAGTAATTTGCGACAGC-(BRIDGE)-TCTCCGGCTTTTGGACTCCGCA     |
| 286. mabA_inhA_W_1_1  | 1673100 | 1673239 CGCGACATACCTGCTCGCAA-(BRIDGE)-AAGGCAGAAAGCCGAGTAGCCGG           |
| 287. mabA_inhA_W_2_2  | 1673240 | 1673379 CCCGCCGAAATCGACGCA-(BRIDGE)-TTCGTAGGGCGTCAATACACCCGC            |
| 288. mabA_inhA_W_3_1  | 1673380 | 1673519 GGTACCGGAGGAAACCGGGGAT-(BRIDGE)-CGTTACGCTCGTGACATACCGATTT       |
| 289. mabA_inhA_W_4_2  | 1673520 | 1673659 CGTCGATCGCGCTTCCACGG-(BRIDGE)-CGGGTGGCGATCGCACAGC               |
| 290. mabA_inhA_W_5_1  | 1673660 | 1673799 CCGGGCGTTCGGGTGGCT-(BRIDGE)-CGGTAGAAGACACAGGGTCCG               |
| 291. mabA_inhA_W_6_2  | 1673800 | 1673939 TGATTGGCATGGCCGCTCGAT-(BRIDGE)-CAACGGGCATCGCGCAGCAT             |
| 292. mabA_inhA_W_7_1  | 1673940 | 1674079 AGCGAAGCGGGTCCGACCC-(BRIDGE)-CGCCCGAGCTGTGCAAGG                 |
| 293. mabA_inhA_W_8_2  | 1674080 | 1674219 CGCACATGACAGGACTGCTGGAC-(BRIDGE)-CCGCCGAGGTCCGCCGGGTG           |
| 294. mabA_inhA_W_9_1  | 1674220 | 1674359 CTGATTCAGCGCATCACCGACCG-(BRIDGE)-GGCAAACGGATTCTGGTTAGCGGAATC    |
| 295. mabA_inhA_W_10_2 | 1674360 | 1674499 TGCATTTCGATTGGGTTTCATCGCGC-(BRIDGE)-GCTCCGGCAAAGGCCCGC          |
| 296. mabA_inhA_W_11_1 | 1674500 | 1674639 CCCGAGGTTCCATCGTCGGC-(BRIDGE)-AGACCGGGATGGGCATCAACCC            |
| 297. mabA_inhA_W_12_2 | 1674640 | 1674779 AATCTCGTTGCCGAGGCC-(BRIDGE)-ATGGACTTCGACCCGAGCCGG               |
| 298. mabA_inhA_W_13_1 | 1674780 | 1674919 GGATCGCAGCGCGTCCGCA-(BRIDGE)-TATCCGGACGCTGGCGATGAGTG            |
| 299. mabA_inhA_W_14_2 | 1674920 | 1675059 GCTGTCTTCCGGCGACCCG-(BRIDGE)-AGACGGTGTGCGCGCTGCTG               |
| 300. mabA_inhA_W_15_1 | 1675060 | 1675199 ACCGATCAATGGCATTATTCGACACTG-(BRIDGE)-AAGGGCCGAGCAGGTGCGG        |
| 301. mabA_inhA_C_1_2  | 1673150 | 1673289 AATTGCGTCAAAGCGCTGTGG-(BRIDGE)-CCTTCTGGGCGAGGAGCC               |
| 302. mabA_inhA_C_2_1  | 1673290 | 1673429 TCAGCACACTTCGACCATGACGGATC-(BRIDGE)-TATCGTCTCGCCGCGCCGG         |
| 303. mabA_inhA_C_2_1a | 1673290 | 1673429 TCAGCACACTTCGACCATGACGGATC-(BRIDGE)-TATCATCTCGCCGCGCCGG         |
| 304. mabA_inhA_C_3_2  | 1673430 | 1673569 TGTGGCAGTACCCCGACAACC-(BRIDGE)-CGGCCACCTTGTGGCCGTCG             |
| 305. mabA_inhA_C_3_2a | 1673430 | 1673569 TGTGGCAGTACCCCGACAACC-(BRIDGE)-CGGCCACCTTGTGGCCGTCG             |
| 306. mabA_inhA_C_4_1  | 1673570 | 1673709 GCTCCGGATCCACGGTGGTGA-(BRIDGE)-GCCGCGTGGACACCAGCA               |
| 307. mabA_inhA_C_5_2  | 1673710 | 1673849 GCATGAGGAATGCGTCCGGGATAG-(BRIDGE)-AATATCATTGACCGAATTTGTTGCGCTGC |
| 308. mabA_inhA_C_6_1  | 1673850 | 1673989 AGCTCCGAGACCGAACCTATG-(BRIDGE)-CCGGGGCCACCATTCGCG               |
| 309. mabA_inhA_C_7_2  | 1673990 | 1674129 CCGGGTCATATCGGTGTCGATGAGC-(BRIDGE)-GCTCGCATCTCGGAAGCCAGG        |
| 310. mabA_inhA_C_8_1  | 1674130 | 1674269 CCGGGATGACCGCACCGGAGATATA-(BRIDGE)-AACGCGATCGACGAGTCCGGTGA      |
| 311. mabA_inhA_C_8_1a | 1674130 | 1674269 CCGGGATGACCGCACCGGAGATATA-(BRIDGE)-AACGCGTTCGACGAGTCCGGTGA      |
| 312. mabA_inhA_C_9_2  | 1674270 | 1674409 TGGGCTACCGTGGATGTGA-(BRIDGE)-GCTCCTCGTTTTGACAGTTCGAGTT          |
| 313. mabA_inhA_C_10_1 | 1674410 | 1674549 CCGGCCAAGCTGCCAGGT-(BRIDGE)-CACATCCCGTATAGGCGCGT                |
| 314. mabA_inhA_C_11_2 | 1674550 | 1674689 CCGGAGATGTGGATCCCTTGA-(BRIDGE)-ACCGTATCCAGTTGTAGGCCGG           |
| 315. mabA_inhA_C_12_1 | 1674690 | 1674829 ACTCAAACGGCTTGGCG-(BRIDGE)-CCTCCGCGAGCCGACCCCGC                 |
| 316. mabA_inhA_C_13_2 | 1674830 | 1674969 CTGGATCTGGGCGCCGCT-(BRIDGE)-GTCACCCGTGGTCCGGCGCA                |
| 317. mabA_inhA_C_14_1 | 1674970 | 1675109 CCGCCGTCGGCGTAGATGAT-(BRIDGE)-GCGGCCCGGGTAACGTTCT               |
| 318. katG_W_1_1       | 2156311 | 2156171 GGGGTCTATGTCTGATTGTTCCGATATCCG-(BRIDGE)-CCGGTCTTGGCGGGTTATCGC   |
| 319. katG_W_2_2       | 2156171 | 2156031 GCTGTCCGTCGTTGGTTCATATGAA-(BRIDGE)-ACATCTCGGATCACATCCGTATCA     |
| 320. katG_W_3_1       | 2156031 | 2155891 GAGTCCGCGACCATCGACGTTG-(BRIDGE)-ATACCCGTCGAGGGCCGGC             |
| 321. katG_W_4_2       | 2155891 | 2155751 GCATCCACGACGGCCGCGC-(BRIDGE)-ACGCCCTGACGCGGACATC                |
| 322. katG_W_5_1       | 2155751 | 2155611 GCTCTATGGCGGACCTGATTGTTTT-(BRIDGE)-GGCGCCGGGGCGGCATGCA          |
| 323. katG_W_6_2       | 2155611 | 2155471 GCGATGAGCGTTACAGCGGTAAGC-(BRIDGE)-CGCCGCAACTGCGCGCTGG           |

| # Probe name          | Start   | End Sequence                                                       |
|-----------------------|---------|--------------------------------------------------------------------|
| 324. katG_W_7_1       | 2155471 | 2155331 GCGCATGGCCATGAACGACGTC-(BRIDGE)-GGGATCTGGAGAACCCGCTGGC     |
| 325. katG_W_8_2       | 2155331 | 2155191 TGGAAAGACTCGTATGGCACCGG-(BRIDGE)-GAAACAGCGGCGCTGATCGTCG    |
| 326. katG_W_9_1       | 2155191 | 2155051 CCTGCTGGCGCTTGGCAATACA-(BRIDGE)-AACCGTAAGGACGCGATCACCA     |
| 327. katG_W_10_2      | 2155051 | 2154911 CGCGTCGCTGGCTGGAACAC-(BRIDGE)-CCGCCAAGGACGGCGCGGGT         |
| 328. katG_W_11_1      | 2154911 | 2154771 CCGGTCCCTGCGGTACGCCA-(BRIDGE)-CCCGAGGAATGGCCGACGAGT        |
| 329. katG_W_12_2      | 2154771 | 2154631 CAAGCGCGGCGGCGCAACG-(BRIDGE)-CGACCTCGTCGCGAAGCCG           |
| 330. katG_W_13_1      | 2154631 | 2154491 GCCGGGGAACATCAAAGTGTCTTC-(BRIDGE)-GTGGTCGCATCCGCTGCAG      |
| 331. katG_W_14_2      | 2154491 | 2154351 CGACGTGGAATCTTTGCCGTGCT-(BRIDGE)-GCCGACCTCGCTGCTCGG        |
| 332. katG_W_15_1      | 2154351 | 2154211 GGTAGTGGCGCTGCGCTCC-(BRIDGE)-GGAGCCAAAGGACAGATGGCTTCC      |
| 333. katG_W_16_2      | 2154211 | 2154071 CAGATGACGGGACCTACCAGGGC-(BRIDGE)-TCGGCGCAAACATAAGCGCTT     |
| 334. katG_W_17_1      | 2154071 | 2153931 CGTGCAGGACTTCGTCTGCTGC-(BRIDGE)-AAGGATGGCAGTGGCAAGGTGAAGT  |
| 335. katG_W_18_2      | 2153931 | 2153791 CTGTGTTTTGCCCGCGCGA-(BRIDGE)-CTGGACAAGGTGATGAACCTCGACA     |
| 336. katG_C_1_2       | 2156261 | 2156121 GGTCCGAGGCGCTCAGACAGG-(BRIDGE)-CCAGGAGTTGGTGTATCGGGCTGT    |
| 337. katG_C_2_1       | 2156121 | 2155981 GTTCTCGGGCACAGCATTCTTC-(BRIDGE)-TGAGCCGGTTGGCCACCAAG       |
| 338. katG_C_3_2       | 2155981 | 2155841 CCGGGTTTTGGTGCAGTACCTCAGAT-(BRIDGE)-CCACGGCTGCGAGGTGGTCA   |
| 339. katG_C_4_1       | 2155841 | 2155701 TGGCCGTAGTCGGCGGCCA-(BRIDGE)-TCGGCCAGCTGTTAAGCGGC          |
| 340. katG_C_5_2       | 2155701 | 2155561 CGCCTTGCCAAGCTGGCGTTG-(BRIDGE)-CGAACCCGAACGTTGAAGCCC       |
| 341. katG_C_6_1       | 2155561 | 2155421 CTGGTCGACCCGCGCAAGC-(BRIDGE)-CACGTAGATCAGCCCATCTGCACC      |
| 342. katG_C_7_2       | 2155421 | 2155281 CCGTTCGGCCCTCCGGTT-(BRIDGE)-CCATGGTCTTACCGAAAGTGTGACCCG    |
| 343. katG_C_7_2a      | 2155421 | 2155281 CCGTTCGGCCCTCCGGTT-(BRIDGE)-CCATGGTCTTACCGAAAGTGTGACCCG    |
| 344. katG_C_8_1       | 2155281 | 2155141 CCAGATCGGCGCGGCCGCG-(BRIDGE)-TGTTCTCCATACGACCTCGATGCC      |
| 345. katG_C_8_1a      | 2155281 | 2155141 CCAGATCGGCGCGGCCGCG-(BRIDGE)-TGTTCTCCATACGACCTCGATGCC      |
| 346. katG_C_9_2       | 2155141 | 2155001 GAAACTGTTGCCATTTCTCGGGG-(BRIDGE)-CCCGCCAAGCGGTCCGGGA       |
| 347. katG_C_10_1      | 2155001 | 2154861 ATCGTCCGGGACGCCCTCGG-(BRIDGE)-TGGATCAGCTGTACACAGGCCCTTG    |
| 348. katG_C_11_2      | 2154861 | 2154721 CGCAACGGGACCCATGTCTCGG-(BRIDGE)-CCCGATCTGGCTCTTAAGGCTGG    |
| 349. katG_C_11_2a     | 2154861 | 2154721 CGCAACGGGACCCATGTCTCGG-(BRIDGE)-CCAGGATCTGGCTCTTAAGGCTGG   |
| 350. katG_C_12_1      | 2154721 | 2154581 AACTAGCTGTGAGACAGTCAATCCCGATG-(BRIDGE)-GGGGTCTGTACCTCCACCC |
| 351. katG_C_13_2      | 2154581 | 2154441 TGACCTTGCAGATCCCGTC-(BRIDGE)-TTGCTGTCTTCTATGGCGGCAC        |
| 352. katG_C_14_1      | 2154441 | 2154301 TGATGTTGGCCAGCCGCC-(BRIDGE)-ACGGTGTGCCCTTCCAGAGGT          |
| 353. katG_C_15_2      | 2154301 | 2154161 GCAGCATGTACTCGCCGCGA-(BRIDGE)-GGAGGCTCGGTGAACACGC          |
| 354. katG_C_16_1      | 2154161 | 2154021 TCACGAAGAAGTCTGGTTCAGTGACTC-(BRIDGE)-ACCAGGTCACCGCGGCTGCC  |
| 355. katG_C_17_2      | 2154021 | 2153881 CGCAACTCCGAGTTGGACCCGAAG-(BRIDGE)-ACCCGAATCAGCGCACGTCG     |
| 356. katG_C_18_1      | 2153881 | 2153741 TCGGCGGGCAGGCGCATCA-(BRIDGE)-ATCCCGTCTCGTCTGCTGCTG         |
| 357. ddl_W_1_1        | 3338117 | 3337977 TGAGCTCGCACGGGCGGCG-(BRIDGE)-CTGGCGTCCAGTACGACGTCG         |
| 358. ddl_W_2_2        | 3337977 | 3337837 GCAGCAACGAGCAGCCATCTC-(BRIDGE)-ACGACCGAAAAGTGCAGCTCGTG     |
| 359. ddl_W_3_1        | 3337837 | 3337697 TGACGATCAACACCGGGAGCTTC-(BRIDGE)-GTGTGTGTCGGCGGCGAGCA      |
| 360. ddl_W_4_2        | 3337697 | 3337557 TCCCGTACTGCACGGCCCG-(BRIDGE)-CTCAGGTCAAATCAGGATCGGGCAC     |
| 361. ddl_W_5_1        | 3337557 | 3337417 TCGGCTGAGGACTTCCGGTGGG-(BRIDGE)-TACGGCGAGGACGGCAGCAT       |
| 362. ddl_W_6_2        | 3337417 | 3337277 CGGGTGTGAGTTGGGATCAACTGC-(BRIDGE)-TGCGTACGCGGTGCTGCGTC     |
| 363. ddl_W_7_1        | 3337277 | 3337137 CGCTGGGGGAGATCCGGGTG-(BRIDGE)-CCGCCGCGTCCGCGGGCC           |
| 364. ddl_W_8_2        | 3337137 | 3336997 CTGGCGATCCGGGCGTTCG-(BRIDGE)-GCCGGGGTCCGGGGACGCGCA         |
| 365. ddl_W_9_1        | 3336997 | 3336857 GCGGCCAGCGGTGTCGACT-(BRIDGE)-GGCTATCGACTGCCGGGTCT          |
| 366. ddl_C_1_2        | 3338067 | 3337927 CCACCGACAGCCCTTATGACAGACC-(BRIDGE)-GGTACCAGGTCAGGACAGC     |
| 367. ddl_C_2_1        | 3337927 | 3337787 GGTCTGTAGCACTACAACCTGCAGA-(BRIDGE)-CGAACCCCGGAGTCCAGG      |
| 368. ddl_C_3_2        | 3337787 | 3337647 GGTGATACCCACCGCATCACGT-(BRIDGE)-CGGATCGCGCGGACGCGCA        |
| 369. ddl_C_4_1        | 3337647 | 3337507 ACCAACTGGCCACACGCGG-(BRIDGE)-GCCACCCCGGCGAGTTCGAG          |
| 370. ddl_C_5_2        | 3337507 | 3337367 GCACACCGGCGCCACGTAG-(BRIDGE)-ACTCTGGCGGTGCACTGTGC          |
| 371. ddl_C_6_1        | 3337367 | 3337227 CGGTAAAGCCAGCCGTTTCG-(BRIDGE)-CTCGACGATGACCTAGGGTCTATGCC   |
| 372. ddl_C_7_2        | 3337227 | 3337087 TCGCGCCGCTGATCGCGG-(BRIDGE)-TACTTGGTTGCGAAGTCTAGAAAGAGTCC  |
| 373. ddl_C_8_1        | 3337087 | 3336947 CCAATTGCGTCTGCTGCTGAGA-(BRIDGE)-GTCGGTGAGGAAGAAAGTCCACCC   |
| 374. ddl_C_9_2        | 3336947 | 3336807 TTGATCTCGTTGATCACCGGACCGT-(BRIDGE)-CACGCCCGGGCCAATGTCG     |
| 375. ddl_C_9_2a       | 3336947 | 3336807 TTGATCTCGTTGATCACCGGACCGT-(BRIDGE)-CACGCCCGGGCCAATGTCG     |
| 376. oxyR-ahpC_W_1_1  | 2726940 | 2726800 CGCGGCTTGAGCTTTCTATACTATTGATT-(BRIDGE)-CGTCCGCGCTGGCCAGCA  |
| 377. oxyR-ahpC_W_2_1  | 2726800 | 2726660 GCACTCGCAGTACCTCATCGAGTT-(BRIDGE)-CCCGGCAACAGATCCCGG       |
| 378. oxyR-ahpC_W_3_1  | 2726660 | 2726520 TCGCGCTTGATGTCGGAGAGCA-(BRIDGE)-GCGTCCACCGAACCGGCGG        |
| 379. oxyR-ahpC_W_4_1  | 2726520 | 2726380 TGCTGAACCGCGGATCTCG-(BRIDGE)-TCGGAAAGGGTAACGTTTTGAGGTCG    |
| 380. oxyR-ahpC_W_5_1  | 2726380 | 2726240 ACAGTCAACCGGATGAGAGC-(BRIDGE)-GTAGGCACACGAACGTAAGTCTTTC    |
| 381. oxyR-ahpC_W_6_1  | 2726240 | 2726100 TCGGTGACAGGCAAGGTGATATACAC-(BRIDGE)-GGTAGCTGGTAGGCGGGAA    |
| 382. oxyR-ahpC_W_7_1  | 2726100 | 2725960 GTCGACGTTGCGGCGAGCGG-(BRIDGE)-CATATTTATCGGCATCGCCCAAGAG    |
| 383. oxyR-ahpC_W_8_1  | 2725960 | 2725820 GACCAGACGCTCATGCTGCC-(BRIDGE)-TGGTCCGAAGCCGCTCTCGG         |
| 384. oxyR-ahpC_W_9_1  | 2725820 | 2725680 CCGATTCTGTCGCCCTGCC-(BRIDGE)-CAACACCCGGCGGTTGTCG           |
| 385. oxyR-ahpC_W_10_1 | 2725680 | 2725540 GCAACACCCAGCCGATCG-(BRIDGE)-GGCGGACGAATCGTTTGGT            |
| 386. oxyR-ahpC_W_11_1 | 2725540 | 2725400 CGCCGCGCCGCTGGCCG-(BRIDGE)-CTGCGCGCCCGTCCGGAGC             |
| 387. oxyR-ahpC_C_1_2  | 2726890 | 2726750 GCTCAATCACCCGACGAGCG-(BRIDGE)-GCTGGCAACTCTCAAGGCTTC        |
| 388. oxyR-ahpC_C_2_2  | 2726750 | 2726610 AGGGGACCCGACGCTAGAC-(BRIDGE)-CCAACAACGAGATCCAGTTCGTCTCGG   |
| 389. oxyR-ahpC_C_3_2  | 2726610 | 2726470 ACCGCGTACCTTATCTGTCGACC-(BRIDGE)-TTCCAGTGGCGTGCACAGCAC     |

| # Probe name              | Start   | End Sequence                                                        |
|---------------------------|---------|---------------------------------------------------------------------|
| 390. oxyR-ahpC_C_4_2      | 2726470 | 2726330 TCGATTGACAGCGAATTCGCGCA-(BRIDGE)-TGGCGGGTGGTGTCTTTTGGC      |
| 391. oxyR-ahpC_C_5_2      | 2726330 | 2726190 ACCAGTGACGAACACCCAGGCAAG-(BRIDGE)-TCATGCCACTGCTAACCATTTGGCC |
| 392. oxyR-ahpC_C_6_2      | 2726190 | 2726050 TGCATTGTCCGCTTTGATGATGAGGAGAG-(BRIDGE)-GCCCGCCACGGCCGGCTAG  |
| 393. oxyR-ahpC_C_7_2      | 2726050 | 2725910 CACCGCGGCGAACCGCGCAA-(BRIDGE)-CTTGCCGAAAGACATGCCCTGG        |
| 394. oxyR-ahpC_C_8_2      | 2725910 | 2725770 GCGGTGACGCGCACCCGCTG-(BRIDGE)-CGCCGGTACGCACTGCACG           |
| 395. oxyR-ahpC_C_9_2      | 2725770 | 2725630 CGGAATCAGTGTACCCAGCC-(BRIDGE)-ACTTCTCGCGCCGCGGAAA           |
| 396. oxyR-ahpC_C_9_2a     | 2725770 | 2725630 CGGAATCAGTGTCCCGCCAGCC-(BRIDGE)-ACTTCTCGCGCCGCGGAAA         |
| 397. oxyR-ahpC_C_10_2     | 2725630 | 2725490 TCCCGCAAGACGCTGGTAGG-(BRIDGE)-CGGGCTTGCCTGGCCAGGT           |
| 398. embC_W_1_1           | 4239643 | 4239782 CGGTGGACCTACGGACCGC-(BRIDGE)-TGGACAAGTGCCCTGGCAGC           |
| 399. embC_W_2_1           | 4239783 | 4239922 GGCTACCATCTACTCCGTGCGC-(BRIDGE)-CTCTCGCCGACCCCGTTT          |
| 400. embC_W_3_1           | 4239923 | 4240062 TGGCCCAAAACGGCAGCTT-(BRIDGE)-GACGCGGGAGCAAATACCGG           |
| 401. embC_W_4_1           | 4240063 | 4240202 AACGGTGCCCAAGCAGGCGC-(BRIDGE)-CGCCAGTGTGAGGACCCGC           |
| 402. embC_W_5_1           | 4240203 | 4240342 GCGGTTGACATTACCGCGCAC-(BRIDGE)-CTAAGCCGTGATCGCGGGC          |
| 403. embC_W_6_1           | 4240343 | 4240482 TTCACCGACCTGGCGGGCC-(BRIDGE)-GCCGATCGGGTCCGCGCGGA           |
| 404. embC_W_7_1           | 4240483 | 4240622 CGGTGCACATCTGGACACCG-(BRIDGE)-GGCGCCACCCGGTCTGAGCT          |
| 405. embC_W_8_1           | 4240623 | 4240762 GCAGGACGGCTACATCTGACCATG-(BRIDGE)-CCGACGGCATGCGGCACCGG      |
| 406. embC_W_9_1           | 4240763 | 4240902 GGCCAGTATCTGGATGCGCTACC-(BRIDGE)-GCCCGGGTGTCCGAGCATGC       |
| 407. embC_W_10_1          | 4240903 | 4241042 TGCTGGCTGCCGTGGACA-(BRIDGE)-CACCTGGCATGGCGCTCA              |
| 408. embC_W_11_1          | 4241043 | 4241182 TGACCCTGTTCTCCGGCGCC-(BRIDGE)-ACGGCCTTCGGCCGACCGG           |
| 409. embC_W_12_1          | 4241183 | 4241322 ACCGTACCCGATCCCGAT-(BRIDGE)-ACGGGATCGCCTCGATCGG             |
| 410. embC_W_13_1          | 4241323 | 4241462 GCAGGGCTGATCGCCCGC-(BRIDGE)-CTTCTGATCAGACCTTCGCGGGC         |
| 411. embC_W_14_1          | 4241463 | 4241602 CACGATCATTTCTCTCGCATGATG-(BRIDGE)-GCTTCGCGGTGCTGGCCTTG      |
| 412. embC_W_15_1          | 4241603 | 4241742 GTGTTCCGCCCGTGGTGGT-(BRIDGE)-TTCACCCGACAAAGTGGACCAT         |
| 413. embC_W_16_1          | 4241743 | 4241882 GCTACGGTGTGGTGTGCTG-(BRIDGE)-CTTCTGTTGCCCTGTGCTTCG          |
| 414. embC_W_17_1          | 4241883 | 4242022 TGGTTGCTGGTCTTTTCGAGGTG-(BRIDGE)-TGTAGCGCATGGTTCACCTTCG     |
| 415. embC_W_18_1          | 4242023 | 4242162 CCCAACGAGGATGCTGGC-(BRIDGE)-GTATCGTACCCAGCGATGATTTCC        |
| 416. embC_W_19_1          | 4242163 | 4242302 CAGTTTCTCAACGACGACGGC-(BRIDGE)-GCCGGTACCCGCGCGTTGG          |
| 417. embC_W_19_1a         | 4242163 | 4242302 CAGTTTCTCAACGACGACGGC-(BRIDGE)-GCCGGTACCCGCGCGTTGT          |
| 418. embC_W_20_1          | 4242303 | 4242442 GGCGAGCCGCGGTGACGGT-(BRIDGE)-TGATCACCGGACGCAACCCG           |
| 419. embC_W_21_1          | 4242443 | 4242582 GCCACGACGAGCAAGCGGC-(BRIDGE)-CCCAGCATGCTGGGTCGGG            |
| 420. embC_W_22_1          | 4242583 | 4242722 CCGACGACGAGGATCTGGCGC-(BRIDGE)-CGCCGGACACCAGGTTGGT          |
| 421. embC_W_23_1          | 4242723 | 4242862 AACGCCCTTCGGCCACCAA-(BRIDGE)-CGCAGCACTGGATCCCGCTC           |
| 422. embC_W_24_1          | 4242863 | 4243002 GCGCAACACCGTGGCCAG-(BRIDGE)-TACGGCTGACGAGACACCC             |
| 423. embC_C_1_2           | 4239693 | 4239832 CCGCAGGTTGATGCTTTATGTG-(BRIDGE)-AGCACGAACGGCCAATGTCTT       |
| 424. embC_C_2_2           | 4239833 | 4239972 CCTCGGCTTGGGATGGCC-(BRIDGE)-CCCAGCACAGCGACGTA               |
| 425. embC_C_3_2           | 4239973 | 4240112 GCCAGCACAGCGCTAGCAGA-(BRIDGE)-TGTTCAAGTCGGTGGCCACGTAGC      |
| 426. embC_C_4_2           | 4240113 | 4240252 GGCTGGCAGGGGACGGTGA-(BRIDGE)-CAGGTCGCTGGTGGCCCGTTG          |
| 427. embC_C_5_2           | 4240253 | 4240392 GGGGACATTACGCACCAAGCAC-(BRIDGE)-GCATTGGTCCCTGCACCATGCC      |
| 428. embC_C_6_2           | 4240393 | 4240532 GCGGTGACCCGGGTGCTCA-(BRIDGE)-TGCTGTAGCGGGTATCCACGT          |
| 429. embC_C_7_2           | 4240533 | 4240672 CTTAGCGGGCTGGGGTGC-(BRIDGE)-GGTCGACACAGCGCGCGG              |
| 430. embC_C_8_2           | 4240673 | 4240812 ACCAGGGTGTCCAGACCGC-(BRIDGE)-AACAGCGGTAGTAGTTGGCCATATAGC    |
| 431. embC_C_9_2           | 4240813 | 4240952 AAGCGCCTCGGGTGTCCG-(BRIDGE)-TGACCTACGGCTGATTACCCACC         |
| 432. embC_C_10_2          | 4240953 | 4241092 GCGTGGCCAGCCGCGGAA-(BRIDGE)-CCAGGTACGAGGATGCCGAGG           |
| 433. embC_C_11_2          | 4241093 | 4241232 ACCGCCCTCCACCGAGCA-(BRIDGE)-CGTAGCGGCCGATCGCGAC             |
| 434. embC_C_12_2          | 4241233 | 4241372 GAACGCGGTGACGATGGT-(BRIDGE)-GCTTGAGGAGTTGGCTGGATCT          |
| 435. embC_C_13_2          | 4241373 | 4241512 CAGGCTGGCCCTACGGCAC-(BRIDGE)-CATTGCCACGATACCCGAGC           |
| 436. embC_C_14_2          | 4241513 | 4241652 TGAATGCGGCCCTTACGTAACGA-(BRIDGE)-GCCAACCCCGCAACACCCC        |
| 437. embC_C_15_2          | 4241653 | 4241792 CAAGCGCCCGACGACCGC-(BRIDGE)-ACACGTACCACAGCGGTTGACA          |
| 438. embC_C_16_2          | 4241793 | 4241932 CGACCATGGCACACCGAAGTTGG-(BRIDGE)-TGTTCCGGCCCGTACCCGT        |
| 439. embC_C_17_2          | 4241933 | 4242072 CCTAAACGGGTTGGCTGGC-(BRIDGE)-CCAACCGACACGCGGGTA             |
| 440. embC_C_18_2          | 4242073 | 4242212 GGCCAAAGCCTGATGTTAGACCG-(BRIDGE)-CTTCAGACAGGCGGCTCCCA       |
| 441. embC_C_19_2          | 4242213 | 4242352 GGAATGCCGTTGGTGTGAAGG-(BRIDGE)-CGGTGCGCCGCTGGTGGCCC         |
| 442. embC_C_20_2          | 4242353 | 4242492 GCGCGGGAGCGGTTGATCC-(BRIDGE)-CGCTGCTGTTGGTGGGCG             |
| 443. embC_C_21_2          | 4242493 | 4242632 CCAGCAGCGGCCCTGTCC-(BRIDGE)-GCGCGCACCGACGTCGGCG             |
| 444. embC_C_22_2          | 4242633 | 4242772 GCGCAGGTTGCGCCAGGCGC-(BRIDGE)-CGTGCCACCCGCGGAATCC           |
| 445. embC_C_22_2a         | 4242633 | 4242772 GCGCAGGTTACGCCAGGCGC-(BRIDGE)-CGTGCCACCCGCGGAATCC           |
| 446. embC_C_23_2          | 4242773 | 4242912 GCGCCACACGTTCTGCAG-(BRIDGE)-CCGAACCGTCCGGCAGGAT             |
| 447. embC_C_24_2          | 4242913 | 4243052 CCGGTGAGTTGGCTTCCGGC-(BRIDGE)-TCAACCGCTGTAACCGGCC           |
| 448. iniB-inaI-inaI_W_1_1 | 409162  | 409301 CGGGGTGAGGCGGAATCCATAGC-(BRIDGE)-ATCCACGGATAAGTTCGGACCCG     |
| 449. iniB-inaI-inaI_W_2_1 | 409302  | 409441 TTGTTGCGCTCCGGGACG-(BRIDGE)-GTCGATGGCACAGCGCCGGT             |
| 450. iniB-inaI-inaI_W_3_1 | 409442  | 409581 CGTCCGCTCGGCATGGCT-(BRIDGE)-GGCCATGACCAAGTCCGGGG             |
| 451. iniB-inaI-inaI_W_4_1 | 409582  | 409721 AGGTTGGCTGCTCCGCC-(BRIDGE)-TTGCGCAGGACGCTGCCAATG             |
| 452. iniB-inaI-inaI_W_5_1 | 409722  | 409861 GGTCTGGGTGCTCAGGCGG-(BRIDGE)-GCGTCAAGCGGTTGTTCCGG            |
| 453. iniB-inaI-inaI_W_6_1 | 409862  | 410001 AGATCGAGTTGCCGCCAGG-(BRIDGE)-TATGGCTTTGGCGCGGGG              |
| 454. iniB-inaI-inaI_W_7_1 | 410002  | 410141 GGGTCAGCAGCAACGAGTTG-(BRIDGE)-GTGCCGTTGGCGCTGGTGTG           |
| 455. iniB-inaI-inaI_W_8_1 | 410142  | 410281 GCCGCTGGCGCGCGGGT-(BRIDGE)-GCTTCAACGCAAGCGCCA                |

| # Probe name                | Start  | End Sequence                                                            |
|-----------------------------|--------|-------------------------------------------------------------------------|
| 456. iniB-iniA-iniC_W_9_1   | 410282 | 410421 CGGGGTCGGCGGGGGCACACG-(BRIDGE)-GGGCTTCGGAGCGGTGGGGC              |
| 457. iniB-iniA-iniC_W_10_1  | 410422 | 410561 GGCGGCTATGGCGGCATGAAC-(BRIDGE)-GCGACATCCTGGGCCACGAGG             |
| 458. iniB-iniA-iniC_W_11_1  | 410562 | 410701 CCACGATAAGCCCGGAGCCA-(BRIDGE)-CCGCCAGTGACCGATGCGCC               |
| 459. iniB-iniA-iniC_W_12_1  | 410702 | 410841 CGAACCCGGTGGGGACGTTTCATGG-(BRIDGE)-TTCGGTGTGGACGTGGTACGGA        |
| 460. iniB-iniA-iniC_W_13_1  | 410842 | 410981 TCGATCACACTATCGCCATCGCCAAA-(BRIDGE)-TCCCGCCGGTTGTGCGCA           |
| 461. iniB-iniA-iniC_W_14_1  | 410982 | 411121 TCGTTGCTCAACCTGCCCGC-(BRIDGE)-CTGAACGAGCGTGGTATCTAGTACAGC        |
| 462. iniB-iniA-iniC_W_15_1  | 411122 | 411261 TGACATTCCTCGATGACATCAGCA-(BRIDGE)-GGCGCAGTAGGCGATGACG            |
| 463. iniB-iniA-iniC_W_16_1  | 411262 | 411401 TCGGACAGCCCCACCTGTGC-(BRIDGE)-CCGATGTGCTCGGGCTCCG                |
| 464. iniB-iniA-iniC_W_17_1  | 411402 | 411541 GCGGTCGTGGCCACCAAGAC-(BRIDGE)-GCGACGCTGGGGCTGTACC                |
| 465. iniB-iniA-iniC_W_18_1  | 411542 | 411681 TCACGCTTAACGACAAAGAGCTCAACG-(BRIDGE)-CGACCTGTATCCGCGCTGGC        |
| 466. iniB-iniA-iniC_W_19_1  | 411682 | 411821 TGGCGGTGTCTTAGTTCGGAACATA-(BRIDGE)-AAGAGTCCAACCTTCGCGCATCGT      |
| 467. iniB-iniA-iniC_W_20_1  | 411822 | 411961 CCGGTTCAACGACCTGACTGCTGA-(BRIDGE)-TCGGTGGTCAACGACCCGAACC         |
| 468. iniB-iniA-iniC_W_21_1  | 411962 | 412101 CGCCACAGCGGTGGCGACA-(BRIDGE)-CGTGGACCACGACCTACGAACCC             |
| 469. iniB-iniA-iniC_W_22_1  | 412102 | 412241 ACTTCGGCCGGTCAAAGCG-(BRIDGE)-ACTTCGTGGGGCATACCAAGCT              |
| 470. iniB-iniA-iniC_W_23_1  | 412242 | 412381 GTTGTCAACCCGCTATCGTGGG-(BRIDGE)-CTGGGCCGGATGGAATCGAAACCG         |
| 471. iniB-iniA-iniC_W_24_1  | 412382 | 412521 CGTCGTGAGCAACAATCACGGGATC-(BRIDGE)-GGCCGGTTGATCTCGGCC            |
| 472. iniB-iniA-iniC_W_25_1  | 412522 | 412661 CCGAGCGGGAACATCGAATTCGG-(BRIDGE)-GGCTCAAGATGATCCAGCGTCTGT        |
| 473. iniB-iniA-iniC_W_26_1  | 412662 | 412801 GCGGATTCGACGCAACATC-(BRIDGE)-GAATTCAGCGCAATTGGGTATCCTG           |
| 474. iniB-iniA-iniC_W_27_1  | 412802 | 412941 AGGCGGAAATCCACTCTGCTCAA-(BRIDGE)-CAGGCCTACCGGGTGGCCG             |
| 475. iniB-iniA-iniC_W_28_1  | 412942 | 413081 CCAACGTGCCGATCACCCGTC-(BRIDGE)-CGCCCTGTTCGGCGACGACA              |
| 476. iniB-iniA-iniC_W_29_1  | 413082 | 413221 TCGTTGCGATGCGATGCCTCC-(BRIDGE)-GGGCGGGGTGAGTTTCGAC               |
| 477. iniB-iniA-iniC_W_30_1  | 413222 | 413361 GTCGGCGGGTGGTGGGAGC-(BRIDGE)-GAGCGCACGTTGCGCGTGTCT               |
| 478. iniB-iniA-iniC_W_31_1  | 413362 | 413501 TTGCGGCGGGTGGTGGCGG-(BRIDGE)-CCTGGGCATCATCGGGGTGGC               |
| 479. iniB-iniA-iniC_W_32_1  | 413502 | 413641 TTGTGCGCGGACATCCG-(BRIDGE)-TATCCGACTTCTTGCCTGACCCG               |
| 480. iniB-iniA-iniC_W_33_1  | 413642 | 413781 CTGCTGAGCGCAGCGGGCT-(BRIDGE)-CTACCGGTGGACGCGGGCAT                |
| 481. iniB-iniA-iniC_W_34_1  | 413782 | 413921 CCGTACGTCATTGCGGACATCG-(BRIDGE)-GGTGGCGCTGCGCAATGTGA             |
| 482. iniB-iniA-iniC_W_34_1a | 413782 | 413921 CCCCACGTCATTGCGGACATCG-(BRIDGE)-GGTGGCGCTGCGCAATGTGA             |
| 483. iniB-iniA-iniC_W_35_1  | 413922 | 414061 CGGGACCAAGTCCGCGCT-(BRIDGE)-ACCCGTTGCTAGCCGACACC                 |
| 484. iniB-iniA-iniC_W_36_1  | 414062 | 414201 CGCGCGCGGTGCGCAGCGC-(BRIDGE)-CGCTGGGCTGGATCCCGC                  |
| 485. iniB-iniA-iniC_W_37_1  | 414202 | 414341 GTTTTCGAGCCCAAGGGCAGC-(BRIDGE)-CGAGCGATGGTGGCGGAGT               |
| 486. iniB-iniA-iniC_C_1_2   | 409212 | 409351 CCGGCCCGCGCTTAGGGG-(BRIDGE)-CTTCAATCGAAGAAGCTGTTCCCGG            |
| 487. iniB-iniA-iniC_C_2_2   | 409352 | 409491 GGATGTAATCGATAAGCGAGGTATCTTATTCC-(BRIDGE)-ATGAGATTTGGTGGCGGATATC |
| 488. iniB-iniA-iniC_C_3_2   | 409492 | 409631 CACCACATGGCCCGCACCG-(BRIDGE)-CCCGCCCGCGCTCACCG                   |
| 489. iniB-iniA-iniC_C_4_2   | 409632 | 409771 CGGTCGTGATGACGCTTGCAC-(BRIDGE)-CCGACCTGGGACAGCC                  |
| 490. iniB-iniA-iniC_C_5_2   | 409772 | 409911 GCCTCAATCAGCGAGTAAACCCAGA-(BRIDGE)-CGCCGCCCTGACCACCCAGA          |
| 491. iniB-iniA-iniC_C_6_2   | 409912 | 410051 CGCGCTCCACCGATCACAC-(BRIDGE)-GATGCCCGCTGGCCGCCGA                 |
| 492. iniB-iniA-iniC_C_7_2   | 410052 | 410191 GGCTGAGACCCGATCTGGCTAGC-(BRIDGE)-GCAGCGCTTACTGGCGAT              |
| 493. iniB-iniA-iniC_C_8_2   | 410192 | 410331 AGGCATAGCAGCGCCGTTCAAG-(BRIDGE)-CGCCAGGGCCCGGCTGA                |
| 494. iniB-iniA-iniC_C_9_2   | 410332 | 410471 CTTGGCCACCACGCCAGCCG-(BRIDGE)-GACCGTGTGACACTGCCAGT               |
| 495. iniB-iniA-iniC_C_10_2  | 410472 | 410611 ACGGGCGTGACACCGCGGT-(BRIDGE)-GGCTGGGCCCGCGCGGAAC                 |
| 496. iniB-iniA-iniC_C_11_2  | 410612 | 410751 GCTCGGCCCGGTGTCATC-(BRIDGE)-CCGGCGGCTGTGGTACC                    |
| 497. iniB-iniA-iniC_C_12_2  | 410752 | 410891 CGAGCGCAGTTCGATGGCG-(BRIDGE)-TCTGCTGTTTACGCTCAGATCAC             |
| 498. iniB-iniA-iniC_C_13_2  | 410892 | 411031 GGTACCGTGTGCGCCACTT-(BRIDGE)-CGTGGCGAGCCCGCTCAA                  |
| 499. iniB-iniA-iniC_C_14_2  | 411032 | 411171 CGGACTGCGGGTGGTATC-(BRIDGE)-AGCTTACGACGGTATCACACGG               |
| 500. iniB-iniA-iniC_C_15_2  | 411172 | 411311 GGCCGACGGTGGCGCTGT-(BRIDGE)-GACCCGCAACCTCGCGGC                   |
| 501. iniB-iniA-iniC_C_16_2  | 411312 | 411451 GGGCTGGGCGCGCGACCTC-(BRIDGE)-TCGCTGACCAAGACGGGA                  |
| 502. iniB-iniA-iniC_C_17_2  | 411452 | 411591 GGTTGCTGTAATCTGGCTGGT-(BRIDGE)-GATGTGCTGATTGGCATTGACGATCT        |
| 503. iniB-iniA-iniC_C_18_2  | 411592 | 411731 CGGAACCCGGCCGCTGCA-(BRIDGE)-AAGCACCTGCTGCTGAGAACTGA              |
| 504. iniB-iniA-iniC_C_19_2  | 411732 | 411871 ACTCGCTCCGTCGCGGGGA-(BRIDGE)-TCCAAATCCGAAGCAAGTCGGTACG           |
| 505. iniB-iniA-iniC_C_20_2  | 411872 | 412011 GGGCTTCCGTTTGGCGCG-(BRIDGE)-GGCGTCTTGGTGGCGGTG                   |
| 506. iniB-iniA-iniC_C_21_2  | 412012 | 412151 GTCACAGGATCGATTCGGCT-(BRIDGE)-AGCGAGCTGCTGGCCAAACG               |
| 507. iniB-iniA-iniC_C_22_2  | 412152 | 412291 CCCGCTCGGCAAGGAGCG-(BRIDGE)-ATAATCATTTATGGCCCCGCGCAG             |
| 508. iniB-iniA-iniC_C_23_2  | 412292 | 412431 GCCATAGGAACCCGATCCG-(BRIDGE)-GGTTTTGTTGCTCTTTATGCCATCCGG         |
| 509. iniB-iniA-iniC_C_24_2  | 412432 | 412571 GCTGCGCACCCGAGCAACC-(BRIDGE)-GGCGATCTCGCGGTAGTGGTCG              |
| 510. iniB-iniA-iniC_C_25_2  | 412572 | 412711 GGTGAGCGACCGGGTGTCTTTC-(BRIDGE)-GCAAGGTTGCTGTGACCTGGCTC          |
| 511. iniB-iniA-iniC_C_26_2  | 412712 | 412851 CGTCAAGGTTGGTCCAAGCCG-(BRIDGE)-CAAAAAACGTCGCCACGCTGACG           |
| 512. iniB-iniA-iniC_C_27_2  | 412852 | 412991 CACCGATGCGGTCAGCTGG-(BRIDGE)-GGGTGGCTCGGTGGCATCG                 |
| 513. iniB-iniA-iniC_C_28_2  | 412992 | 413131 CGTCCGGAAACCGGTCACAATCC-(BRIDGE)-GATCAGCTCGGCGGGTGTATCC          |
| 514. iniB-iniA-iniC_C_29_2  | 413132 | 413271 GCTGGCCACTCGACTTCCAGGTC-(BRIDGE)-TCCACCGAGGCACCCGCTC             |
| 515. iniB-iniA-iniC_C_30_2  | 413272 | 413411 CGCAACAGGAACACCACCGCA-(BRIDGE)-GGCCCGCGCGATCTCATCC               |
| 516. iniB-iniA-iniC_C_31_2  | 413412 | 413551 CCGAGGATCGCGTTCGATGC-(BRIDGE)-GAACCTGGTGGCGCAGTGTG               |
| 517. iniB-iniA-iniC_C_32_2  | 413552 | 413691 GCCAGTTCGCGAGCGCAT-(BRIDGE)-ATGCCGAACCGCTCGAGCAATTG              |
| 518. iniB-iniA-iniC_C_33_2  | 413692 | 413831 GCAATTCGACATCCGGATGCGCAAC-(BRIDGE)-TGTCGAGCGCTGCGCGAAC           |
| 519. iniB-iniA-iniC_C_34_2  | 413832 | 413971 CAAGCGGTATGCGCCTTAAGCA-(BRIDGE)-GCTTAGCATTGGAGTCTTCAAGGC         |
| 520. iniB-iniA-iniC_C_35_2  | 413972 | 414111 CGTTGCCCGGAAAGGCAAAAG-(BRIDGE)-AGCGCGGCGCGGGGCTC                 |
| 521. iniB-iniA-iniC_C_36_2  | 414112 | 414251 GCCAGTGTGCGCTGCGGCC-(BRIDGE)-AGGGCTGACCGCTCAGCGG                 |

| # Probe name                | Start   | End Sequence                                                                               |
|-----------------------------|---------|--------------------------------------------------------------------------------------------|
| 522. iniB-ina-ina-ic C_37_2 | 414252  | 414391 GCGCCACCCTGTGACACCCG-(BRIDGE)-ACACATTCTGAGCGCATGCCCTTATGA                           |
| 523. rrs-rrl_W_1_1          | 1471687 | 1471826 TTTTGTCCAGGATATTTCTAAATACCTTTGGCTCCCTTT-(BRIDGE)-CGTGTGTTTGAGAAGCTCAATAGTGTGTTTGGT |
| 524. rrs-rrl_W_2_1          | 1471827 | 1471966 GCGCAACCGGTGAGTAACACGTG-(BRIDGE)-TCCAAAGGGAGTGTGTTGGTTTGTGTTGG                     |
| 525. rrs-rrl_W_3_1          | 1471967 | 1472106 GGCCTATCAGCTTGTGGTGGGGTG-(BRIDGE)-GGTGATCGCCCTGCACCTCGGG                           |
| 526. rrs-rrl_W_4_1          | 1472107 | 1472246 AGCCTGATGCAGCGACGCCG-(BRIDGE)-ACGGCCTACCAAGGCGACGA                                 |
| 527. rrs-rrl_W_5_1          | 1472247 | 1472386 GCGGTAATACGTAGGGTGCAGCG-(BRIDGE)-CGTGGGGGATGACGGCCTTCG                             |
| 528. rrs-rrl_W_6_1          | 1472387 | 1472526 GGGAGACTGGAATTCCTGGTGTAGCG-(BRIDGE)-TTGTCGGGAATTACTGGGCGTAAAGAGC                   |
| 529. rrs-rrl_W_7_1          | 1472527 | 1472666 ACGCCGTAACCGTGGTACTAGG-(BRIDGE)-GTGGAATCGCAGATATCAGGAGGAACA                        |
| 530. rrs-rrl_W_8_1          | 1472667 | 1472806 GCGGAGCATGGGATTAATTCGATGCA-(BRIDGE)-TGTGGGTTTCTTCCCTGGGATCCG                       |
| 531. rrs-rrl_W_9_1          | 1472807 | 1472946 GTTAAGTCCCACAACGAGCGCA-(BRIDGE)-ACGCGAAGAACCCTTACCTGGGTTTGA                        |
| 532. rrs-rrl_W_10_1         | 1472947 | 1473086 CTTACACATGTACAATGGCCGGTAC-(BRIDGE)-ACCTTGTCTCATGTTGCCAGCAGC                        |
| 533. rrs-rrl_W_11_1         | 1473087 | 1473226 GCGGTGAATACGTTCCCGGGC-(BRIDGE)-AAAGGGCTGCGATGCCGCGA                                |
| 534. rrs-rrl_W_12_1         | 1473227 | 1473366 CCGTACCGGAAGGTGCGGCT-(BRIDGE)-CTGTACACACCCCGCTCACG                                 |
| 535. rrs-rrl_W_12_1a        | 1473227 | 1473366 CCGTACCGGAAGGTGCGGCT-(BRIDGE)-CTGTACACACCCCGCTCACG                                 |
| 536. rrs-rrl_W_13_1         | 1473367 | 1473506 ACCAACACACTGTGGGTCTGAGG-(BRIDGE)-GGATCACCTCTTCTAAGGAGCACCAC                        |
| 537. rrs-rrl_W_14_1         | 1473507 | 1473646 TGGCGTGTCTTTGTGCAATATCTTGGT-(BRIDGE)-CAACACTCGGACTGTCCAGGTGTTG                     |
| 538. rrs-rrl_W_15_1         | 1473647 | 1473786 TCCGAGGATTTCCGAATGGGGAACC-(BRIDGE)-TTTTGTGTGTTGTAAGTGTCTAAGGGCCG                   |
| 539. rrs-rrl_W_16_1         | 1473787 | 1473926 GCGAGCGAACCGGACAGG-(BRIDGE)-CAGCAGAGTGTGCTGCTACCC                                  |
| 540. rrs-rrl_W_17_1         | 1473927 | 1474066 CCGGGATGTTCTGCCGTAGACG-(BRIDGE)-CTAAACCGCAGCATGGGTAACCG                            |
| 541. rrs-rrl_W_18_1         | 1474067 | 1474206 ACTCCTCGATGACCGATAGCGGATTAGTA-(BRIDGE)-GTGAGAGCCCGGTACGCGAAAAC                     |
| 542. rrs-rrl_W_19_1         | 1474207 | 1474346 TGCCTTTGAAGAATGAGCTGCGAG-(BRIDGE)-CCGTGAGGGAATGTTGAAAGTACCCC                       |
| 543. rrs-rrl_W_20_1         | 1474347 | 1474486 GCGGAGTGTACTACCATGGCCAG-(BRIDGE)-TCAGGGACATGTCGCAAGGTTAACCC                        |
| 544. rrs-rrl_W_21_1         | 1474487 | 1474626 CCCGAAATGCAATAGGTGACGCTT-(BRIDGE)-GGTGAAGCGGGTAAAGCCG                              |
| 545. rrs-rrl_W_22_1         | 1474627 | 1474766 GGATAAGCTCCGTACGTCGAAAGGGA-(BRIDGE)-GCGTGGTTACCCGCGGAGGT                           |
| 546. rrs-rrl_W_23_1         | 1474767 | 1474906 TGCCTAATAGTCACTGGTCAAGTATTGTG-(BRIDGE)-ACAGCCAGATCGCCGGCTA                         |
| 547. rrs-rrl_W_24_1         | 1474907 | 1475046 GAGGGTGGGGAGTGAGAATGCA-(BRIDGE)-CGCCGATAATGTAGCGGGGCTCA                            |
| 548. rrs-rrl_W_25_1         | 1475047 | 1475186 GCGTAGTCGATGGACAACGGGTTGATTC-(BRIDGE)-GGCATGAGTAGCACAAGGCAAGTG                     |
| 549. rrs-rrl_W_26_1         | 1475187 | 1475326 AGTCAAGCGAAGGGGTGACGCA-(BRIDGE)-CCGTACCCGTGTGGGGCGC                                |
| 550. rrs-rrl_W_27_1         | 1475327 | 1475466 TCGGTGATCTCTGCTCCAAGAAA-(BRIDGE)-GGAAGTAGCCGTACCAAGTCAAGTGG                        |
| 551. rrs-rrl_W_28_1         | 1475467 | 1475606 TCGGAGAAAGGGGACCGGAAT-(BRIDGE)-GCCTCTAGCGAGCACACACAG                               |
| 552. rrs-rrl_W_29_1         | 1475607 | 1475746 CCTGCCCGGTGCTGGAAGGTTAAG-(BRIDGE)-ATCGTGAACACCTTCCGGTGGG                           |
| 553. rrs-rrl_W_30_1         | 1475747 | 1475886 GCACGAATGGCGTAACGACTTCTCAACT-(BRIDGE)-AGGACCCGTTAACCCGAAAGG                        |
| 554. rrs-rrl_W_31_1         | 1475887 | 1476026 GGGTTTGTAGGATAGGTGGGAGACTGT-(BRIDGE)-GTCTCAACATAGACTCGGCGAAATTGC                   |
| 555. rrs-rrl_W_32_1         | 1476027 | 1476166 CTGGGGCGGTTGCTCCTAAAATG-(BRIDGE)-GAAACCTGACGCCAGTTGGGGC                            |
| 556. rrs-rrl_W_33_1         | 1476167 | 1476306 ATCCGGCACCCCGAGTGGA-(BRIDGE)-TAACGAGGCGCCAAAGGTTCC                                 |
| 557. rrs-rrl_W_34_1         | 1476307 | 1476446 AGCAGGTCGCAAGGGTTGGG-(BRIDGE)-AGGGGTGTCGCTCAACGGGATAAAGG                           |
| 558. rrs-rrl_W_35_1         | 1476447 | 1476586 GGACGGAGCAACCTCTGGTGAC-(BRIDGE)-TGTTCGCCATTAAAGCGGCGACG                            |
| 559. rrs-rrl_W_36_1         | 1476587 | 1476726 CCCCGCAGAACACGGGTTCA-(BRIDGE)-CAGTTGTCGCCGAGGGGCA                                  |
| 560. rrs-rrl_W_37_1         | 1476727 | 1476866 CACGGCGTAGCCGTGCGTC-(BRIDGE)-ATAGGTGAGCTGGAAGCTCAGTAATGGG                          |
| 561. rrs-rrl_C_1_2          | 1471737 | 1471876 GGGGATCAAGAGCATGCCCCAAAATAAC-(BRIDGE)-CCTGAGCCAGGATCAAACCTCCAACA                   |
| 562. rrs-rrl_C_2_2          | 1471877 | 1472016 AGCAGCCGCGCAGGTTCTG-(BRIDGE)-GTATTAGACCCAGTTTCCAGGCTTATCCCG                        |
| 563. rrs-rrl_C_3_2          | 1472017 | 1472156 ACATGCATCCCGTGGTCTATCCG-(BRIDGE)-GGCCGGACACCTCTCAGGC                               |
| 564. rrs-rrl_C_4_2          | 1472157 | 1472296 TGGGCGGTATCTCAGTCCAGTGT-(BRIDGE)-TTCGTATGTTGAAAGAGGTTTACAACCC                      |
| 565. rrs-rrl_C_5_2          | 1472297 | 1472436 CGTCAATCCGAGAGAACCCGACC-(BRIDGE)-CAACGCGCAAAACCCTACGAGC                            |
| 566. rrs-rrl_C_6_2          | 1472437 | 1472576 GCTCACAGTTAAGCCGTGAGATTCACGAA-(BRIDGE)-AGAGACCCGCTTCGCCACC                         |
| 567. rrs-rrl_C_7_2          | 1472577 | 1472716 GCTCCTCAGCGTCACTTACTGCC-(BRIDGE)-GGTACTAATGCGTTAGCTACGGCAGC                        |
| 568. rrs-rrl_C_8_2          | 1472717 | 1472856 GCGCCGTAACCCAGGCGG-(BRIDGE)-ATCTCTAGACGCTCTGTGATGTC                                |
| 569. rrs-rrl_C_9_2          | 1472857 | 1472996 ACAGGCGCACAAAGGGAACGCT-(BRIDGE)-AGTCTCTCAGAGTCCCCACCATACG                          |
| 570. rrs-rrl_C_10_2         | 1472997 | 1473136 TCCTCCGAGTTGACCCCGC-(BRIDGE)-TGAGACCCGCTTTAAGGATTCGTTAAC                           |
| 571. rrs-rrl_C_11_2         | 1473137 | 1473276 CGAGTTCGACACCCGATCCGAAC-(BRIDGE)-TGGCTTCGGGTGTTACCGACTTTCA                         |
| 572. rrs-rrl_C_12_2         | 1473277 | 1473416 CCCTCCGAGGGTTAGGCCAC-(BRIDGE)-CCCCACAGTGGGGCGTTTTTC                                |
| 573. rrs-rrl_C_13_2         | 1473417 | 1473556 ACAAGAACCCTCAGGCTACG-(BRIDGE)-ACCCACACCAAGGCGGGT                                   |
| 574. rrs-rrl_C_14_2         | 1473557 | 1473696 CGCAACCACTATCCAGTTCTCAACACCAC-(BRIDGE)-ATGCCAAGGCATCCACCATGCG                      |
| 575. rrs-rrl_C_15_2         | 1473697 | 1473836 CCCACGCTCTCATCGGCTCTG-(BRIDGE)-TCCCGCACCTATATATTAGATGCGGG                          |
| 576. rrs-rrl_C_16_2         | 1473837 | 1473976 GATGTTTACCTCCCGGTTCC-(BRIDGE)-ACAACCCGACACACAACCC                                  |
| 577. rrs-rrl_C_17_2         | 1473977 | 1474116 GGGTAGCGCTGAGACATATCTCC-(BRIDGE)-CGGAATTGATACTAGGCAGGTGCCG                         |
| 578. rrs-rrl_C_17_2a        | 1473977 | 1474116 AGGTAGCGCTGAGACATATCTCC-(BRIDGE)-CGGAATTGATACTAGGCAGGTGCCG                         |
| 579. rrs-rrl_C_18_2         | 1474117 | 1474256 TCCACGGGCGGCTGCTACT-(BRIDGE)-AGGTACTTTTCACTCCCTCCCG                                |
| 580. rrs-rrl_C_19_2         | 1474257 | 1474396 CTGACGATTGTAGGCACACGGTTTC-(BRIDGE)-GCTTTCGCTGCGGCTACCCC                            |
| 581. rrs-rrl_C_19_2a        | 1474257 | 1474396 CTGACGATTGTAGGCACACGGTTTC-(BRIDGE)-GCTTTCGCTGCGGCTATCCC                            |
| 582. rrs-rrl_C_20_2         | 1474397 | 1474536 CGTGTGGGTGCGCCTATTCAGACT-(BRIDGE)-TTCAACCTAAGTGGGTTGCGGGCTC                        |
| 583. rrs-rrl_C_21_2         | 1474537 | 1474676 CCTACCACAGCTATCCCTCAGTC-(BRIDGE)-AGTAGGGCCATCGGCCATCC                              |
| 584. rrs-rrl_C_22_2         | 1474677 | 1474816 CCGAGTTTGGCTGACGCTCAGTAACCT-(BRIDGE)-CTTCCACTTACACACGCTTGGG                        |
| 585. rrs-rrl_C_23_2         | 1474817 | 1474956 CCTGGTGTCTTTCGACTGCACATC-(BRIDGE)-GATGTGCCGCGGCTCGGG                               |
| 586. rrs-rrl_C_24_2         | 1474957 | 1475096 CCTACCACACCCACCAAGGTG-(BRIDGE)-TTGGTCTTCGGCGGGCAAGGT                               |
| 587. rrs-rrl_C_25_2         | 1475097 | 1475236 CTGGCTGGCCAGGAACCC-(BRIDGE)-TGGGTGTTAGTACCGCTGATTCTG                               |

| # Probe name         | Start   | End Sequence                                                                  |
|----------------------|---------|-------------------------------------------------------------------------------|
| 588. rrs-rrl_C_26_2  | 1475237 | 1475376 CGAAGGGGAGTGATCGATCCGGTTT-(BRIDGE)-TCCTACCGGCTTGCCCCAG                |
| 589. rrs-rrl_C_27_2  | 1475377 | 1475516 GAGCGACGGATTTCCTATCGCTC-(BRIDGE)-ACCACCTGTGTCGGTTTGGGGT               |
| 590. rrs-rrl_C_28_2  | 1475517 | 1475656 CTCGTACGCCTTGGTATGCTCTACCTG-(BRIDGE)-CACTGGTTTCTGCGACCGGATCCC         |
| 591. rrs-rrl_C_29_2  | 1475657 | 1475796 GGACCTGTGTTTTAGTAAACAGTCGCTCCT-(BRIDGE)-TTTACTGGGGCTTAAATTCCTCGCTTACC |
| 592. rrs-rrl_C_30_2  | 1475797 | 1475936 CCTTAGGATGGTTATAGTACCACCGCCG-(BRIDGE)-AACGAGCATCTTACTCGTAGTCAATTTCCG  |
| 593. rrs-rrl_C_31_2  | 1475937 | 1476076 TTTTCGTCTGCCGCGCT-(BRIDGE)-TCAGAGTGGTATTTCAACAACGACTCCGC              |
| 594. rrs-rrl_C_31_2a | 1475937 | 1476076 TTTTCGTCTGCCGCGCT-(BRIDGE)-TCAGAGTGGTATTTCAACAATGACTCCGC              |
| 595. rrs-rrl_C_32_2  | 1476077 | 1476216 GGGTTCGAGGTAGATGCCAATACGA-(BRIDGE)-CGCCACCTGATTGCCGTCAG               |
| 596. rrs-rrl_C_33_2  | 1476217 | 1476356 GCAGTCAAGCTCCCTTGTGATTTACT-(BRIDGE)-GATCAGCTGTTATCCCCGGGTAC           |
| 597. rrs-rrl_C_34_2  | 1476357 | 1476496 TCCCGTCGATATGGACTCTTGGGGAA-(BRIDGE)-GTCTCACGACGTTCTAAACCCAGCTCG       |
| 598. rrs-rrl_C_35_2  | 1476497 | 1476636 CGCGCGGATAGAGACCGAACT-(BRIDGE)-TTATCTGACCGAACTGGCTATCCAGC             |
| 599. rrs-rrl_C_36_2  | 1476637 | 1476776 GTTTCGCCCTTAGATGCTTTCAGCGG-(BRIDGE)-GTTAGCACAGTTCCTACACCCATTACTG      |
| 600. rrs-rrl_C_37_2  | 1476777 | 1476916 GGAGGGTGTGTAAGTTTTTCGGCCG-(BRIDGE)-CCGCTGTGGCCCGCTAACT                |
| 601. alr_W_1_1       | 3841573 | 3841433 GGGGCAATCGGGCACAGGCC-(BRIDGE)-CTATTGACGCCAACCATCATGCGGC               |
| 602. alr_W_2_1       | 3841433 | 3841293 GCCGAGGCCATGGTGGATCTGG-(BRIDGE)-GGAATACTGCTCAGTGAACCGTTCTGGG          |
| 603. alr_W_3_1       | 3841293 | 3841153 GAGCCGGTGCAGCCGAACTC-(BRIDGE)-GCGCTATTGAACACAACGTGCGGG                |
| 604. alr_W_4_1       | 3841153 | 3841013 GTCCGCGTCTCGCTGCG-(BRIDGE)-GGCGTCCACCCGTCGACGA                        |
| 605. alr_W_5_1       | 3841013 | 3840873 GACCGCTTACGCCAAGCCA-(BRIDGE)-CCAACCTGACGAACTGTTGCACGC                 |
| 606. alr_W_6_1       | 3840873 | 3840733 CGCGAACCAAGGGGTGCGGTT-(BRIDGE)-TGGCCGAGGACGCGTCCGG                    |
| 607. alr_W_7_1       | 3840733 | 3840593 GGGCTGGTCCCGCGATGAC-(BRIDGE)-GAGGTGGCGCATCTATCGAACTCATCA              |
| 608. alr_W_8_1       | 3840593 | 3840453 CGCGGTGTTCCGGTCTGCTGG-(BRIDGE)-CGTAAATGTGCTGTTGCGCTGG                 |
| 609. alr_W_9_1       | 3840453 | 3840313 GCGATTTTGTCCGGCCGGGC-(BRIDGE)-GCGGGCGGCTGGAGGTGCTG                    |
| 610. alr_W_10_1      | 3840313 | 3840173 GAGCCGTGAGGGTATCCGAGA-(BRIDGE)-ATCCGGGTGAGCCACCGC                     |
| 611. alr_W_11_1      | 3840173 | 3840033 CTCTCCGGTCCGCTCGGTG-(BRIDGE)-CGACCGAAAGCCAGGCTGG                      |
| 612. alr_C_1_2       | 3841523 | 3841383 CTCGGTGGTGGTTGCCGATCAC-(BRIDGE)-CGTTTGGCTTCCGACATTCTCCAG              |
| 613. alr_C_2_2       | 3841383 | 3841243 GCCCGCCATCTGCTGTG-(BRIDGE)-CGCGTGGCCGGCGTCTCAC                        |
| 614. alr_C_3_2       | 3841243 | 3841103 CCTTGACCACCCCATCAGCTG-(BRIDGE)-GTAATGCCATCAGCGCGCAGCG                 |
| 615. alr_C_4_2       | 3841103 | 3840963 GCAGGCCAGCACCGGTGCG-(BRIDGE)-TCGGTCCGGCCGGTCCGG                       |
| 616. alr_C_5_2       | 3840963 | 3840823 CGGTATCCACTTTCAGGTCACCG-(BRIDGE)-GTAACCATATGCGACATCAGCCCCCG           |
| 617. alr_C_6_2       | 3840823 | 3840683 GATGGAATCGTACGCTTGTCCGG-(BRIDGE)-AGGTCCGGGCGCGCATAGT                  |
| 618. alr_C_7_2       | 3840683 | 3840543 GCCCGACAGGTGGAACGTC-(BRIDGE)-CGCCCTCCCCCGCAGGAATC                     |
| 619. alr_C_8_2       | 3840543 | 3840403 GCGATCCATGTGTGCCATACGACA-(BRIDGE)-CCCCACCCGGGGCATCGTC                 |
| 620. alr_C_9_2       | 3840403 | 3840263 ACCATGAACTGATCCATGCAGATCCG-(BRIDGE)-ATGGTCCGACAAGATCGGCC              |
| 621. alr_C_10_2      | 3840263 | 3840123 GGGTGGTACCACTTCGATGTTGG-(BRIDGE)-GGCAGCGTCCCGTCCCGCC                  |
| 622. ethA_W_1_1      | 4327673 | 4327533 AGGTGGTACCCTGGCAGCTTACTA-(BRIDGE)-AGCGGACGCTCTCGAGAAGG                |
| 623. ethA_W_2_1      | 4327533 | 4327393 CTGGCACTCGAGGACCGTTG-(BRIDGE)-CGTGTGATAGTGTGACATCTCGTTGA              |
| 624. ethA_W_3_1      | 4327393 | 4327253 TCCCTGGACCGGACGCGAGG-(BRIDGE)-CCCAGCAAGAGCTACGCCATCC                  |
| 625. ethA_W_4_1      | 4327253 | 4327113 GGAAACCGCTGACCGTTTACATC-(BRIDGE)-CGATCGCGGACGGCAAGCCC                 |
| 626. ethA_W_5_1      | 4327113 | 4326973 GCCGATCATCCATCCGACGACTG-(BRIDGE)-CAAAGCCACGGCACGCTCAGC                |
| 627. ethA_W_6_1      | 4326973 | 4326833 GCGCTACCCACCTACATCGTGT-(BRIDGE)-GCCCCGAGACCTCGACTACGAC                |
| 628. ethA_W_7_1      | 4326833 | 4326693 AGAAGTGGCCACGGCGCATG-(BRIDGE)-CGCAGCCAGACCGGGACGGC                    |
| 629. ethA_W_8_1      | 4326693 | 4326553 ACCTGTTCCGGGCCATTCTGTA-(BRIDGE)-CGGAAGATGTTCTGAGCCTGATCCA             |
| 630. ethA_W_8_1a     | 4326553 | 4326413 ACCTGGTCCGGGCCATTCTGTA-(BRIDGE)-CGGAAGATGTTCTGAGCCTGATCCA             |
| 631. ethA_W_9_1      | 4326413 | 4326273 AGCTTTTGGTGGGGCAGCG-(BRIDGE)-CGGGAAGTTCGAGGTGGTACC                    |
| 632. ethA_W_10_1     | 4326273 | 4326133 AGGCCGACCTGGTTCGGAG-(BRIDGE)-CGACTATCGACGGACAACAAGTGGACA              |
| 633. ethA_W_11_1     | 4326133 | 4326003 CGCTCGTGGACGAGCTGCC-(BRIDGE)-TTTGTCTGCTGTTGTAATTACATGGACG             |
| 634. ethA_W_12_1     | 4326003 | 4325993 CCGGTGGGGGTTAGCTTTAGCGAC-(BRIDGE)-CAAGCAGGTTTCGCTACACCG               |
| 635. ethA_W_13_1     | 4325993 | 4325853 GGCACCGTCTTGGTCTTGTG-(BRIDGE)-GGTTTAGCCCGGTTTAGGCCATAGT               |
| 636. ethA_C_1_2      | 4327623 | 4327483 GGCCGTCGCGGACGATCGT-(BRIDGE)-TATCAACGTAATGTCGAGGCCGTAACG              |
| 637. ethA_C_2_2      | 4327483 | 4327343 GTGCTCGGTATGGATCCACGC-(BRIDGE)-TGCCGCCATGGATTCCCGC                    |
| 638. ethA_C_2_2a     | 4327483 | 4327343 GTGCTCGGTATGGATCCACGC-(BRIDGE)-TGCTGCCATGGATTCCCGC                    |
| 639. ethA_C_3_2      | 4327343 | 4327203 TCCGGGATAACGGAACAAATCCAGG-(BRIDGE)-GGCCCGGTGCTCTTGACGT                |
| 640. ethA_C_3_2a     | 4327343 | 4327203 TCCGGGATAACGGAACAAATCCAGG-(BRIDGE)-GGCCCGGTGCTCTTGACGT                |
| 641. ethA_C_4_2      | 4327203 | 4327063 GAACCGGATATGCCTGTCGATTCCATACAT-(BRIDGE)-CACAGAAAGAGGAATTCGAGGTGAGGG   |
| 642. ethA_C_4_2a     | 4327203 | 4327063 GAACCGGATATGCCTGTCGATTCCATACAT-(BRIDGE)-CGCAGAAAGAGGAATTCGAGGTGAGGG   |
| 643. ethA_C_5_2      | 4327063 | 4326923 CCTCGTGTAGTTGATGAGCCGCTG-(BRIDGE)-CACTGCCGATCAGCAGATGTTCTTAGC         |
| 644. ethA_C_6_2      | 4326923 | 4326783 GAGCGTGACCGCGTTGGC-(BRIDGE)-CGCAGCCAGCGGTTGAGCT                       |
| 645. ethA_C_7_2      | 4326783 | 4326643 CCGCGGTGATGGCCATGGTCTC-(BRIDGE)-TCGTACCCCTGGTAGCTGGC                  |
| 646. ethA_C_8_2      | 4326643 | 4326503 GGGCCGAAGTCTTTCGACG-(BRIDGE)-CGGTCCGGGTGAACCGTTCAA                    |
| 647. ethA_C_8_2a     | 4326643 | 4326503 GGGCCGACGTGCTTTCGACG-(BRIDGE)-CGGTCCGGGTGAACCGTTCAA                   |
| 648. ethA_C_9_2      | 4326503 | 4326363 CGCGACCTGAGTTCAGCCGGATTC-(BRIDGE)-CTTGATGGCCATCGTCTGGTATGT            |
| 649. ethA_C_10_2     | 4326363 | 4326223 GGGATCCGCGAAAGCATATGCC-(BRIDGE)-ACGGTGTCAAACCGTTGCTGCC                |
| 650. ethA_C_11_2     | 4326223 | 4326083 AGCCCGTCCGCTCAGCAGACC-(BRIDGE)-CACGTAGGTAGTTCTGATTACAGGCGCC           |
| 651. ethA_C_12_2     | 4326083 | 4325943 GCGCCGGATGAGCCGGATGT-(BRIDGE)-CGACGACGGCATCATGCTGCTC                  |
| 652. ethA_C_13_2     | 4325943 | 4325803 CGGGCGATATCGCTACAGCGA-(BRIDGE)-GCGTCCGCGGCATCGACAT                    |
| 653. gidB_W_1_1      | 4408437 | 4408297 TCCGACCGACCCGACGATAA-(BRIDGE)-TCGAACGGAAGATCGTCCACGATGC               |

| # Probe name     | Start   | End Sequence                                                            |
|------------------|---------|-------------------------------------------------------------------------|
| 654. gidB_W_2_1  | 4408297 | 4408157 CTGCGATCTTCGGACCGCGG-(BRIDGE)-GCGATGCGTGGCCGAGCGGC              |
| 655. gidB_W_2_1a | 4408297 | 4408157 CTGCGATCTTCGGACCGCGG-(BRIDGE)-GCGATGCGTGGCCGAGCGGC              |
| 656. gidB_W_3_1  | 4408157 | 4408017 CGGTGAGCTCCTCGAACGCGG-(BRIDGE)-CTTGGCCTTGTCTGGCGGTAC            |
| 657. gidB_W_3_1a | 4408157 | 4408017 CGGTGAGCTCCTCGAACGCGG-(BRIDGE)-CGTGGCCTTGTCTGGCGGTAC            |
| 658. gidB_W_4_1  | 4408017 | 4407877 AGTCTCTCGAGAGATGGTGACAGATCTGG-(BRIDGE)-TGACCGGGTCTGGATATCGGTAGC |
| 659. gidB_W_4_1a | 4408017 | 4407877 AGTCTCTCGAGAGATGGTGACAGATCTGG-(BRIDGE)-TGACCGGGTCTGGATATCGGTAGC |
| 660. gidB_W_5_1  | 4407877 | 4407737 AGCATGCCCTTGTATACGGCCG-(BRIDGE)-GCGTGGCCGTTGAGATCGTGC           |
| 661. gidB_W_6_1  | 4407737 | 4407597 TTGCGTCCGCCCGACCGT-(BRIDGE)-AACGGGCGAATGCTGCCATC                |
| 662. gidB_W_7_1  | 4407597 | 4407457 GTCGGGCCAGGCTCAACTATCGA-(BRIDGE)-GGTGTTCGCACGACGTGAAAGC         |
| 663. gidB_W_7_1a | 4407597 | 4407457 GTCGGGCCAGGCTCAACTATCGA-(BRIDGE)-GGTGTTCGCACGACGTGAAAGC         |
| 664. gidB_C_1_2  | 4408387 | 4408247 CTCCACGCCTTCGCTTTCGCT-(BRIDGE)-AACATTCTCGCTCTCGAGACGCT          |
| 665. gidB_C_2_2  | 4408247 | 4408107 CGTAGGCTGTGTATGTTTACGTGA-(BRIDGE)-TCCACACCGGGTCCCGCAA           |
| 666. gidB_C_3_2  | 4408107 | 4407967 GGGGTCCACAGCCCGC-(BRIDGE)-ATGGCACGCCGCAACCCG                    |
| 667. gidB_C_4_2  | 4407967 | 4407827 GTCCGGCCGCGTATCGCCA-(BRIDGE)-CTGACCCAGGACTCTCGGC                |
| 668. gidB_C_5_2  | 4407827 | 4407687 TCGCTGCCGCCAATTGGTC-(BRIDGE)-CGTACTTCGCTGAGCCCGC                |
| 669. gidB_C_6_2  | 4407687 | 4407547 GATCATCACACGCGGTGCTCC-(BRIDGE)-CCATCCGTGCCACCTCGG               |
| 670. gidB_C_7_2  | 4407547 | 4407407 TCACGCCGCTCCCTCACTCG-(BRIDGE)-GCGCGCCTCAGGCGTGGT                |
| 671. kasA_W_1_1  | 2517865 | 2518004 CGGTGACGTGTGCGCTACATCCAG-(BRIDGE)-CGTTCTGTCGACACTGGACATCG       |
| 672. kasA_W_2_1  | 2518005 | 2518144 GCCTTCACCGCTAATGGCGGT-(BRIDGE)-AAGCTCAGGAAGAAAACCCGGAGG         |
| 673. kasA_W_3_1  | 2518145 | 2518284 CGAGTTCGTACCAAGTGGGATCTAGC-(BRIDGE)-TTCCACGCGTGTGGTGACCG        |
| 674. kasA_W_4_1  | 2518285 | 2518424 CGCCGGCAGCCCGAGGTTCG-(BRIDGE)-GGTCAAGATCGGCGTCACTCA             |
| 675. kasA_W_5_1  | 2518425 | 2518564 CAGATGATCATGCCAACGGTCC-(BRIDGE)-ATCCAGACCGGTTCCCGTTGT           |
| 676. kasA_W_6_1  | 2518565 | 2518704 GACGTCCGCTGTCGCGCGG-(BRIDGE)-GCGCGGTGATCGGTCTGCA                |
| 677. kasA_W_7_1  | 2518705 | 2518844 TGTGTTCGCGAGGCGGGT-(BRIDGE)-TGTGAAGGACCCATCGAGCGC               |
| 678. kasA_W_8_1  | 2518845 | 2518984 GTGTTCTGCGGTTAGGGCG-(BRIDGE)-CGTGTGCTCATCGAGACGGAGG             |
| 679. kasA_W_9_1  | 2518985 | 2519124 GGTGTGATCAGGCCGCGTGA-(BRIDGE)-ATGACTCGCTCGTGGAGCTGG             |
| 680. kasA_W_10_1 | 2519125 | 2519264 CCGATCCGAGATCGACCTTACG-(BRIDGE)-CGCGCCGAAGTCTGCGCTGG            |
| 681. kasA_W_11_1 | 2519265 | 2519404 CGAGGCCGAGGTGGGGTTC-(BRIDGE)-TCGTCCGCCGCAACCCGCG                |
| 682. kasA_W_12_1 | 2519405 | 2519544 GCGCTCGCAGCCGACGCGA-(BRIDGE)-CCCCGCTTCCGGGGCGAG                 |
| 683. kasA_C_1_2  | 2517915 | 2518054 GCCGTACTTCTCTCGGTCTGCAC-(BRIDGE)-ATCTTCGCGCAACCCCTG             |
| 684. kasA_C_2_2  | 2518055 | 2518194 GGCATCGGGGTTCTCCGACTCA-(BRIDGE)-GGCGAGATCGAGCTCGTGC             |
| 685. kasA_C_3_2  | 2518195 | 2518334 CCCTCCACGTGCTCTCGATGTC-(BRIDGE)-GGCCATGTGGCTGTCGACC             |
| 686. kasA_C_4_2  | 2518335 | 2518474 CGACATCGCTCGCATGTCGAGTC-(BRIDGE)-CTCGGCTCCACCTAGACCGGTG         |
| 687. kasA_C_5_2  | 2518475 | 2518614 TCATCAGGTGCTAGCTTTCGACAATCCT-(BRIDGE)-GGGTATCACCCCGCGCG         |
| 688. kasA_C_6_2  | 2518615 | 2518754 CCGACGAACAGCCGACACC-(BRIDGE)-GCATCATGGAGAACCCCGCA               |
| 689. kasA_C_7_2  | 2518755 | 2518894 GTTCCGGGTCGACATGGCC-(BRIDGE)-CTTGGCCGACGGGCTTTGG                |
| 690. kasA_C_8_2  | 2518895 | 2519034 CCCAGCAATCGGCCAACGG-(BRIDGE)-TGGTCGATGTCGCGCGCA                 |
| 691. kasA_C_9_2  | 2519035 | 2519174 CCGTCCGCTCGCGTTGACG-(BRIDGE)-CGAGCCGACCCGCGCCG                  |
| 692. kasA_C_10_2 | 2519175 | 2519314 TCAGCACCGTGCACCGACT-(BRIDGE)-GTTGTTGACTGCGTAGCGGTAATCGC         |
| 693. kasA_C_11_2 | 2519315 | 2519454 TGGCCGCCGAACCCGAACGA-(BRIDGE)-CTTGGAACGTTCTTCCATATCGGTCC        |
| 694. ndh_W_1_1   | 2103242 | 2103102 GGCCTCGAGCGGTGCGGTTG-(BRIDGE)-ATCTCCCGGGGTCATCACCA              |
| 695. ndh_W_2_1   | 2103102 | 2102962 GGATCTGGTTCCGGCGGCT-(BRIDGE)-ACTACCGTAGTAGTAACTGAACTCGCTCA      |
| 696. ndh_W_3_1   | 2102962 | 2102822 AATCGCTCCGCCGACCCGGG-(BRIDGE)-AAACGCGCAAGAAAGCTCAAGCG           |
| 697. ndh_W_4_1   | 2102822 | 2102682 GCCTGATCGTCCGCGGGT-(BRIDGE)-TCGTGCTGCGTAAGCAGCGC                |
| 698. ndh_W_5_1   | 2102682 | 2102542 TCCAGCGATCCGGAACGGCG-(BRIDGE)-GCTGGCAGTCTTATTCGGCAACG           |
| 699. ndh_W_6_1   | 2102542 | 2102402 CCAAGGCGGGGATTCTGC-(BRIDGE)-GGCAAGCTACTGACATTACCGTTG            |
| 700. ndh_W_7_1   | 2102402 | 2102262 CCGCAACGGCATCACCTCAAG-(BRIDGE)-TTGACGCCGCCGCGGGT                |
| 701. ndh_W_8_1   | 2102262 | 2102122 GGCCGGTCCAAGTCTGCC-(BRIDGE)-GACTCCGACGGCACCGTCCG                |
| 702. ndh_W_9_1   | 2102122 | 2101982 CAAGCCGAACGTGCCGCGG-(BRIDGE)-CGACCTGTCCATCCCGGTACC              |
| 703. ndh_W_10_1  | 2101982 | 2101842 GGCTGATTTGGCTGTTGCTGCAC-(BRIDGE)-CCAACCCGGCGAGCGTGAG            |
| 704. ndh_W_11_1  | 2101842 | 2101702 CGGCTCGAAACAGCTGCCGA-(BRIDGE)-CTGGCTACTGATCGGGTTCAAGA           |
| 705. ndh_W_12_1  | 2101702 | 2101562 GCACCGTGCCTGATGGCGT-(BRIDGE)-GCTGGCCGCGAGGCGCAGG                |
| 706. ndh_C_1_2   | 2103192 | 2103052 GCCCCGGTGGCTACACACC-(BRIDGE)-TCCTGACGGGGTCACTCGATGA             |
| 707. ndh_C_2_2   | 2103052 | 2102912 GCTGGGGACTCATGTTCCGCTGC-(BRIDGE)-CGATCAGCTTGTGTAACGTCGGC        |
| 708. ndh_C_3_2   | 2102912 | 2102772 CAGGTGATGGTGGTGGCGG-(BRIDGE)-GGTACGTTGCCAACAGTACTG              |
| 709. ndh_C_4_2   | 2102772 | 2102632 TGCCCGCCAGGTGATGTG-(BRIDGE)-CCGGGTGCGAATTCGGCGAA                |
| 710. ndh_C_5_2   | 2102632 | 2102492 CAACGCTGCTGATGGACTTATG-(BRIDGE)-CAACACCGGTGGGCCAGCC             |
| 711. ndh_C_6_2   | 2102492 | 2102352 TCGCGGATCTGTCGGCCATT-(BRIDGE)-CTGACAGCTTTGCGCCAT                |
| 712. ndh_C_7_2   | 2102352 | 2102212 TGCAACCGGCGAGCCCGG-(BRIDGE)-GACCAGACCTTGAGGCGGACT               |
| 713. ndh_C_8_2   | 2102212 | 2102072 GACTGGCCGAAACCCGGCC-(BRIDGE)-CCATATCGCCACACGAAACAG              |
| 714. ndh_C_9_2   | 2102072 | 2101932 CGGCACACCTCCACAGCGG-(BRIDGE)-CATGATCCCTTGTGGAAGTACTGGAATGG      |
| 715. ndh_C_10_2  | 2101932 | 2101792 GCGAAAACCTCGAAACGTGGC-(BRIDGE)-CACGACGAGAGTGGTATCTGGT           |
| 716. ndh_C_11_2  | 2101792 | 2101652 GCGGAGTACTGAGGAAAGTACCGTC-(BRIDGE)-AGCTGGCACTTAGCGCTTGC         |
| 717. ndh_C_12_2  | 2101652 | 2101512 ACCGGTTGCTGGCTAACGCT-(BRIDGE)-GCCGCGCCACTATCAGCG                |
| 718. pncA_W_1_1  | 2289441 | 2289301 TCGCGGCTCATGGACCTATATC-(BRIDGE)-CACCAAGGCCGATGACACC             |
| 719. pncA_W_2_1  | 2289301 | 2289161 GTAACCGGTGGCGCCGCT-(BRIDGE)-TGTGGCTCCGCGTGGTAG                  |

| # Probe name     | Start   | End Sequence                                                          |
|------------------|---------|-----------------------------------------------------------------------|
| 720. pncA_W_2_1a | 2289301 | 2289161 GGAACCGTGGCCGCGCT-(BRIDGE)-TGTGGCTGCCGCTCGGTAG                |
| 721. pncA_W_3_1  | 2289161 | 2289021 GTGGCCACCGCATTGCGTCA-(BRIDGE)-GGCCCGCCATCAGCGACT              |
| 722. pncA_W_3_1b | 2289161 | 2289021 GGGGCCACCGCATTGCGTCA-(BRIDGE)-GGCCCGCCATCAGCGACT              |
| 723. pncA_W_3_1d | 2289161 | 2289021 GTGGCCACCGCATTGCGTCA-(BRIDGE)-GGCCCGCCATCAGCGACT              |
| 724. pncA_W_4_1  | 2289021 | 2288881 GCACGCCACTGCTGAATTGGCTG-(BRIDGE)-GCGGTACTCCCGCGCGGAC          |
| 725. pncA_W_4_1a | 2289021 | 2288881 GCACGCCACTGCTGAATTGGCTG-(BRIDGE)-GCGGTACTCCCGCGCGGAC          |
| 726. pncA_W_4_1b | 2289021 | 2288881 GCACGCCACTGCTGAATTGGCTG-(BRIDGE)-GCGGTACTCCCGCGCGGAC          |
| 727. pncA_W_4_1c | 2289021 | 2288881 GCGGATAGTACGCGCGGATAC-(BRIDGE)-CGGCAACGCGCGCTCGATGA           |
| 728. pncA_W_5_1  | 2288881 | 2288741 GCGGGTGTGTCGCGCGATAC-(BRIDGE)-CGGCAACGCGCGCTCGATGA            |
| 729. pncA_W_5_1a | 2288881 | 2288741 GCGGGTGTGTCGCGCGATAC-(BRIDGE)-CGGCAACGCGCGCTCGATGA            |
| 730. pncA_W_5_1c | 2288881 | 2288741 GCGGGTGTGTCGCGCGATAC-(BRIDGE)-CGGCAACGCGCGCTCGATGA            |
| 731. pncA_W_6_1  | 2288741 | 2288601 GCCGCGCAGCACCAGCGCGG-(BRIDGE)-CACCGTCGCGCGCTGGAGG             |
| 732. pncA_W_6_1b | 2288741 | 2288601 GCCGCGCAGCACCAGCGCGG-(BRIDGE)-CACCGTCGCGCGCTGGAGG             |
| 733. pncA_C_1_2  | 2289391 | 2289251 CGGGATAGTACGCGCGGTGATGT-(BRIDGE)-TACGTTCCGGCGACTGCCCG         |
| 734. pncA_C_1_2a | 2289391 | 2289251 CGGGATAGTACGCGCGGTGATGT-(BRIDGE)-TACGTTCCGGCGACTGCCCG         |
| 735. pncA_C_2_2  | 2289251 | 2289111 ACGCCCGCATACGTCCACCA-(BRIDGE)-CGTATGGTAGTCCGCGCTTCG           |
| 736. pncA_C_2_2a | 2289251 | 2289111 ACGCCCGCATACGTCCACCA-(BRIDGE)-CGTATGGTAGTCCGCGCTTCG           |
| 737. pncA_C_3_2  | 2289111 | 2288971 TGTGGAAGTCTTGGTTGCCACGA-(BRIDGE)-GATTGCCGACGTCCAGACTGGG       |
| 738. pncA_C_3_2a | 2289111 | 2288971 TGTGGAAGTCTTGGTTGCCACGA-(BRIDGE)-GATTGCCGACGTCCAGACTGGG       |
| 739. pncA_C_3_2d | 2289111 | 2288971 TGTGGAAGTCTTGGTTGCCACGA-(BRIDGE)-GATTGCCGACGTCCAGACTGGG       |
| 740. pncA_C_4_2  | 2288971 | 2288831 GGCACCTTGTAGAACACCGCCTC-(BRIDGE)-TGATCGGTGGCAATACCGACCACA     |
| 741. pncA_C_4_2b | 2288971 | 2288831 GGCACCTTGTAGAACACCGCCTC-(BRIDGE)-TGATCGGTGGCAATACCGACCACA     |
| 742. pncA_C_4_2c | 2288971 | 2288831 GGCACCTTGTAGAACACCGCCTC-(BRIDGE)-TGATCGGTGGCAATACCGACCACA     |
| 743. pncA_C_4_2h | 2288971 | 2288831 GGCACCTTGTAGAACACCGCCTC-(BRIDGE)-TGATCGGTGGCAATACCGACCACA     |
| 744. pncA_C_5_2  | 2288831 | 2288691 CGGCCGCTGGCGCACATAA-(BRIDGE)-AAACCAACTCGACGTGGCGG             |
| 745. pncA_C_5_2d | 2288831 | 2288691 CGGCCGCTGGCGCACATAA-(BRIDGE)-AAACCAACTCGACGTGGCGG             |
| 746. pncA_C_5_2e | 2288831 | 2288691 CGGCCGCTGGCGCACATAA-(BRIDGE)-AAACCAACTCGACGTGGCGG             |
| 747. pncA_C_6_2  | 2288691 | 2288551 GCGGTGCCATCAGGAGCTGC-(BRIDGE)-AACCCACGGGTCTTCGACCC            |
| 748. rpsL_W_1_1  | 781323  | 781462 GATGCTCGGATGAGACGAATCGAGT-(BRIDGE)-GGCCGCAACGCCCGCTTGA         |
| 749. rpsL_W_2_1  | 781463  | 781602 CCGCAAGGTCGTCGGGACA-(BRIDGE)-TTGAGGCAAGCTATGCGACACCCC          |
| 750. rpsL_W_3_1  | 781603  | 781742 CGCGTGAAGTTGACGAGTCAGGTC-(BRIDGE)-AGATCAGTAAGGTCAAGACCGCGGC    |
| 751. rpsL_W_4_1  | 781743  | 781882 TCGTGGATACGAGGGGTGCAA-(BRIDGE)-GAGGTACGCGGTACATTCGCCG          |
| 752. rpsL_W_5_1  | 781883  | 782022 TGGTACCCAGTTGGTGAACAAGGT-(BRIDGE)-GAACCGCAACACGCGACGCGC        |
| 753. rpsL_C_1_2  | 781373  | 781512 GTAAGCCGCGCAGCAGAGC-(BRIDGE)-TGCCCCGCCACGGTTACCCG              |
| 754. rpsL_C_2_2  | 781513  | 781652 GCTTTCAGTCTTGTGTCGGCCA-(BRIDGE)-ACGACGCTGCGGGCTGCCCT           |
| 755. rpsL_C_3_2  | 781653  | 781792 GTGTACACGCGGGTGCATACACC-(BRIDGE)-GAGTCTCTGCAAGTTGTGGC          |
| 756. rpsL_C_4_2  | 781793  | 781932 CGCCGCGCACCAGCACCATC-(BRIDGE)-AGCCCTTCTCTTCTTAGCCCGCT          |
| 757. rpsL_C_4_2a | 781793  | 781932 CGCCGCGCACCAGCACCATC-(BRIDGE)-AGCCCTTCTCTTCTTAGCCCGCT          |
| 758. rpsL_C_5_2  | 781933  | 782072 CGGGCCCCCTGCGTGGCATC-(BRIDGE)-GCGCACATAAACAATGCGCTCG           |
| 759. thyA_W_1_1  | 3074661 | 3074521 GTTTGGCGGCGAGTCGCTGC-(BRIDGE)-GCGCGGTGTGCGGTGTTTT             |
| 760. thyA_W_2_1  | 3074521 | 3074381 CCGGAACCCGAGCCTGTT-(BRIDGE)-GGCGCTCCGCCGCTTGC                 |
| 761. thyA_W_3_1  | 3074381 | 3074241 TGGCTGCAGCAGCAGGAGT-(BRIDGE)-GGCCAGCAGATGCGCTATGATTTGT        |
| 762. thyA_W_4_1  | 3074241 | 3074101 TTTGCTGCGCAGCAGTCCCG-(BRIDGE)-CACCATCTGGGACGAATGGGCAAGT       |
| 763. thyA_W_5_1  | 3074101 | 3073961 ACCAACGCGCAGCAGCAGT-(BRIDGE)-ATTCCCGCGCATCATCGTGTG            |
| 764. thyA_W_6_1  | 3073961 | 3073821 TCTACGACAATCAGTCGAGCAAGTACG-(BRIDGE)-TTTCTGGGTGTCGGTTCAACATCG |
| 765. thyA_W_7_1  | 3073821 | 3073681 GCGATCAAAGCTCCAGTCGCGTAT-(BRIDGE)-GCTGCAAGCTCAGCCGCGAGC       |
| 766. thyA_W_8_1  | 3073681 | 3073541 GCGCGCGACATCCCTGGCG-(BRIDGE)-GAGGCGCGCCGACGACAATG             |
| 767. thyA_C_1_2  | 3074611 | 3074471 GTCGACGGGAATACACCCAGATCCG-(BRIDGE)-GATTGACACGCGGTGACGCTAGC    |
| 768. thyA_C_2_2  | 3074471 | 3074331 AGCAGGTCCTCGTATGGCTCAC-(BRIDGE)-GTAGTGAGCAGCGGAAACCGGC        |
| 769. thyA_C_3_2  | 3074331 | 3074191 TCGTAGGCTACCGATTGAAATGGACTTTCTG-(BRIDGE)-AGATCGGCCGAGTTGCGCT  |
| 770. thyA_C_4_2  | 3074191 | 3074051 GCCACGATCGCATTGTACACCGT-(BRIDGE)-CCGCTCGATTCGCCGACGT          |
| 771. thyA_C_5_2  | 3074051 | 3073911 TGACAGGGCGCAGCGCCAT-(BRIDGE)-ATGTGGGTGAGCAACGCATAGCTGG        |
| 772. thyA_C_6_2  | 3073911 | 3073771 AGCCGCGCTGGCGCGCCATC-(BRIDGE)-CGGCTAGAAGTAGTTTCGGATATGGCCG    |
| 773. thyA_C_7_2  | 3073771 | 3073631 TCATAGGTGTAATCGAAGATTGAATCCCGGT-(BRIDGE)-TTCCGGCTGAAGGCTGCCGA |
| 774. thyA_C_8_2  | 3073631 | 3073491 TCGTCACACGCGTCACTCTTGA-(BRIDGE)-TCGTGTGCCCATGGTATCTCC         |
| 775. tlyA_W_1_1  | 1917740 | 1917879 CGAAGGCATCGCAGCTGCTTT-(BRIDGE)-CTAGCGTAGGAACGCAATGACCATCGA    |
| 776. tlyA_W_2_1  | 1917880 | 1918019 CGTCAACAGGCCGCGAGTTGAT-(BRIDGE)-CCGAGGCGCAGAGGTGTTG           |
| 777. tlyA_W_3_1  | 1918020 | 1918159 GCGCACAAATAGTCGGTGCGC-(BRIDGE)-CGGCGCGGCAAGGTGCGCA            |
| 778. tlyA_W_4_1  | 1918160 | 1918299 GATACGCGCAGCTGGCGTGG-(BRIDGE)-TGGAGGCGTTCGCGATCGCG            |
| 779. tlyA_W_5_1  | 1918300 | 1918439 GTACCGTGTGCGCGCGCT-(BRIDGE)-TCGCTGCGCAACGATCCTCG              |
| 780. tlyA_W_6_1  | 1918440 | 1918579 GGTGCTCGCGGTGCGCGCGC-(BRIDGE)-GGTTGGATGCGCTTCGCGCG            |
| 781. tlyA_W_7_1  | 1918580 | 1918719 GCCAAGGATTGGAGGATGCGGTG-(BRIDGE)-GGCAGAGACTGGGCTGG            |
| 782. tlyA_W_8_1  | 1918720 | 1918859 GCGACAATAAATGCTGCTTCCGCGT-(BRIDGE)-CACCTGCGATTAGCGAGGGC       |
| 783. tlyA_C_1_2  | 1917790 | 1917929 AGCGAAGCAAGTAGGCGTCA-(BRIDGE)-ACCTTCTCCGCGACTCCAGG            |
| 784. tlyA_C_2_2  | 1917930 | 1918069 GTCTGTCCAGCCGCACTCA-(BRIDGE)-TGGCCGGCTTGACCGCGGC              |
| 785. tlyA_C_3_2  | 1918070 | 1918209 GGTGGTGTGCGACACGCGCG-(BRIDGE)-GCCCGCTCCAGACAGCGCC             |



| # Probe name               | Start   | End Sequence                                                         |
|----------------------------|---------|----------------------------------------------------------------------|
| 786. tlyA_C_4_2            | 1918210 | 1918349 GGTGAACCCACCGGTGCGATGC-(BRIDGE)-CGTGCGTTGGTCCGCTCGAG         |
| 787. tlyA_C_5_2            | 1918350 | 1918489 TCGCCTCCGGTGTGAGGCCA-(BRIDGE)-GCGGCTTACCAGTGGAAAGCATATCG     |
| 788. tlyA_C_6_2            | 1918490 | 1918629 GACCTGACCTTTCCCACTCAAAC-(BRIDGE)-CAGCGGGTGGCTTGACGC          |
| 789. tlyA_C_7_2            | 1918630 | 1918769 ACATTGCCCCGATGGGCCCGG-(BRIDGE)-CAGAACACTGCGATGAGCGGTAC       |
| 790. tlyA_C_8_2            | 1918770 | 1918909 CGCCCGGTGTGGACGACCAG-(BRIDGE)-TCGTGGGAGCCAGATGCAACG          |
| 791. embA-embB_C_12_R      | 4244618 | 4244757 CCACCACGGTGTATCAGCGAAC-(BRIDGE)-TCTCCAGGTAAGGAAGTAGTAGCGCA   |
| 792. embA-embB_C_14_R      | 4244898 | 4245037 AGCAGCAGGCCAGCCCGCT-(BRIDGE)-TTGCGTGCAGTATGTAGACCGATGCG      |
| 793. embA-embB_C_24_R      | 4246298 | 4246437 GACCCCGGTGAGCTGGAC-(BRIDGE)-CCTGATCGGCCGACCAGC               |
| 794. embA-embB_C_30_R      | 4247138 | 4247277 GTCGGCCGGGTGGAGAACCG-(BRIDGE)-GGCCTGAGGAGGAGCTGGCC           |
| 795. embA-embB_C_41_R      | 4248678 | 4248817 TCGCACGATCCCGCCACCA-(BRIDGE)-GTCCAGCGGCTTCATGAAACCCG         |
| 796. embA-embB_C_4_R       | 4243498 | 4243637 GGCCGCGAGTGTGGACAGCA-(BRIDGE)-GCCTCCGCTGCGATCTGTGG           |
| 797. embA-embB_C_9_R       | 4244198 | 4244337 TGCGGGGACGGCGATCCAG-(BRIDGE)-GGAACACCGCACCAGCGGTG            |
| 798. embA-embB_W_19_R      | 4245548 | 4245687 CGCCGAGGGAAGGGCCCGG-(BRIDGE)-CAAACCGAGGGCGTGGCGG             |
| 799. embA-embB_W_3_R       | 4243308 | 4243447 GCGCCACGGCGCTGACAT-(BRIDGE)-CTGCTGTGCGGCATCGTTCCG            |
| 800. embA-embB_W_42_R      | 4248768 | 4248907 GCGTACCAGAACACACGGTG-(BRIDGE)-ACGTACTCGTGCAGCTGATACCAATG     |
| 801. embA-embB_W_7_R       | 4243868 | 4244007 CGGTGACGAGCGGTGATCG-(BRIDGE)-GGCGGTCTGTTAGCCATGTT            |
| 802. embC_C_19_R           | 4242238 | 4242377 CCGGGTCCGGGTGACGTCG-(BRIDGE)-GCCGGGCGGGGAGCCGTTG             |
| 803. embC_C_20_R           | 4242378 | 4242517 CCGGGTCCAGGTTGTAGGGCA-(BRIDGE)-CACCACGACGCGGCC               |
| 804. embC_C_21_Ra          | 4242518 | 4242657 TCGAATCGCCCGCCCGCT-(BRIDGE)-GGTGCAGCAGGTTACGCCA              |
| 805. embC_C_21_R           | 4242518 | 4242657 TCGAATCGCCCGCCCGCT-(BRIDGE)-GGTGCAGCAGGTTGCGCCA              |
| 806. embC_C_5_R            | 4240278 | 4240417 ACTCAGCGGGGCGGTGACCA-(BRIDGE)-GCGCAGCGGTGACCGGGGT            |
| 807. embC_C_6_R            | 4240418 | 4240557 TCGTAGCCGCTGCGCTACC-(BRIDGE)-GCCATCTTACGCGCGTGGG             |
| 808. embC_C_7_R            | 4240558 | 4240697 CGTACCAGGATCATGGCG-(BRIDGE)-CGATAACGAGGTTCCAGACCCG           |
| 809. embC_W_20_R           | 4242328 | 4242467 CATGCTCGGTGCGGGTGTG-(BRIDGE)-CGAAGGGGGCACCACGGCCG            |
| 810. embC_W_21_R           | 4242468 | 4242607 CGGACACCAGGTTGGTCTGATG-(BRIDGE)-ACCGGCTGCCACCAACGAG          |
| 811. embC_W_6_R            | 4240368 | 4240507 GCCACCGGCTGAGCTTCTCG-(BRIDGE)-TCGGACTGGTGCAGGGACCC           |
| 812. embC_W_8_R            | 4240648 | 4240787 GGTGTCCGAGCATGCGGGCT-(BRIDGE)-CCTGCCCGCGCTGGTGGT             |
| 813. gyrB-gyrA_C_14_R      | 6868    | 7007 GCATGAACCGGAACAACAGTCAACAAC-(BRIDGE)-GACCTGCGCGTCCGGTTCG        |
| 814. gyrB-gyrA_C_20_R      | 7708    | 7847 CCCTCAGCATCTCCATCGCCAACG-(BRIDGE)-CGCGATGCCCTGACCCCGT           |
| 815. gyrB-gyrA_C_21_R      | 7848    | 7987 CGGGATATTGGTTGCCATGCCGAC-(BRIDGE)-GGGAAGTCCGGCCTTTAACCCG        |
| 816. gyrB-gyrA_C_31_R      | 9248    | 9387 TGTGCGCAGGTTGACCGCC-(BRIDGE)-CACGACCATTGGCCGCGAGC               |
| 817. gyrB-gyrA_C_33_R      | 9528    | 9667 CCTTTACCCCCGCGCCCTG-(BRIDGE)-CGTGCCCGGTGCGGATCAC                |
| 818. gyrB-gyrA_C_4_R       | 5468    | 5607 CCGCGGCGCTGCTGCGGAC-(BRIDGE)-ACGCGTGACAGACCACAGA                |
| 819. gyrB-gyrA_W_33_R      | 9478    | 9617 GCGTTGATTGTCGACGACGACAGC-(BRIDGE)-CGAGCTAGGGGGCTATGCGA          |
| 820. gyrB-gyrA_W_34_R      | 9618    | 9757 TTGGCCATCGCGCAACGC-(BRIDGE)-GAGCTGTATGCCGCTACTTCCGGC            |
| 821. gyrB-gyrA_W_4_R       | 5418    | 5557 GGTGATGACAACTCATGCCGGC-(BRIDGE)-GTTATGCAACCACAGTGAACGTAGTGCTG   |
| 822. iniB-iniA-iniC_C_11_R | 410637  | 410776 TGCGGTTGGGTAACCCCGG-(BRIDGE)-CCGTACGACGCGAGTTCGATGGG          |
| 823. iniB-iniA-iniC_C_15_R | 411197  | 411336 GGGGCCGCGGCGGACACA-(BRIDGE)-GCAGCGGGCTGGCGCGCCG               |
| 824. iniB-iniA-iniC_C_19_R | 411757  | 411896 CGAACGTATTTCCGCGAGTACCCAG-(BRIDGE)-CTGTGGGCTTCCCGTTTGGC       |
| 825. iniB-iniA-iniC_C_29_R | 413157  | 413296 ACAATGGTGGCGTGCATGAGTTCTC-(BRIDGE)-GGTGCACACAGGAACACCACC      |
| 826. iniB-iniA-iniC_C_4_R  | 409657  | 409796 GCTAGCCAGGCCGACCGA-(BRIDGE)-CTCAATCACGGCAGTAAACCCAGACCCG      |
| 827. iniB-iniA-iniC_C_5_R  | 409797  | 409936 ACCTGAGCGCCGACTCCGGC-(BRIDGE)-CCGGCCGCTCCACCCGAT              |
| 828. iniB-iniA-iniC_C_6_R  | 409937  | 410076 CGAGCGCGCACGATAGCC-(BRIDGE)-CGGCTGAGACACCGATCTGGCT            |
| 829. iniB-iniA-iniC_W_11_R | 410587  | 410726 CGGTGTTGACGCTCGTACGAG-(BRIDGE)-CGAAGTTCCGGCGCGGGCC            |
| 830. iniB-iniA-iniC_W_16_R | 411287  | 411426 GCTGGGGTGTACCCGAGG-(BRIDGE)-CGGTGGCCGCGAGGTTTGC               |
| 831. iniB-iniA-iniC_W_20_R | 411847  | 411986 GGACACGACCTACGAACCCGC-(BRIDGE)-GTGACCGACTGCTTCGGATTTGGAG      |
| 832. iniB-iniA-iniC_W_5_R  | 409747  | 409886 GCTTTGGCGCGGGTGGC-(BRIDGE)-AGGTGCGCTTGCTGCCAG                 |
| 833. iniB-iniA-iniC_W_6_R  | 409887  | 410026 GTTGGCGTGGTGTGCGCGC-(BRIDGE)-CTGGGTCTGGGTGTTAGGCC             |
| 834. kasA_C_2_R            | 2518080 | 2518219 AAGCCTCGCTGAACGTTGGC-(BRIDGE)-ACCCTTCCAGTGCTCTCGATGTC        |
| 835. kasA_C_3_R            | 2518220 | 2518359 CCGTCTCGCCGCCAACAG-(BRIDGE)-TACGACATGCGTGCATGTGCGAGT         |
| 836. kasA_C_5_R            | 2518500 | 2518639 CCGGGGGCCGCCGATTCA-(BRIDGE)-CGAGCCGACGAAACAGGCCG             |
| 837. kasA_W_4_R            | 2518310 | 2518449 CAGACCGGTTCCCGTGTGTTG-(BRIDGE)-GATCCGGTGCAGCCACATGGG         |
| 838. kasA_W_6_R            | 2518590 | 2518729 CGAAGGACCCATCGAGGCGCTG-(BRIDGE)-GGGCGCGCCGGGGTGTAG           |
| 839. katG_C_7_Ra           | 2155257 | 2155396 CGCCCGGCCATGGGGTCCG-(BRIDGE)-GCCACGAGATCGCCGGGT              |
| 840. katG_C_7_R            | 2155257 | 2155396 CGCCCGGCCATGGGGTCCG-(BRIDGE)-GCCACGAGATCGCCGGGC              |
| 841. katG_W_4_R            | 2155727 | 2155866 CGGGGGCGGATGACGCGGT-(BRIDGE)-AGTGATGACCACCTCGACGCCG          |
| 842. katG_W_8_R            | 2155167 | 2155306 CCGGTAAGGACGCGATCACCAGC-(BRIDGE)-GTCACACTTTCGGTAAGACCCATGGCG |
| 843. mabA_inhA_C_12_R      | 1674715 | 1674854 TCGCGCGCCACGAACTGTT-(BRIDGE)-AGCAGCTGGATCTGGGGCC             |
| 844. mabA_inhA_C_13_R      | 1674855 | 1674994 CGTGATCCAGCCCTCTCG-(BRIDGE)-GCGCGCGCGCTGCGGCTAG              |
| 845. mabA_inhA_C_3_R       | 1673455 | 1673594 ATGGGGGTTTGGCCCTTCACT-(BRIDGE)-GGCGCTCGGATCCACGGTG           |
| 846. mabA_inhA_W_13_R      | 1674805 | 1674944 GTGTGCGCGTGTGCTGA-(BRIDGE)-ATCGTGGCGGTGCGCTCGG               |
| 847. mabA_inhA_W_14_R      | 1674945 | 1675084 CCCGACGAGTGGCGCGTT-(BRIDGE)-CTGGCTCCGCGCACCCG                |
| 848. mabA_inhA_W_4_R       | 1673545 | 1673684 GTAGAAAGAGCACAGGTCGGT-(BRIDGE)-GCTGCCGACGGCCAAAGGT           |
| 849. oxyR-ahpC_C_10_R      | 2725466 | 2725605 CGCCCTGATCAGCTTGCCG-(BRIDGE)-TGGCACGGTCATTGCCCCAGG           |
| 850. oxyR-ahpC_C_2_R       | 2726586 | 2726725 ACGAGCTGTGCGCATGCAACTG-(BRIDGE)-GACCGGTGACCTTTATCGTCGACC     |
| 851. oxyR-ahpC_C_8_Ra      | 2725746 | 2725885 CTATGCAGTCAACAAGTCACTCTG-(BRIDGE)-TGCGGAATCAGTGTCCCCCA       |

| # Probe name         | Start   | End Sequence                                                               |
|----------------------|---------|----------------------------------------------------------------------------|
| 852. oxyR-ahpC_C_8_R | 2725746 | 2725885 CTCATGCAGTCACAACAAAGTCAGCTCTG-(BRIDGE)-TGCGGAATCAGTGTACCCCCA       |
| 853. oxyR-ahpC_W_3_R | 2726496 | 2726635 GCATCGGGAAAGGGTAACGTTTTGAGGTC-(BRIDGE)-GAGACGAACTGGATCTCGTTGTTGGGG |
| 854. oxyR-ahpC_W_9_R | 2725656 | 2725795 GCGCGACGAATCGGTTTGGTGTGTT-(BRIDGE)-ACCGTCGTGCAGTGCCTGAC            |
| 855. pncA_C_1_R      | 2289227 | 2289366 GAGCGGGCCACCCAACCCG-(BRIDGE)-GATCAACGCCGCATACGTCCAC                |
| 856. pncA_C_5_R      | 2288667 | 2288806 GGCCAAGCATTGCGTACCGC-(BRIDGE)-GTTCCGGCGGTGCCATCAGGAG               |
| 857. pncA_W_2_R      | 2289137 | 2289276 CGCGCCATCAGCGACTACCTG-(BRIDGE)-CTGCCGGGCGAGTCGCCGA                 |
| 858. pncA_W_6_R      | 2288577 | 2288716 GGGTCGGGTTGTTACCGGTGAC-(BRIDGE)-CGCACCCGACGCTCGAGTT                |
| 859. rpoB_C_14_R     | 761532  | 761671 GACACCATCTGGCGGGGCGA-(BRIDGE)-GTGCCACCAGCGGGGCCTC                   |
| 860. rpoB_C_26_R     | 763212  | 763351 CGCAGTTCGATCGCCGACC-(BRIDGE)-ACGGGTTTAGTAATTTGCGACAGCTTACG          |
| 861. rpoB_C_9_R      | 760832  | 760971 TCATCGTGGTCTGACCCTCGTG-(BRIDGE)-GCGACATGCCACCCGGATC                 |
| 862. rpoB_W_10_R     | 760922  | 761061 CAACATCCGGCCGGTGGTCG-(BRIDGE)-GCGTACGGTCGGCGAGCTGA                  |
| 863. rpoB_W_15_R     | 761622  | 761761 CGAGGAGGTGTCCGGCCGACTACAT-(BRIDGE)-CAGCGCCAGCGGTGCCGCT              |
| 864. rpoB_W_17_R     | 761902  | 762041 AGGACGTGCTCACCTCGATCCAC-(BRIDGE)-GTCCCTGTACTGACGACGGCGA             |
| 865. rrs-rrl_C_13_R  | 1473442 | 1473581 ACCCGGCTCTCGCCCACTAC-(BRIDGE)-CCACTATCCAGTTCTCAAACACCAACCC         |
| 866. rrs-rrl_C_23_R  | 1474842 | 1474981 GGGTGGCTGCTTAAGCCAACCTC-(BRIDGE)-CCCTACCACACCCACCAAGG              |
| 867. rrs-rrl_C_30_R  | 1475822 | 1475961 AACTTACCCGACAAAGAAATTCGCTACCT-(BRIDGE)-GGGGTCTTTTCGCTCGCCG         |
| 868. rrs-rrl_W_10_R  | 1472947 | 1473086 CGTGTCCGAACATGAGACAAGGGT-(BRIDGE)-GTACCGGCCATTGTAGCATGTGTGAAG      |
| 869. rrs-rrl_W_11_R  | 1473087 | 1473226 TCGCGCATCGACGCCCTT-(BRIDGE)-GCCGGGAACGTATCCACGC                    |
| 870. rrs-rrl_W_12_R  | 1473227 | 1473366 CGTGACGGCGGTGTGTACAAG-(BRIDGE)-AGCCGCACCTCCGGTACGG                 |
| 871. rrs-rrl_W_15_R  | 1473647 | 1473786 GCGCCCTTAGACACTTACAACACAACAAAA-(BRIDGE)-GGTTCCCAATTCGAAATCCTCGGA   |
| 872. rrs-rrl_W_16_R  | 1473787 | 1473926 GGGTAGCAGACATCACTCGTGCTG-(BRIDGE)-CCTGTTCCGCTTCGCTCCG              |
| 873. rrs-rrl_W_17_R  | 1473927 | 1474066 CGGTTACCATGCGTCCGCTTAG-(BRIDGE)-CGTCTACGGCAGACCATCCAGG             |
| 874. rrs-rrl_W_18_R  | 1474067 | 1474206 GTTTTCGCTACCGGCTCTCAC-(BRIDGE)-TACTAATCCGCTATCGGTATCGAGGAGT        |
| 875. rrs-rrl_W_19_R  | 1474207 | 1474346 GGGGTACTTTTACCATTCCCTCACGG-(BRIDGE)-CTCGCAGGCTCATTCTCAAAGGCA       |
| 876. rrs-rrl_W_20_R  | 1474347 | 1474486 GGGTTAACCTGCGACATGTCCCTGA-(BRIDGE)-CTGGCCATGGGTAGATCACTCCGC        |
| 877. rrs-rrl_W_21_R  | 1474487 | 1474626 CGGTCTTACCCGCGCTTACC-(BRIDGE)-AACCGTGCACCTAAATGCATTTCCGG           |
| 878. rrs-rrl_W_22_R  | 1474627 | 1474766 ACCTCCGCGGTGAACCACGC-(BRIDGE)-TTCCCTTCGACGTACGGAGCTTATCC           |
| 879. rrs-rrl_W_24_R  | 1474907 | 1475046 TGAGCCCGCTACATTATCGCGC-(BRIDGE)-TGCATTCTCACTCCCCACCTCC             |
| 880. rrs-rrl_W_25_R  | 1475047 | 1475186 CACTTGCTTGTGCTACTCATGCC-(BRIDGE)-GAATATCAACCCGTTGTCATCGACTACGC     |
| 881. rrs-rrl_W_26_R  | 1475187 | 1475326 GCGCCACACACGGGTACGG-(BRIDGE)-TGCGTACCCCTTCGCTTACT                  |
| 882. rrs-rrl_W_27_R  | 1475327 | 1475466 CCACTGACTGGTACGGCTACCTTC-(BRIDGE)-TTTTCTGGCAGCAGAGGATACCCGA        |
| 883. rrs-rrl_W_28_R  | 1475467 | 1475606 CGTGTGTGCTCGTAGAGGC-(BRIDGE)-ATTCCGGTCCCTTCTCCCGA                  |
| 884. rrs-rrl_W_29_R  | 1475607 | 1475746 CCCAGCAAGGGTGTTCAGAT-(BRIDGE)-CTAACCTTCAGCACCAGGGCAGG              |
| 885. rrs-rrl_W_2_R   | 1471827 | 1471966 CCAAACAAAACCCAAACACTCCCTTTGGA-(BRIDGE)-CAGGTACTACCCGTTCCGGC        |
| 886. rrs-rrl_W_30_R  | 1475747 | 1475886 CCCTTGGGGTTAACGGGTCT-(BRIDGE)-AGTTGAGAAGTCTTACGCCATTCGTGC          |
| 887. rrs-rrl_W_32_R  | 1476027 | 1476166 GCCCAACTGGCGTCGAGTTTC-(BRIDGE)-CATTTTAGGAGGCAACCGCCCAAG            |
| 888. rrs-rrl_W_33_R  | 1476167 | 1476306 GGAACCTTTGGGCGCTCCGTTA-(BRIDGE)-TCCACTCGGGGTGCCGGAT                |
| 889. rrs-rrl_W_34_R  | 1476307 | 1476446 CTTTTATCCGTTGAGCGACACCCT-(BRIDGE)-GCCAACCTTGGGACCTGCT              |
| 890. rrs-rrl_W_35_R  | 1476447 | 1476586 CGTCCGCTTAAATGGGCGAACA-(BRIDGE)-GTGACCAAGAGGTTCTGCTCGTCC           |
| 891. rrs-rrl_W_36_R  | 1476587 | 1476726 TGCCCTGGCGGGAACAATG-(BRIDGE)-TGAACCCGTGTTCTGCGGGGG                 |
| 892. rrs-rrl_W_3_R   | 1471967 | 1472106 CCCGAAGTGCAGGGCAGATACC-(BRIDGE)-CACCCCAACAAGCTGATAGGCC             |
| 893. rrs-rrl_W_4_R   | 1472107 | 1472246 TCGTGCCTTGGTAGGCCGT-(BRIDGE)-CGGCGTGCCTGATCAGGCT                   |
| 894. rrs-rrl_W_5_R   | 1472247 | 1472386 CGAAGCGCTATCCCCACG-(BRIDGE)-CGCTCGCACCTACGTATTACCGC                |
| 895. rrs-rrl_W_6_R   | 1472387 | 1472526 GCTCTTACGCCAGTAATCCGGACA-(BRIDGE)-CGTACACCAGGAATCCAGTCTCC          |
| 896. rrs-rrl_W_7_R   | 1472527 | 1472666 TGTTCTCTGATATCTGCGCATCCAC-(BRIDGE)-CCTAGTACCACCGTTTACGGCGT         |
| 897. rrs-rrl_W_8_R   | 1472667 | 1472806 CGGATCCAAAGGAAGAAACCCACA-(BRIDGE)-TGATCGAATTAATCCATGCTCCGC         |
| 898. rrs-rrl_W_9_R   | 1472807 | 1472946 TCAAACCCAGGTAAGGTTCTTCGCGT-(BRIDGE)-TGCGCTGTTGCGGGACTTAAC          |
| 899. thyA_C_1_R      | 3074447 | 3074586 GGCGAAGCCGGGCACAGCGA-(BRIDGE)-GCAGCAGGCTCTGATGGCGT                 |
| 900. thyA_C_6_Ra     | 3073747 | 3073886 CCGGCCAGATGAACTCGCCGAC-(BRIDGE)-GTGACTCGAAGATTGAATCCCGGTCCG        |
| 901. thyA_C_6_R      | 3073747 | 3073886 CCGTCCAGATGAACTCGCCGAC-(BRIDGE)-GTGACTCGAAGATTGAATCCCGGTCCG        |
| 902. thyA_W_1_R      | 3074497 | 3074636 CTTCGCCGCTTGCATCG-(BRIDGE)-TGGCTCCGTTGACTCCTGTGG                   |
| 903. thyA_W_2_R      | 3074357 | 3074496 GGCCAGCAGATGCGCTATGATTTGT-(BRIDGE)-CCGCTAGGCTGACCCGCTGT            |
| 904. thyA_W_6_R      | 3073797 | 3073936 AGCTCAGCCGCGAGCCGCGG-(BRIDGE)-CCAGCTATCGTGTCTACCCAC                |
| 905. tlyA_C_5_R      | 1918375 | 1918514 CCACTACCAGGTGACGCGACC-(BRIDGE)-ACCTGACCTTTCCCACTCAAAGT             |

**Supplementary Table 4: Parameters used in the different software used to call variants from MIP read data.**

| <i>Program</i>                    | <i>Version</i> | <i>Parameters</i>                                                                                                   |
|-----------------------------------|----------------|---------------------------------------------------------------------------------------------------------------------|
| megablast<br>(used by MIPCleaner) | 2.2.14         | -p 90 -W 10 -e 1e-1 -X16 -JF -m8 -FF<br>-v9000000 -b9000000                                                         |
| Bowtie                            | 0.12.7         | -q -k 2 -l 20 -m 5 --best --strata<br>(with the additional filtering out of alignments with NM:i:x tags having x>5) |
| samtools                          | 0.1.18         | mpileup -u -R -B -q0 -Q0 -C0 -d1000000                                                                              |
| bcftools                          | 0.1.18         | view -vg -p0.05                                                                                                     |
| vcfutils.pl                       | 0.1.18         | varFilter -d 10 -a 5 -D1000000 -W10<br>-10 -20 -30 -40 -e0                                                          |
| Stampy                            | 1.0.23         | Default                                                                                                             |
| Platypus                          | 0.5.2          | Default. Filtered variants with platypusfilter='badreads' or quality≤30 or purity <40%.                             |

## Supplementary Table 8: Isolate count and major drug resistance profiles.

The count of isolates resistant to one or more of the first line drugs but not to both INH and RIF is the sum of the number in rows 4, 5 and 6. There were no strains resistant to PZA but sensitive to both INH and RIF. Note: INH DST results were missing for 20 strains, RIF DST results were missing for 6 strains, and 20 strains were missing DST data for both INH and RIF. \* INH: isoniazid, RIF: rifampicin, EMB: ethambutol, STR: Streptomycin, PZA: pyrazinamide. \*\* FLQ: Fluoroquinolones (Resistance defined as resistance to one or more of CIP, LEVO, OFLX, MOXI, and GATI). \*\*\*INJ: Second line Injectables (Resistance defined as resistance to more or more of KAN, CAP, AMK). R: resistant, S: sensitive, S<sup>†</sup>: sensitive or not tested. Blank cells imply any resistance status to the drug.

| <i>Description</i>                                   | <i>INH</i> | <i>RIF</i> | <i>EMB</i> | <i>STR</i> | <i>PZA</i>     | <i>FLQ</i> ** | <i>INJ</i> *** | <i>Number of isolates</i> |
|------------------------------------------------------|------------|------------|------------|------------|----------------|---------------|----------------|---------------------------|
|                                                      | S          |            |            |            |                |               |                | 136                       |
|                                                      |            | S          |            |            |                |               |                | 206                       |
| <i>Drug sensitive</i>                                | S          | S          | S          | S          | S <sup>†</sup> |               |                | 78                        |
| <i>INH-resistant not MDR</i>                         | R          | S          |            |            |                |               |                | 83                        |
| <i>RIF-resistant not MDR</i>                         | S          | R          |            |            |                |               |                | 21                        |
| <i>EMB or STR resistant, INH &amp; RIF sensitive</i> | S          | S          | R or       | R          |                |               |                | 37                        |
| <i>MDR +</i>                                         | R          | R          |            |            |                |               |                | 1130                      |
| <i>MDR (+PZA R)</i>                                  | R          | R          | S          |            | R              |               |                | 80                        |
| <i>MDR (+EMB R)</i>                                  | R          | R          | R          |            | S              |               |                | 203                       |
| <i>MDR (+EMB &amp; PZA R)</i>                        | R          | R          | R          |            | R              |               |                | 499                       |
| <i>MDR (+FLQ R)</i>                                  | R          | R          |            |            |                | R             | S              | 44                        |
| <i>MDR (+INJ R)</i>                                  | R          | R          |            |            |                | S             | R              | 384                       |
| <i>XDR</i>                                           | R          | R          |            |            |                | R             | R              | 219                       |

### Supplementary Table 9: Representative coverage statistics per strain.

The table lists the number of raw and filtered reads and the numbers and percentages of nucleotides covered by at least one, 20 or 100 reads for each strain. The average across the 1397 strains for coverage of  $\geq 20$  reads was 97.1%. Strain CDC-26 and all strains with less than 95% 20 fold coverage were excluded from the analysis.

| <b>Strain</b>  | <b>Raw</b> | <b>Filtered</b> | <b>%</b>    | <b>Mapped</b> | <b>%</b>     | <b>total bases</b> | <b>bases with &gt;1 reads</b> | <b>%</b> | <b>bases with &gt;20 reads</b> | <b>%</b>     | <b>bases with &gt;100 reads</b> | <b>%</b>     |
|----------------|------------|-----------------|-------------|---------------|--------------|--------------------|-------------------------------|----------|--------------------------------|--------------|---------------------------------|--------------|
| <b>CDC-1</b>   | 1332475    | 661480          | 49.64       | 593186        | 89.67        | 42367              | 42181                         | 99.56    | 40538                          | 95.68        | 36928                           | 87.16        |
| <b>CDC-2</b>   | 1140934    | 888377          | 77.86       | 834275        | 93.91        | 42367              | 42076                         | 99.31    | 39969                          | 94.33        | 37714                           | 89.01        |
| <b>CDC-3</b>   | 1127476    | 864265          | 76.65       | 813794        | 94.16        | 42367              | 42160                         | 99.51    | 40103                          | 94.65        | 37044                           | 87.43        |
| <b>CDC-4</b>   | 1271267    | 977264          | 76.87       | 916578        | 93.79        | 42367              | 42307                         | 99.85    | 40597                          | 95.82        | 38274                           | 90.33        |
| <b>CDC-5</b>   | 1280316    | 1019478         | 79.62       | 956616        | 93.83        | 42367              | 42058                         | 99.27    | 40189                          | 94.85        | 38270                           | 90.32        |
| <b>CDC-6</b>   | 1425663    | 788775          | 55.32       | 718103        | 91.04        | 42367              | 42254                         | 99.73    | 40625                          | 95.88        | 37577                           | 88.69        |
| <b>CDC-7</b>   | 1182549    | 884482          | 74.79       | 826942        | 93.49        | 42367              | 42123                         | 99.42    | 39872                          | 94.11        | 37231                           | 87.87        |
| <b>CDC-8</b>   | 802869     | 507251          | 63.17       | 465113        | 91.69        | 42367              | 42187                         | 99.57    | 40077                          | 94.59        | 35555                           | 83.92        |
| <b>CDC-9</b>   | 1131109    | 926413          | 81.90       | 873982        | 94.34        | 42367              | 42288                         | 99.81    | 40479                          | 95.54        | 37849                           | 89.33        |
| <b>CDC-10</b>  | 1183926    | 1025972         | 86.65       | 969370        | 94.48        | 42367              | 41816                         | 98.69    | 39888                          | 94.14        | 38117                           | 89.96        |
| <b>CDC-11</b>  | 1241962    | 857267          | 69.02       | 796556        | 92.91        | 42367              | 42182                         | 99.56    | 39990                          | 94.38        | 37696                           | 88.97        |
| <b>CDC-12</b>  | 1258136    | 803934          | 63.89       | 743964        | 92.54        | 42367              | 42300                         | 99.84    | 40776                          | 96.24        | 37703                           | 88.99        |
| <b>CDC-13</b>  | 1483784    | 872030          | 58.77       | 805457        | 92.36        | 42367              | 42221                         | 99.65    | 40469                          | 95.52        | 37783                           | 89.18        |
| <b>CDC-14</b>  | 1408847    | 619702          | 43.98       | 549706        | 88.70        | 42367              | 42301                         | 99.84    | 40902                          | 96.54        | 36777                           | 86.80        |
| <b>CDC-15</b>  | 1197985    | 879377          | 73.40       | 823343        | 93.62        | 42367              | 42019                         | 99.17    | 39787                          | 93.91        | 37869                           | 89.38        |
| <b>CDC-16</b>  | 1439593    | 548695          | 38.11       | 476889        | 86.91        | 42367              | 42231                         | 99.67    | 40406                          | 95.37        | 36037                           | 85.05        |
| <b>CDC-17</b>  | 1392928    | 863975          | 62.02       | 796024        | 92.13        | 42367              | 42277                         | 99.78    | 40720                          | 96.11        | 37851                           | 89.34        |
| <b>CDC-18</b>  | 1390106    | 1035578         | 74.49       | 970765        | 93.74        | 42367              | 42241                         | 99.70    | 40445                          | 95.46        | 38065                           | 89.84        |
| <b>CDC-19</b>  | 1350358    | 937661          | 69.43       | 872850        | 93.08        | 42367              | 42017                         | 99.17    | 39767                          | 93.86        | 37584                           | 88.71        |
| <b>CDC-20</b>  | 1100454    | 790026          | 71.79       | 736114        | 93.17        | 42367              | 42134                         | 99.45    | 40307                          | 95.13        | 37441                           | 88.37        |
| <b>CDC-21</b>  | 1196697    | 915027          | 76.46       | 860158        | 94.00        | 42367              | 41938                         | 98.98    | 39796                          | 93.93        | 37465                           | 88.42        |
| <b>CDC-22</b>  | 1143123    | 1011827         | 88.51       | 960456        | 94.92        | 42367              | 42236                         | 99.69    | 40458                          | 95.49        | 38003                           | 89.69        |
| <b>CDC-23</b>  | 971048     | 444426          | 45.76       | 396557        | 89.22        | 42367              | 42121                         | 99.41    | 39808                          | 93.95        | 34544                           | 81.53        |
| <b>CDC-24</b>  | 1191376    | 647398          | 54.34       | 592547        | 91.52        | 42367              | 42080                         | 99.32    | 40134                          | 94.72        | 36684                           | 86.58        |
| <b>CDC-25</b>  | 1592348    | 1050713         | 65.98       | 978170        | 93.09        | 42367              | 42294                         | 99.82    | 40650                          | 95.94        | 38425                           | 90.69        |
| <b>CDC-26</b>  | 2125259    | <u>153823</u>   | <u>7.23</u> | <u>27156</u>  | <u>17.65</u> | 42367              | 42019                         | 99.17    | <u>29487</u>                   | <u>69.59</u> | <u>4648</u>                     | <u>10.97</u> |
| <b>CDC-27</b>  | 1468007    | 685090          | 46.66       | 617514        | 90.13        | 42367              | 42194                         | 99.59    | 40164                          | 94.80        | 37057                           | 87.46        |
| <b>CDC-28</b>  | 1435655    | 933140          | 64.99       | 870938        | 93.33        | 42367              | 42121                         | 99.41    | 40045                          | 94.51        | 38186                           | 90.13        |
| <b>CDC-29</b>  | 1547957    | 985023          | 63.63       | 913906        | 92.78        | 42367              | 42326                         | 99.90    | 40965                          | 96.69        | 38449                           | 90.75        |
| <b>CDC-30</b>  | 1501204    | 1070529         | 71.31       | 1004002       | 93.78        | 42367              | 42299                         | 99.83    | 40523                          | 95.64        | 38377                           | 90.58        |
| <b>Average</b> | 1310514    | 821633          | 64.41       | 758701        | 90.00        | 42367              | 42167                         | 99.52    | 39931                          | 94.25        | 36373                           | 85.85        |

## Supplementary Table 10: Bases detected with WGS for the SNPs called using MIPs.

For each strain in which MIPs detected additional SNPs, the SNPs are listed with genomic coordinates, reference and variant base, reference base, depth of coverage, and bases detected with WGS. (uppercase/lowercase letter=base in +/- direction and ./, = reference base in +/- direction). These data show that the SNP detected by MIPs was frequently a WGS low coverage site (<20 reads). In 80/84 cases WGS detected the MIP allele as a minor allele with a read count of <20.

| Strain/SNP      | Reference base | Depth | Bases detected (./, = reference base in +/- direction) |
|-----------------|----------------|-------|--------------------------------------------------------|
| <b>01-R0450</b> |                |       |                                                        |
| 1673818AG       | A              | 38    | ,.....                                                 |
| 4247884CA       | C              | 19    | AA,aaAaAaAa,aAaAAaa                                    |
| <b>01-R0572</b> |                |       |                                                        |
| 761161TC        | T              | 19    | CcCccCCcCCcCcCCcCcc                                    |
| 4242182GT       | G              | 18    | tTtTtTtTtTttttctt                                      |
| <b>02-R1848</b> |                |       |                                                        |
| 9304GA          | G              | 19    | CAaAaaAAaaaAaaAaAaa                                    |
| 1917972AG       | A              | 13    | GGggGGgGgGGgG                                          |
| 3073852TC       | T              | 17    | cCCcCcccccccCcccc                                      |
| 4242803GC       | G              | 18    | CCCCCCcCCcCCcCCCC                                      |
| 4247729GA       | G              | 14    | AAAAaaaaaAaAaa                                         |
| <b>03-R0268</b> |                |       |                                                        |
| 9304GA          | G              | 19    | AaaAAAAAAaa,AAaAaAA                                    |
| 761155CT        | C              | 20    | .t...,t...,T,.,.,                                      |
| 4242643CT       | C              | 18    | tTTtTTttTtTTtT                                         |
| <b>03-R0303</b> |                |       |                                                        |
| 4408091GT       | G              | 6     | TT,.,.                                                 |
| 4408092TC       | T              | 9     | CC,.,.c..                                              |
| <b>03-R0483</b> |                |       |                                                        |
| 763031TC        | T              | 15    | CccccCcCccCcCc                                         |
| 4326996GC       | G              | 37    | C,,T,,,,,.....C.,.,.,.                                 |
| <b>03-R0888</b> |                |       |                                                        |
| 4408156AC       | A              | 15    | cccCCCccccccCC                                         |
| 4408159CG       | C              | 14    | gGGGGggggggGGg                                         |
| <b>03-R1082</b> |                |       |                                                        |
| 2155783GA       | G              | 18    | a,aaCA,a,AaAa.AAa                                      |
| 3073868TC       | T              | 17    | cCccccCCcCAccCcc                                       |
| <b>04-R0292</b> |                |       |                                                        |
| 761155CT        | C              | 17    | TtttTtTtTtTtTgtg                                       |
| 761156GC        | G              | 17    | CcccCCcCccCcccc                                        |
| 1917972AG       | A              | 15    | GGggGgggGgGGggg                                        |
| 4408091GT       | G              | 15    | tTTTtCT,.,.,.,.                                        |
| 4408092TC       | T              | 14    | CCcCC,.,g...c                                          |
| <b>CDC-604</b>  |                |       |                                                        |
| 781687AG        | A              | 19    | GgGgGgggggggGgGgGgg                                    |
| 4407927TG       | T              | 17    | GggGGggGgGgGggggG                                      |
| <b>CDC-605</b>  |                |       |                                                        |
| 781395TC        | T              | 17    | cccCcCccccCCcCc                                        |

| Strain/SNP     | Reference base | Depth | Bases detected (./, = reference base in +/- direction)           |
|----------------|----------------|-------|------------------------------------------------------------------|
| 1673425CT      | C              | 12    | ttTtTtTgTTgt                                                     |
| <b>CDC-606</b> |                |       |                                                                  |
| 2289103TC      | T              | 16    | cGcCcCCCCCccCCC                                                  |
| 4242643CT      | C              | 10    | TTTTtGTtT                                                        |
| 4243460CT      | C              | 19    | ttttTtTtTtTtTtTt                                                 |
| 4326996GA      | G              | 21    | ,,,,,,,,,,,,,,,,,,,,,,                                           |
| 4407927TG      | T              | 19    | GGGGggGGGGGg.ggGggG                                              |
| <b>CDC-607</b> |                |       |                                                                  |
| 4242643CT      | C              | 14    | ttTtTTTTtTtTt                                                    |
| <b>CDC-608</b> |                |       |                                                                  |
| 7362GC         | G              | 18    | CCcccccccCcccCcccc                                               |
| 7582AC         | A              | 14    | CCCCcCcCcCccc                                                    |
| 7585GC         | G              | 13    | CCcCcCcCcccC                                                     |
| 9304GA         | G              | 19    | aaa.AaAAa,AAaAaaaa                                               |
| 763031TC       | T              | 14    | ccCcCccccCcCc                                                    |
| 781395TC       | T              | 16    | CcCcCcCCcCCcCcCC                                                 |
| 1917972AG      | A              | 15    | GggggGgGGGggGGG                                                  |
| 2154724CA      | C              | 16    | ,aAAaAAAAaaAAa                                                   |
| 2288775AG      | A              | 18    | GGGCGgGGGGGgggggGg                                               |
| 4242643CT      | C              | 19    | tt,ttttTttTtTgTTT                                                |
| 4243460CT      | C              | 15    | TttttTtTttgT                                                     |
| 4407588TC      | T              | 18    | CcCcccCCcCcCcCcCc                                                |
| 4407620AG      | A              | 19    | gGgGGGGGgGGgGGGCggg                                              |
| <b>CDC-610</b> |                |       |                                                                  |
| 1476468CT      | C              | 63    | ,,,,,,,,,,,,,,,,,,,,,,,,,,,,,,,,,,,,,,,,,,,,,,,,,,,,,,a,,,,,,,,, |
| <b>M200HiQ</b> |                |       |                                                                  |
| 3841083AC      | A              | 13    | cCcCccCCcccCc                                                    |
| <b>M230HiQ</b> |                |       |                                                                  |
| 7582AC         | A              | 8     | Ccccccc                                                          |
| 7585GC         | G              | 11    | CccccccCCc                                                       |
| 9304GA         | G              | 11    | aAA.AcA.aA.                                                      |
| 761155CT       | C              | 13    | ttTtttTTtgg                                                      |
| 1917972AG      | A              | 14    | GGggGGgggggggG                                                   |
| 4242643CT      | C              | 19    | ttttTtTtttTTTTt                                                  |
| <b>M27HiQ</b>  |                |       |                                                                  |
| 7362GC         | G              | 10    | ccCCCcCCca                                                       |
| 7582AG         | A              | 12    | CGGggGGgGgGg                                                     |
| 7585GC         | G              | 11    | CCcCCcCcCc                                                       |
| 9304GA         | G              | 10    | AaAAaaAaAa                                                       |
| 761155CT       | C              | 12    | tTtTgTTTggt                                                      |
| 781395TC       | T              | 10    | CcCcccCCCC                                                       |
| 781435GC       | G              | 14    | cCcCCcCcCCcCC                                                    |
| 781687AG       | A              | 11    | ggggGggGGgg                                                      |
| 781922AG       | A              | 14    | GGgggggggggggG                                                   |
| 1917972AG      | A              | 7     | GggggGG                                                          |
| 2155168CG      | C              | 14    | gG,gGgGgGGGGgg                                                   |





## Supplementary Table 11: Mutations missed by MIPs and detected by Sanger.

Sanger sequencing was performed in 133 strains with MIP results that did not explain the resistance phenotype.

| Isolate ID | gene        | Genomic coordinate (gene coord) | Sanger detected variant | Note                              |
|------------|-------------|---------------------------------|-------------------------|-----------------------------------|
| 2419       | <i>embB</i> | 4249195 (codon 894)             | A                       | High coverage but no variant      |
| 2304       | <i>rhl</i>  | 1476698                         | G                       | High coverage but no variant      |
| 825        | <i>katG</i> | 2153739                         | delcgagacgggat          | long deletion                     |
| 737        | <i>pncA</i> | 2288862                         | delAGGTCGATG            | long deletion                     |
| 711        | <i>pncA</i> | 2288862                         | delAGGTCGATG            | long deletion                     |
| 2227       | <i>pncA</i> | 2289016                         | delACTCCCGGCGC          | long deletion                     |
| 2252       | <i>pncA</i> | 2288862                         | delAGGTCGATG            | long deletion                     |
| 781        | <i>rhl</i>  | 1475790 (3945)                  | insC                    | Low coverage <5 reads at the site |
| 2498       | <i>rrs</i>  | 1472723 (878)                   | G                       | Low coverage <5 reads at the site |
| 2315       | <i>pncA</i> | 2289099                         | T                       | low mapping quality               |
| 2321       | <i>pncA</i> | 2288752                         | A                       | low mapping quality               |
| 2523       | <i>pncA</i> | 2288740                         | T                       | low mapping quality               |
| 2320       | <i>pncA</i> | 2289099                         | T                       | low mapping quality               |
| 2222       | <i>pncA</i> | 2289099                         | T                       | low mapping quality               |
| 2266       | <i>rrs</i>  | 1473246 (1401)                  | A                       | Minor allele in 28% of reads      |
| 763        | <i>rrs</i>  | 1473246 (1401)                  | A                       | Minor allele in 24% of reads      |
| 2445       | <i>rrs</i>  | 1473246 (1401)                  | A                       | Minor allele in 33% of reads      |
| 2316       | <i>pncA</i> | 2289066                         | G                       | Minor allele in 31% of reads      |

## Supplementary Table 12: Number of variants found in each locus targeted.

\*only non-synonymous or non-coding/promoter mutations were included in the count. See Supplementary Table 2 for H37Rv gene coordinates targeted, in addition 100bp of 5' and 3' flanking sequence was targeted to capture neighboring promoter regions. Region labeled promoter if it precedes one or more genes designated to be an operon on the +/sense strand, or it follows such genes on the -/anti-sense strand.

| Sequenced Region               | number of different variants* | Length | Diversity |
|--------------------------------|-------------------------------|--------|-----------|
| <b>promoter_ahpC</b>           | 15                            | 105    | 14%       |
| <b>ahpC</b>                    | 20                            | 588    | 3%        |
| <b>alr</b>                     | 26                            | 1227   | 2%        |
| <b>ddl</b>                     | 19                            | 1122   | 2%        |
| <b>embA</b>                    | 63                            | 3285   | 2%        |
| <b>embB</b>                    | 107                           | 3297   | 3%        |
| <b>embC</b>                    | 50                            | 3285   | 2%        |
| <b>ethA</b>                    | 262                           | 1470   | 18%       |
| <b>gid</b>                     | 173                           | 675    | 26%       |
| <b>gyrA</b>                    | 77                            | 2517   | 3%        |
| <b>gyrB</b>                    | 52                            | 2145   | 2%        |
| <b>inhA</b>                    | 13                            | 810    | 2%        |
| <b>iniA</b>                    | 37                            | 1923   | 2%        |
| <b>iniB</b>                    | 21                            | 1440   | 1%        |
| <b>iniC</b>                    | 22                            | 1482   | 1%        |
| <b>kasA</b>                    | 30                            | 1251   | 2%        |
| <b>katG</b>                    | 192                           | 2223   | 9%        |
| <b>intergenic_murA-rrs</b>     | 6                             | 126    | 5%        |
| <b>fabG1</b>                   | 13                            | 744    | 2%        |
| <b>ndh</b>                     | 31                            | 1392   | 2%        |
| <b>oxyR'</b>                   | 4                             | 517    | 1%        |
| <b>pncA</b>                    | 254                           | 561    | 45%       |
| <b>rpoB</b>                    | 169                           | 3519   | 5%        |
| <b>rpsL</b>                    | 8                             | 375    | 2%        |
| <b>rri</b>                     | 219                           | 3138   | 7%        |
| <b>rrs</b>                     | 142                           | 1537   | 9%        |
| <b>thyA</b>                    | 45                            | 792    | 6%        |
| <b>tlyA</b>                    | 30                            | 807    | 4%        |
| <b>promoter_gyrB-gyrA</b>      | 5                             | 125    | 4%        |
| <b>intergenic_gyrB-gyrA</b>    | 3                             | 34     | 9%        |
| <b>intergenic_gyrA-Rv0007</b>  | 3                             | 95     | 3%        |
| <b>promoter_iniB-iniA-iniC</b> | 5                             | 176    | 3%        |
| <b>intergenic_iniB-iniA</b>    | 2                             | 36     | 6%        |
| <b>promoter_rpoB</b>           | 2                             | 143    | 1%        |
| <b>intergenic_iniC-lpqJ</b>    | 4                             | 126    | 3%        |
| <b>intergenic_rpoB-rpoC</b>    | 0                             | 45     | 0%        |
| <b>promoter_rpsL</b>           | 7                             | 217    | 3%        |
| <b>promoter_fabG1-inhA</b>     | 8                             | 140    | 6%        |
| <b>intergenic_rrs-rri</b>      | 11                            | 275    | 4%        |

|                               |             |     |     |
|-------------------------------|-------------|-----|-----|
| <i>intergenic_rrl-rrf</i>     | 3           | 101 | 3%  |
| <i>intergenic_fabG1-inhA</i>  | 1           | 18  | 6%  |
| <i>intergenic_inhA-hemZ</i>   | 0           | 5   | 0%  |
| <i>intergenic_Rv1693-tlyA</i> | 0           | 7   | 0%  |
| <i>promoter_ndh</i>           | 3           | 141 | 2%  |
| <i>intergenic_katG-furA</i>   | 7           | 34  | 21% |
| <i>promoter_pncA</i>          | 8           | 40  | 20% |
| <i>intergenic_kasA-kasB</i>   | 1           | 30  | 3%  |
| <i>intergenic_ahpC-ahpD</i>   | 0           | 24  | 0%  |
| <i>intergenic_dfrA-thyA</i>   | 3           | 70  | 4%  |
| <i>promoter_thyA</i>          | 12          | 164 | 7%  |
| <i>promoter_ddl</i>           | 3           | 77  | 4%  |
| <i>intergenic_alr-Rv3792</i>  | 2           | 128 | 2%  |
| <i>promoter_embA-embB</i>     | 18          | 85  | 21% |
| <i>intergenic_embB-Rv3796</i> | 18          | 67  | 27% |
| <i>intergenic_menG-ethA</i>   | 0           | 35  | 0%  |
| <i>promoter_ethA</i>          | 5           | 75  | 7%  |
| <i>promoter_gid</i>           | 7           | 131 | 5%  |
| <b>total</b>                  | <b>2241</b> |     |     |

\* only non-synonymous variants, or non-coding/promoter variants are included in the count

### Supplementary Table 13: Results of univariate analysis associating mutations with drug resistance across the 1397 strain set.

The results are for the purpose of data description and were not used in the subsequent predictive modeling. The Fisher Exact test was used. Only significant mutations are shown in order of their odds ratio (OR). Bonferroni corrected P-value=raw P-value\*total number of mutations tested, for each drug. The number of variables/drug is listed in Supplementary Table 6 under 'Including Singleton Variables'. Of the 54 mutations listed 47 were positively associated (*i.e.* OR>1). Resist: Resistant isolate, Sens: Sensitive isolate.

| Variant                        | Drug | Resist with | Sens with | Resist without | Sens without | OR    | corr P-value |
|--------------------------------|------|-------------|-----------|----------------|--------------|-------|--------------|
| SNP_N_1473246_A1401G_rrs       | AMK  | 186         | 14        | 42             | 715          | 222.9 | 8.01E-134    |
| SNP_N_1472359_A514C_rrs        | AMK  | 45          | 27        | 183            | 702          | 6.4   | 2.56E-10     |
| SNP_N_1473246_A1401G_rrs       | CAP  | 193         | 16        | 384            | 347          | 10.9  | 4.48E-27     |
| SNP_N_1473343_G1498T_rrs       | CAP  | 15          | 31        | 562            | 332          | 0.3   | 1.13E-02     |
| SNP_CN_7582_AG_gyrA_D94G       | CIP  | 48          | 0         | 167            | 695          | Inf   | 6.17E-30     |
| SNP_CN_6735_AC_gyrB_N538T      | CIP  | 7           | 0         | 208            | 695          | Inf   | 3.89E-03     |
| SNP_CN_7581_GT_gyrA_D94Y       | CIP  | 6           | 0         | 209            | 695          | Inf   | 1.26E-02     |
| SNP_CN_7570_CT_gyrA_A90V       | CIP  | 31          | 2         | 184            | 693          | 58.1  | 6.67E-16     |
| SNP_CN_7582_AC_gyrA_D94A       | CIP  | 15          | 1         | 200            | 694          | 51.8  | 7.02E-07     |
| SNP_CN_7572_TC_gyrA_S91P       | CIP  | 7           | 1         | 208            | 694          | 23.3  | 1.66E-02     |
| SNP_CS_6208_GA_gyrB_A362A      | CIP  | 10          | 2         | 205            | 693          | 16.8  | 2.34E-03     |
| SNP_CN_6140_GT_gyrB_V340L      | CIP  | 14          | 9         | 201            | 686          | 5.3   | 1.05E-02     |
| SNP_CN_4243392_AG_embA_N54D    | EMB  | 40          | 0         | 874            | 416          | Inf   | 1.42E-04     |
| SNP_CN_4247429_AG_embB_M306V   | EMB  | 272         | 12        | 642            | 404          | 14.2  | 2.71E-32     |
| SNP_CN_4248003_AG_embB_Q497R   | EMB  | 40          | 2         | 874            | 414          | 9.5   | 1.11E-02     |
| SNP_CN_4247431_GC_embB_M306I   | EMB  | 85          | 7         | 829            | 409          | 6.0   | 1.99E-05     |
| SNP_CN_4247431_GA_embB_M306I   | EMB  | 160         | 19        | 754            | 397          | 4.4   | 8.23E-09     |
| SNP_CN_409569_GA_iniB_A70T     | EMB  | 66          | 8         | 848            | 408          | 4.0   | 1.46E-02     |
| SNP_CS_412316_CG_iniA_G493G    | EMB  | 138         | 118       | 776            | 298          | 0.4   | 1.99E-05     |
| SNP_CS_4247887_CG_embB_G458G   | EMB  | 102         | 97        | 812            | 319          | 0.4   | 1.99E-05     |
| SNP_CN_4242075_GA_embC_R738Q   | EMB  | 8           | 20        | 906            | 396          | 0.2   | 4.97E-03     |
| SNP_CN_1674263_TC_inhA_I21T    | ETH  | 30          | 1         | 582            | 373          | 19.2  | 6.50E-03     |
| SNP_CN_4326116_GA_ethA_T453I   | ETH  | 26          | 1         | 586            | 373          | 16.5  | 2.38E-02     |
| SNP_CN_4326333_CG_ethA_A381P   | ETH  | 51          | 4         | 561            | 370          | 8.4   | 1.52E-04     |
| SNP_P_1673425_CT.15_fabG1-inhA | ETH  | 194         | 30        | 418            | 344          | 5.3   | 2.38E-16     |
| SNP_CS_4326259_CT_ethA_L405L   | ETH  | 4           | 17        | 608            | 357          | 0.1   | 3.15E-02     |
| SNP_CN_7582_AG_gyrA_D94G       | GATI | 13          | 1         | 13             | 27           | 25.4  | 6.61E-03     |
| SNP_CN_4247431_GA_embB_M306I   | INH  | 188         | 0         | 1031           | 136          | Inf   | 1.04E-06     |
| SNP_CN_2155168_CG_katG_S315T   | INH  | 874         | 2         | 345            | 134          | 169.0 | 6.38E-60     |
| SNP_P_1673425_CT.15_fabG1-inhA | INH  | 264         | 2         | 955            | 134          | 18.5  | 6.83E-08     |
| SNP_CN_4247429_AG_embB_M306V   | INH  | 280         | 7         | 939            | 129          | 5.5   | 1.14E-04     |
| SNP_N_1473246_A1401G_rrs       | KAN  | 160         | 8         | 97             | 623          | 127.4 | 8.26E-93     |
| SNP_CN_7582_AC_gyrA_D94A       | LEVO | 6           | 0         | 104            | 437          | Inf   | 3.48E-03     |
| SNP_CN_7581_GT_gyrA_D94Y       | LEVO | 5           | 0         | 105            | 437          | Inf   | 1.34E-02     |
| SNP_CN_7582_AG_gyrA_D94G       | LEVO | 38          | 1         | 72             | 436          | 228.1 | 9.10E-26     |
| SNP_CN_7570_CT_gyrA_A90V       | LEVO | 25          | 1         | 85             | 436          | 126.8 | 1.18E-15     |
| SNP_CN_6735_AC_gyrB_N538T      | LEVO | 6           | 1         | 104            | 436          | 24.9  | 1.34E-02     |
| SNP_CS_6208_GA_gyrB_A362A      | LEVO | 8           | 2         | 102            | 435          | 16.9  | 3.48E-03     |
| SNP_CN_6140_GT_gyrB_V340L      | LEVO | 11          | 5         | 99             | 432          | 9.5   | 1.92E-03     |
| SNP_CN_7581_GA_gyrA_D94N       | OFLX | 7           | 1         | 62             | 200          | 22.3  | 2.97E-02     |
| SNP_CN_7582_AC_gyrA_D94A       | OFLX | 10          | 2         | 59             | 199          | 16.6  | 3.27E-03     |
| SNP_CN_7570_CT_gyrA_A90V       | OFLX | 14          | 6         | 55             | 195          | 8.2   | 2.89E-03     |

|                              |      |     |    |      |     |      |          |
|------------------------------|------|-----|----|------|-----|------|----------|
| SNP_CN_7582_AG_gyrA_D94G     | OFLX | 22  | 11 | 47   | 190 | 8.0  | 3.53E-05 |
| SNP_CN_3073852_TC_thyA_H207R | PAS  | 5   | 1  | 73   | 848 | 57.5 | 2.72E-03 |
| SNP_CN_3074449_AT_thyA_L8Q   | PAS  | 5   | 2  | 73   | 847 | 28.8 | 4.45E-03 |
| SNP_CN_2289090_TC_pncA_H51R  | PZA  | 49  | 0  | 562  | 374 | Inf  | 6.65E-08 |
| SNP_CN_2289202_AC_pncA_C14G  | PZA  | 0   | 10 | 611  | 364 | 0.0  | 3.63E-02 |
| SNP_CN_761155_CT_rpoB_S450L  | RIF  | 739 | 5  | 424  | 201 | 70.0 | 1.40E-66 |
| SNP_CN_761110_AT_rpoB_D435V  | RIF  | 140 | 1  | 1023 | 205 | 28.0 | 8.42E-07 |
| SNP_CS_762836_CG_rpoB_G1010G | RIF  | 178 | 58 | 985  | 148 | 0.5  | 1.00E-02 |
| SNP_CN_781822_AG_rpsL_K88R   | STR  | 30  | 0  | 911  | 414 | Inf  | 5.03E-03 |
| SNP_CN_781687_AG_rpsL_K43R   | STR  | 224 | 5  | 717  | 409 | 25.5 | 1.49E-29 |
| SNP_N_1472359_A514C_rrs      | STR  | 84  | 2  | 857  | 412 | 20.2 | 2.27E-09 |
| SNP_N_1473246_A1401G_rrs     | STR  | 225 | 25 | 716  | 389 | 4.9  | 2.20E-14 |

**Supplementary Table 14: Association between *embB* M306I and *embB* M306V mutations and isoniazid resistance stratified by ethambutol resistance.**

The p-value was calculated using the Fisher Exact test. Resist: resistant isolate. Sens: Sensitive isolate.

| EMB    | INH Resistant with <i>embB</i> 306 mutation | INH Resistant without <i>embB</i> 306 mutation | INH Sensitive with <i>embB</i> 306 mutation | INH Sensitive without <i>embB</i> 306 mutation | OR         | P-value |
|--------|---------------------------------------------|------------------------------------------------|---------------------------------------------|------------------------------------------------|------------|---------|
| Sens   | 19                                          | 278                                            | 0                                           | 115                                            | [1.9, Inf) | 0.002   |
| Resist | 160                                         | 732                                            | 0                                           | 20                                             | [1.1, Inf) | 0.03    |

### Supplementary Table 15: Promoter Regions and their association with drug resistance across the 1397 strain set.

The results are for the purpose of data description and were not used in the subsequent predictive modeling. Variants were counted regardless of their position within the presumptive promoter region (see online-only text). Strains with one or more promoter variants were tallied across the resistant and sensitive pools for each relevant drug.

| Promoter Region | Drug     | Resistant with Variant | Sensitive with Variant | Resistant without Variant | Sensitive without Variant | Raw P-value | Corrected P-value |
|-----------------|----------|------------------------|------------------------|---------------------------|---------------------------|-------------|-------------------|
| fabG1-inhA      | ETH      | 236                    | 46                     | 376                       | 328                       | 2.2E-16     | 3.08E-15          |
| fabG1-inhA      | INH      | 324                    | 3                      | 895                       | 133                       | 2.0E-13     | 2.80E-12          |
| pncA            | PZA      | 31                     | 3                      | 580                       | 371                       | 0.000       | 0.003             |
| embA-embB       | EMB      | 94                     | 20                     | 820                       | 396                       | 0.001       | 0.010             |
| embA-embB       | INH      | 112                    | 2                      | 1107                      | 134                       | 0.001       | 0.012             |
| iniB-iniA-iniC  | EMB      | 7                      | 11                     | 907                       | 405                       | 0.009       | 0.130             |
| iniB-iniA-iniC  | INH      | 13                     | 5                      | 1206                      | 131                       | 0.028       | 0.392             |
| rpoB            | RIF      | 20                     | 8                      | 1143                      | 198                       | 0.057       | 0.798             |
| ahpC            | INH      | 126                    | 9                      | 1093                      | 127                       | 0.230       | 1.000             |
| gyrB-gyrA       | LEV<br>O | 1                      | 2                      | 109                       | 435                       | 0.490       | 1.000             |
| ndh             | INH      | 4                      | 0                      | 1216                      | 136                       | 1           | 1                 |
| ethA            | ETH      | 6                      | 3                      | 606                       | 371                       | 1           | 1                 |
| gid             | STR      | 8                      | 3                      | 933                       | 411                       | 1           | 1                 |

**Supplementary Table 17: The minimum list of predictive variables by drug ordered by decreasing measure of predictive importance.**

INH

- 1 SNP\_CN\_2155168\_CG\_katG\_S315T
- 2 SNP\_P\_1673425\_CT.15\_fabG1.inhA
- 3 SNP\_CN\_4247429\_AG\_embB\_M306V
- 4 SNP\_CN\_4247431\_GA\_embB\_M306I
- 5 SNP\_CN\_1674481\_TG\_inhA\_S94A
- 6 SNP\_CN\_4247431\_GC\_embB\_M306I
- 7 SNP\_CN\_2155168\_CT\_katG\_S315N
- 8 SNP\_CN\_409569\_GA\_iniB\_A70T
- 9 SNP\_CN\_4247730\_GC\_embB\_G406A
- 10 SNP\_P\_1673423\_GT.17\_fabG1.inhA
- 11 SNP\_CN\_4247729\_GA\_embB\_G406S
- 12 SNP\_CN\_4247402\_TG\_embB\_S297A
- 13 SNP\_CN\_2518919\_GA\_kasA\_G269S
- 14 SNP\_CN\_2726338\_TG\_ahpC\_V49G
- 15 SNP\_P\_4243221\_CT.12\_embA.embB
- 16 SNP\_P\_1673432\_TC.8\_fabG1.inhA
- 17 SNP\_P\_1673432\_TG.8\_fabG1.inhA
- 18 SNP\_CN\_2155167\_GT\_katG\_S315R

RIF

- 1 SNP\_CN\_761155\_CT\_rpoB\_S450L
- 2 SNP\_CN\_761110\_AT\_rpoB\_D435V
- 3 SNP\_CN\_761139\_CT\_rpoB\_H445Y
- 4 SNP\_CN\_761140\_AG\_rpoB\_H445R
- 5 SNP\_CN\_761140\_AT\_rpoB\_H445L
- 6 SNP\_CN\_761155\_CG\_rpoB\_S450W
- 7 SNP\_CN\_761139\_CG\_rpoB\_H445D
- 8 SNP\_CN\_761277\_AT\_rpoB\_I491F
- 9 SNP\_CN\_760314\_GT\_rpoB\_V170F
- 10 SNP\_CN\_761109\_GT\_rpoB\_D435Y
- 11 SNP\_CN\_761161\_TC\_rpoB\_L452P
- 12 SNP\_CN\_761102\_AC\_rpoB\_Q432H
- 13 SNP\_CN\_761095\_TC\_rpoB\_L430P
- 14 SNP\_CN\_761155\_CA\_rpoB\_S450.

PZA

- 1 SNP\_CN\_2289090\_TC\_pncA\_H51R
- 2 SNP\_P\_2289252\_TC.30\_pncA
- 3 SNP\_CN\_2289070\_AG\_pncA\_F58L
- 4 SNP\_CN\_2288883\_AG\_pncA\_L120P
- 5 SNP\_CN\_2289213\_TG\_pncA\_Q10P
- 6 SNP\_CN\_2288839\_TG\_pncA\_T135P
- 7 SNP\_CN\_2289081\_GA\_pncA\_P54L



8 SNP\_CN\_2288883\_AC\_pncA\_L120R  
9 INS\_F\_2288725\_i516C\_pncA  
10 SNP\_CN\_2289016\_TG\_pncA\_T76P  
11 SNP\_CN\_2288953\_CT\_pncA\_G97S  
12 SNP\_CN\_2288933\_GC\_pncA\_Y103.  
13 SNP\_CN\_2288818\_TC\_pncA\_T142A  
14 SNP\_CN\_2288847\_CT\_pncA\_G132D  
15 SNP\_CN\_2289212\_CG\_pncA\_Q10H  
16 SNP\_CN\_2288841\_GA\_pncA\_A134V  
17 INS\_F\_2288851\_i390C\_pncA  
18 INS\_F\_2288887\_i354A\_pncA  
19 SNP\_CN\_2288848\_CT\_pncA\_G132S  
20 SNP\_P\_2289245\_TA.37\_pncA  
21 SNP\_CN\_2289207\_TC\_pncA\_D12G  
22 SNP\_CN\_2288820\_TG\_pncA\_Q141P  
23 SNP\_CN\_2288704\_CA\_pncA\_V180F  
24 SNP\_CN\_2288805\_GT\_pncA\_A146E  
25 SNP\_CN\_2289180\_AC\_pncA\_V21G  
26 SNP\_CN\_2288973\_AG\_pncA\_I90T  
27 INS\_F\_2288851\_i390CC\_pncA  
28 SNP\_CN\_2289216\_AC\_pncA\_V9G  
29 SNP\_CN\_2289072\_TA\_pncA\_H57L  
30 SNP\_CN\_2288887\_AC\_pncA\_W119G  
31 SNP\_CN\_2289097\_CT\_pncA\_D49N  
32 SNP\_CN\_2288805\_GA\_pncA\_A146V  
33 DEL\_F\_2288939\_d302TCCGGTGTAG\_pncA  
34 SNP\_CN\_2288988\_AG\_pncA\_L85P  
35 SNP\_CN\_2289207\_TG\_pncA\_D12A  
36 SNP\_CN\_2289228\_AG\_pncA\_I5T  
37 SNP\_CN\_2289220\_CT\_pncA\_D8N  
38 DEL\_F\_2289069\_d172A\_pncA\_F58L  
39 DEL\_N\_2288942\_d299GGTGTA\_pncA  
40 SNP\_CN\_2289015\_GA\_pncA\_T76I  
41 DEL\_F\_2288776\_d465GCACCCTG\_pncA  
42 SNP\_CN\_2288925\_AG\_pncA\_F106S  
43 SNP\_CN\_2288835\_TC\_pncA\_D136G  
44 SNP\_CN\_2289040\_AG\_pncA\_W68R  
45 SNP\_CN\_2289099\_TG\_pncA\_K48T  
46 SNP\_CN\_2289214\_GA\_pncA\_Q10.  
47 SNP\_CN\_2288944\_TG\_pncA\_T100P  
48 INS\_F\_2288825\_i416C\_pncA  
49 SNP\_CN\_2289042\_GT\_pncA\_S67.  
50 SNP\_CN\_2288826\_AG\_pncA\_V139A  
51 SNP\_CN\_2288878\_GA\_pncA\_Q122.  
52 SNP\_CN\_2288697\_AC\_pncA\_L182W

53 SNP\_CN\_2289073\_GA\_pncA\_H57Y  
54 SNP\_CN\_2289150\_AC\_pncA\_I31S  
55 SNP\_CN\_2288727\_AG\_pncA\_L172P  
56 SNP\_CN\_2288919\_CT\_pncA\_G108E  
57 SNP\_CN\_2288935\_AG\_pncA\_Y103H  
58 INS\_F\_2288835\_i406T\_pncA  
59 SNP\_CN\_2288952\_CT\_pncA\_G97D  
60 SNP\_CN\_2288697\_AG\_pncA\_L182S  
61 SNP\_CN\_2288853\_AT\_pncA\_V130E  
62 SNP\_CN\_2288730\_GA\_pncA\_A171V  
63 SNP\_CN\_2288775\_AG\_pncA\_L156P  
64 SNP\_CN\_2288850\_AC\_pncA\_V131G  
65 INS\_F\_2289009\_i232C\_pncA\_G78G  
66 INS\_F\_2289050\_i191T\_pncA\_Y64.  
67 SNP\_CN\_2288964\_AC\_pncA\_V93G  
68 SNP\_CN\_2288853\_AC\_pncA\_V130G  
69 DEL\_F\_2288697\_d544AACT\_pncA  
70 SNP\_CN\_2289009\_CA\_pncA\_G78V  
71 SNP\_CN\_2289043\_AG\_pncA\_S67P  
72 SNP\_CN\_2288938\_CG\_pncA\_A102P  
73 SNP\_P\_2289252\_TG.30\_pncA  
74 SNP\_CN\_2289073\_GC\_pncA\_H57D  
75 SNP\_CN\_2289206\_GC\_pncA\_D12E  
76 DEL\_F\_2289060\_d181GTGCCGGA\_pncA  
77 SNP\_CN\_2289202\_AG\_pncA\_C14R  
78 SNP\_CN\_2289050\_AT\_pncA\_Y64.  
79 SNP\_CN\_2289046\_AG\_pncA\_S66P  
80 SNP\_CN\_2288784\_GT\_pncA\_T153N  
81 SNP\_CN\_2289037\_GA\_pncA\_P69S  
82 SNP\_CN\_2288718\_AC\_pncA\_M175R  
83 SNP\_CN\_2289042\_GC\_pncA\_S67W  
84 SNP\_CN\_2288956\_TG\_pncA\_K96Q  
85 SNP\_CN\_2289142\_AC\_pncA\_Y34D  
86 SNP\_CN\_2288844\_AG\_pncA\_I133T  
87 SNP\_CN\_2289040\_AC\_pncA\_W68G  
88 SNP\_CN\_2289054\_TG\_pncA\_D63A  
89 SNP\_CN\_2289090\_TG\_pncA\_H51P  
90 SNP\_CN\_2289186\_AG\_pncA\_L19P  
91 SNP\_CN\_2288826\_AC\_pncA\_V139G  
92 SNP\_CN\_2288818\_TG\_pncA\_T142P  
93 SNP\_CN\_2288817\_GA\_pncA\_T142M  
94 SNP\_CN\_2289219\_TC\_pncA\_D8G  
95 SNP\_CN\_2289072\_TC\_pncA\_H57R  
96 SNP\_CN\_2289028\_AG\_pncA\_C72R  
97 INS\_F\_2288942\_i299T\_pncA

98 DEL\_F\_2288923\_d318C\_pncA  
99 SNP\_CN\_2288742\_GA\_pncA\_T167I  
100 SNP\_CN\_2289095\_GC\_pncA\_D49E  
101 SNP\_CN\_2288956\_TC\_pncA\_K96E  
102 SNP\_CN\_2288703\_AC\_pncA\_V180G  
103 SNP\_CN\_2289069\_AC\_pncA\_F58C  
104 SNP\_CN\_2288955\_TG\_pncA\_K96T  
105 SNP\_CN\_2288764\_TC\_pncA\_T160A  
106 SNP\_P\_2289251\_AC.31\_pncA  
107 SNP\_CN\_2288696\_CA\_pncA\_L182F  
108 SNP\_CN\_2288778\_AC\_pncA\_V155G  
109 SNP\_CN\_2289103\_TC\_pncA\_T47A  
110 SNP\_CN\_2288943\_GA\_pncA\_T100I  
111 SNP\_CN\_2288718\_AG\_pncA\_M175T  
112 SNP\_CN\_2289030\_TC\_pncA\_H71R  
113 SNP\_CN\_2289162\_AG\_pncA\_L27P  
114 SNP\_CN\_2289030\_TG\_pncA\_H71P  
115 SNP\_CN\_2288827\_CT\_pncA\_V139M  
116 SNP\_CN\_2289231\_AG\_pncA\_L4S  
117 SNP\_CN\_2289213\_TC\_pncA\_Q10R  
118 SNP\_CN\_2288965\_CA\_pncA\_V93L  
119 SNP\_CN\_2289001\_AC\_pncA\_F81V  
120 SNP\_CN\_2289054\_TC\_pncA\_D63G  
121 SNP\_CN\_2288766\_AC\_pncA\_L159R  
122 SNP\_CN\_2288869\_CA\_pncA\_V125F  
123 SNP\_CN\_2289091\_GA\_pncA\_H51Y  
124 SNP\_CN\_2288859\_AC\_pncA\_V128G

#### EMB

1 SNP\_CN\_4247429\_AG\_embB\_M306V  
2 SNP\_CN\_4247431\_GA\_embB\_M306I  
3 SNP\_CN\_4247431\_GC\_embB\_M306I  
4 SNP\_CN\_4247730\_GC\_embB\_G406A  
5 SNP\_CN\_4248003\_AG\_embB\_Q497R  
6 SNP\_CN\_4249518\_AG\_embB\_H1002R  
7 SNP\_CN\_409569\_GA\_iniB\_A70T  
8 SNP\_CN\_4247729\_GA\_embB\_G406S  
9 SNP\_CN\_4247431\_GT\_embB\_M306I  
10 SNP\_CN\_4247429\_AC\_embB\_M306L  
11 SNP\_P\_4243222\_CA.11\_embA\_embB  
12 SNP\_CN\_4247574\_AC\_embB\_D354A  
13 SNP\_CN\_4247495\_GT\_embB\_D328Y  
14 SNP\_CN\_4249583\_GA\_embB\_D1024N  
15 SNP\_CN\_4243392\_AG\_embA\_N54D  
16 SNP\_P\_4243225\_CT.8\_embA\_embB  
17 SNP\_CN\_4242182\_GT\_embC\_A774S

STR

18 SNP\_CN\_4247729\_GT\_embB\_G406C

1 SNP\_CN\_781687\_AG\_rpsL\_K43R  
2 SNP\_N\_1472359\_A514C\_rrs  
3 SNP\_CN\_781822\_AC\_rpsL\_K88T  
4 SNP\_N\_1473246\_A1401G\_rrs  
5 SNP\_CN\_781822\_AG\_rpsL\_K88R  
6 SNP\_CN\_4407809\_CA\_gid\_D132Y  
7 SNP\_N\_1472358\_C513T\_rrs  
8 SNP\_CN\_4407927\_TG\_gid\_E92D  
9 SNP\_N\_1472751\_A906G\_rrs  
10 SNP\_CN\_4407934\_AC\_gid\_L90R  
11 SNP\_N\_1472362\_C517T\_rrs  
12 SNP\_N\_1472753\_A908C\_rrs  
13 SNP\_CN\_781822\_AT\_rpsL\_K88M  
14 SNP\_CN\_4407832\_AG\_gid\_V124A  
15 SNP\_CN\_4408091\_GT\_gid\_P38T  
16 SNP\_I\_1473637\_A.21\_rrs.rrl  
17 SNP\_CN\_4408094\_CT\_gid\_G37R  
18 DEL\_F\_4407640\_d562A\_gid  
19 SNP\_N\_1473109\_T1264G\_rrs  
20 SNP\_CN\_4407967\_AC\_gid\_L79W  
21 SNP\_CN\_4407967\_AG\_gid\_L79S  
22 SNP\_CN\_4407768\_CA\_gid\_L145F  
23 SNP\_CN\_4407995\_TG\_gid\_S70R  
24 DEL\_F\_4407852\_d350C\_gid  
25 SNP\_N\_1473167\_T1322G\_rrs  
26 DEL\_F\_4408023\_d179T\_gid  
27 DEL\_F\_4408116\_d86G\_gid  
28 SNP\_CN\_4408060\_TG\_gid\_H48P  
29 SNP\_CN\_4408138\_TC\_gid\_Y22C  
30 SNP\_CN\_4408064\_GA\_gid\_R47W  
31 SNP\_CN\_4408148\_CG\_gid\_A19P  
32 SNP\_CN\_4407947\_GA\_gid\_L86F  
33 SNP\_CN\_4407916\_CA\_gid\_R96L  
34 SNP\_CN\_4407748\_AG\_gid\_L152S  
35 SNP\_N\_1473343\_G1498T\_rrs  
36 SNP\_CN\_4407985\_CG\_gid\_G73A  
37 SNP\_CN\_4408102\_CT\_gid\_G34E

ETH

1 SNP\_P\_1673425\_CT.15\_fabG1.inhA  
2 SNP\_CN\_4326333\_CG\_ethA\_A381P  
3 SNP\_CN\_4326116\_GA\_ethA\_T453I  
4 SNP\_CN\_1674481\_TG\_inhA\_S94A  
5 SNP\_CN\_4326714\_GA\_ethA\_Q254.

- 6 SNP\_CN\_1674263\_TC\_inhA\_I21T
- 7 SNP\_CN\_4327416\_CA\_ethA\_A20S
- 8 DEL\_F\_4326184\_d1289G\_ethA
- 9 SNP\_CN\_4327380\_AC\_ethA\_Y32D
- 10 SNP\_CN\_1674434\_TG\_inhA\_V78G
- 11 INS\_F\_4326141\_i1332C\_ethA
- 12 SNP\_CN\_4326600\_GA\_ethA\_R292.
- 13 SNP\_CN\_4326713\_TG\_ethA\_Q254P
- 14 SNP\_CN\_4326305\_GA\_ethA\_S390F
- 15 SNP\_P\_1673423\_GT.17\_fabG1.inhA
- 16 INS\_F\_4326722\_i751C\_ethA
- 17 SNP\_CN\_1673449\_AC\_fabG1\_T4P
- 18 SNP\_CN\_4327311\_AG\_ethA\_S55P
- 19 SNP\_CN\_4326278\_GT\_ethA\_S399.
- 20 SNP\_CN\_4327148\_CT\_ethA\_W109.

KAN

- 1 SNP\_N\_1473246\_A1401G\_rrs
- 2 SNP\_CN\_1918745\_AG\_tlyA\_.269W

CAP

- 1 SNP\_N\_1473246\_A1401G\_rrs
- 2 SNP\_N\_1473109\_T1264G\_rrs
- 3 SNP\_N\_1472753\_A908C\_rrs
- 4 SNP\_N\_1473160\_G1315A\_rrs
- 5 SNP\_N\_1473343\_G1498T\_rrs

AMK

- 1 SNP\_N\_1473246\_A1401G\_rrs
- 2 SNP\_N\_1472359\_A514C\_rrs

CIP

- 1 SNP\_CN\_7582\_AG\_gyrA\_D94G
- 2 SNP\_CN\_7570\_CT\_gyrA\_A90V
- 3 SNP\_CN\_7582\_AC\_gyrA\_D94A
- 4 SNP\_CN\_7581\_GT\_gyrA\_D94Y
- 5 SNP\_CN\_6735\_AC\_gyrB\_N538T
- 6 SNP\_CN\_7572\_TC\_gyrA\_S91P
- 7 SNP\_CN\_7566\_GA\_gyrA\_D89N

LEVO

- 1 SNP\_CN\_7582\_AG\_gyrA\_D94G
- 2 SNP\_CN\_7570\_CT\_gyrA\_A90V
- 3 SNP\_CN\_7581\_GT\_gyrA\_D94Y
- 4 SNP\_CN\_7581\_GA\_gyrA\_D94N
- 5 SNP\_CN\_7582\_AC\_gyrA\_D94A
- 6 SNP\_CN\_7572\_TC\_gyrA\_S91P
- 7 SNP\_CN\_7563\_GT\_gyrA\_G88C
- 8 SNP\_CN\_7566\_GA\_gyrA\_D89N

OFLX

- 1 SNP\_CN\_7582\_AG\_gyrA\_D94G
- 2 SNP\_CN\_7570\_CT\_gyrA\_A90V
- 3 SNP\_CN\_7582\_AC\_gyrA\_D94A
- 4 SNP\_CN\_7581\_GA\_gyrA\_D94N
- 5 SNP\_CN\_6735\_AC\_gyrB\_N538T
- 6 SNP\_CN\_7581\_GC\_gyrA\_D94H

PAS

- 1 SNP\_CN\_3073852\_TC\_thyA\_H207R
- 2 SNP\_CN\_3074449\_AT\_thyA\_L8Q
- 3 SNP\_CN\_3074182\_TC\_thyA\_Q97R
- 4 SNP\_P\_3074479\_AG.157\_thyA

**Supplementary Table 18: *rpoB* MTB H37RV – E.coli codon number conversion table**

| Genetic Variant                          | H37Rv codon number | E.coli codon number |
|------------------------------------------|--------------------|---------------------|
| SNP_CN_759814_AG_rpoB_D3G                | 3                  | 3                   |
| SNP_CN_759831_AC_rpoB_T9P                | 9                  | NA                  |
| SNP_CN_759861_CT_rpoB_Q19*               | 19                 | NA                  |
| SNP_CN_759873_AG_rpoB_N23D               | 23                 | NA                  |
| SNP_CN_759886_CA_rpoB_P27H               | 27                 | NA                  |
| SNP_CN_759903_GT_rpoB_V33F               | 33                 | 13                  |
| SNP_CN_759930_CT_rpoB_L42F               | 42                 | 22                  |
| SNP_CN_759940_CT_rpoB_P45L               | 45                 | 25                  |
| SNP_CN_759939_CA_rpoB_P45T               | 45                 | 25                  |
| SNP_CN_759939_CG_rpoB_P45A               | 45                 | 25                  |
| SNP_CN_759939_CT_rpoB_P45S               | 45                 | 25                  |
| SNP_CN_760033_CT_rpoB_P76L               | 76                 | 45                  |
| DEL_N_760050_d243GAG_rpoB                | 82                 | 51                  |
| SNP_CN_760081_AG_rpoB_D92G               | 92                 | 61                  |
| SNP_CN_760130_TG_rpoB_D108E              | 108                | 77                  |
| SNP_CN_760164_GA_rpoB_D120N              | 120                | 89                  |
| SNP_CN_760216_AC_rpoB_N137T              | 137                | 106                 |
| SNP_CN_760224_GA_rpoB_E140K              | 140                | 116                 |
| SNP_CN_760234_GA_rpoB_S143N              | 143                | 119                 |
| SNP_CN_760256_CG_rpoB_D150E              | 150                | 126                 |
| INS_F_760254_i447GGTCCTAGTCC_rpoB        | 150                | 126                 |
| SNP_CN_760270_CT_rpoB_T155I              | 155                | 131                 |
| SNP_CN_760295_CA_rpoB_N163K              | 163                | 139                 |
| SNP_CN_760305_CT_rpoB_R167C              | 167                | 143                 |
| SNP_CN_760309_TG_rpoB_V168G              | 168                | 144                 |
| SNP_CN_760315_TC_rpoB_V170A              | 170                | 146                 |
| INS_F_760316_i509TTCC_rpoB               | 170                | 146                 |
| SNP_CN_760314_GT_rpoB_V170F              | 170                | 146                 |
| SNP_CN_760321_AG_rpoB_Q172R              | 172                | 148                 |
| SNP_CN_760429_TC_rpoB_F208S              | 208                | 186                 |
| SNP_CN_760461_CT_rpoB_R219C              | 219                | 197                 |
| SNP_CN_760479_CG_rpoB_R225G              | 225                | 203                 |
| SNP_CN_760500_CA_rpoB_L232I              | 232                | 210                 |
| SNP_CN_760522_GA_rpoB_S239N              | 239                | 217                 |
| SNP_CN_760525_AG_rpoB_E240G              | 240                | 218                 |
| SNP_CN_760527_CA_rpoB_Q241K              | 241                | 219                 |
| SNP_CN_760534_TC_rpoB_V243A              | 243                | 221                 |
| SNP_CN_760555_AG_rpoB_E250G              | 250                | 228                 |
| INS_F_760570_i763CTGCTCAAGG_rpoB         | 255                | 350                 |
| SNP_CN_760616_CA_rpoB_D270E              | 270                | 365                 |
| SNP_CN_760645_CT_rpoB_P280L              | 280                | 375                 |
| SNP_CN_760663_CT_rpoB_A286V              | 286                | 381                 |
| SNP_CN_760666_AT_rpoB_Q287L              | 287                | 382                 |
| SNP_CN_760701_CT_rpoB_R299C              | 299                | 394                 |
| INS_N_760731_i924TCAACGAAGGATTCCACA_rpoB | 309                | 404                 |
| SNP_CN_760799_CG_rpoB_D331E              | 331                | 424                 |
| INS_F_760867_i1060A_rpoB_G354D           | 354                | NA                  |
| SNP_CN_760882_TG_rpoB_V359G              | 359                | NA                  |

|                                     |     |     |
|-------------------------------------|-----|-----|
| SNP_CN_760914_CT_rpoB_R370C         | 370 | 451 |
| SNP_CN_760927_CT_rpoB_T374M         | 374 | 455 |
| SNP_CN_760969_CT_rpoB_S388L         | 388 | 469 |
| SNP_CN_761002_CT_rpoB_T399I         | 399 | 480 |
| SNP_CN_761001_AG_rpoB_T399A         | 399 | 480 |
| SNP_CN_761005_CA_rpoB_T400N         | 400 | 481 |
| SNP_CN_761004_AG_rpoB_T400A         | 400 | 481 |
| SNP_CN_761004_AC_rpoB_T400P         | 400 | 481 |
| SNP_CN_761008_AG_rpoB_Q401R         | 401 | 482 |
| SNP_CN_761032_AG_rpoB_Q409R         | 409 | 490 |
| SNP_CN_761043_AG_rpoB_N413D         | 413 | 494 |
| SNP_CN_761064_GT_rpoB_A420S         | 420 | 501 |
| SNP_CN_761074_AC_rpoB_E423A         | 423 | 504 |
| SNP_CN_761089_GA_rpoB_S428N         | 428 | 509 |
| SNP_CN_761090_CG_rpoB_S428R         | 428 | 509 |
| SNP_CN_761090_CA_rpoB_S428R         | 428 | 509 |
| SNP_CN_761092_AC_rpoB_Q429P         | 429 | 510 |
| SNP_CN_761093_GT_rpoB_Q429H         | 429 | 510 |
| SNP_CN_761095_TC_rpoB_L430P         | 430 | 511 |
| SNP_CN_761095_TG_rpoB_L430R         | 430 | 511 |
| SNP_CN_761097_AC_rpoB_S431R         | 431 | 512 |
| INS_N_761098_i1291GCC_rpoB          | 431 | 512 |
| SNP_CN_761097_AG_rpoB_S431G         | 431 | 512 |
| SNP_CN_761100_CA_rpoB_Q432K         | 432 | 513 |
| SNP_CN_761100_CG_rpoB_Q432E         | 432 | 513 |
| SNP_CN_761102_AC_rpoB_Q432H         | 432 | 513 |
| SNP_CN_761101_AC_rpoB_Q432P         | 432 | 513 |
| SNP_CN_761101_AT_rpoB_Q432L         | 432 | 513 |
| INS_N_761103_i1296TTC_rpoB          | 433 | 514 |
| DEL_N_761105_d1298CATGGACCAGAA_rpoB | 433 | 514 |
| SNP_CN_761108_GT_rpoB_M434I         | 434 | 515 |
| SNP_CN_761108_GA_rpoB_M434I         | 434 | 515 |
| INS_N_761107_i1300TGG_rpoB          | 434 | 515 |
| SNP_CN_761110_AC_rpoB_D435A         | 435 | 516 |
| SNP_CN_761109_GC_rpoB_D435H         | 435 | 516 |
| SNP_CN_761110_AG_rpoB_D435G         | 435 | 516 |
| SNP_CN_761109_GT_rpoB_D435Y         | 435 | 516 |
| SNP_CN_761110_AT_rpoB_D435V         | 435 | 516 |
| SNP_CN_761109_GA_rpoB_D435N         | 435 | 516 |
| SNP_CN_761117_CA_rpoB_N437K         | 437 | 518 |
| SNP_CN_761115_AC_rpoB_N437H         | 437 | 518 |
| SNP_CN_761118_AC_rpoB_N438H         | 438 | 519 |
| SNP_CN_761121_CT_rpoB_P439S         | 439 | 520 |
| SNP_CN_761127_TC_rpoB_S441P         | 441 | 522 |
| SNP_CN_761128_CA_rpoB_S441*         | 441 | 522 |
| SNP_CN_761128_CT_rpoB_S441L         | 441 | 522 |
| SNP_CN_761134_TG_rpoB_L443W         | 443 | 524 |
| SNP_CN_761136_AC_rpoB_T444P         | 444 | 525 |
| SNP_CN_761140_AG_rpoB_H445R         | 445 | 526 |
| DEL_N_761140_d1333ACA_rpoB          | 445 | 526 |
| SNP_CN_761139_CG_rpoB_H445D         | 445 | 526 |
| SNP_CN_761139_CA_rpoB_H445N         | 445 | 526 |
| SNP_CN_761139_CT_rpoB_H445Y         | 445 | 526 |



|                                |     |     |
|--------------------------------|-----|-----|
| SNP_CN_761140_AT_rpoB_H445L    | 445 | 526 |
| SNP_CN_761141_CA_rpoB_H445Q    | 445 | 526 |
| SNP_CN_761140_AC_rpoB_H445P    | 445 | 526 |
| SNP_CN_761142_AC_rpoB_K446Q    | 446 | 527 |
| SNP_CN_761149_GA_rpoB_R448Q    | 448 | 529 |
| SNP_CN_761155_CG_rpoB_S450W    | 450 | 531 |
| SNP_CN_761154_TC_rpoB_S450P    | 450 | 531 |
| SNP_CN_761155_CA_rpoB_S450*    | 450 | 531 |
| SNP_CN_761155_CT_rpoB_S450L    | 450 | 531 |
| SNP_CN_761161_TC_rpoB_L452P    | 452 | 533 |
| SNP_CN_761160_CG_rpoB_L452V    | 452 | 533 |
| SNP_CN_761167_CG_rpoB_P454R    | 454 | 535 |
| SNP_CN_761167_CT_rpoB_P454L    | 454 | 535 |
| SNP_CN_761208_GA_rpoB_D468N    | 468 | 549 |
| SNP_CN_761241_CA_rpoB_P479T    | 479 | 560 |
| SNP_CN_761244_AG_rpoB_I480V    | 480 | 561 |
| SNP_CN_761248_AC_rpoB_E481A    | 481 | 562 |
| SNP_CN_761251_CA_rpoB_T482N    | 482 | 563 |
| SNP_CN_761253_CT_rpoB_P483S    | 483 | 564 |
| SNP_CN_761268_AG_rpoB_I488V    | 488 | 569 |
| SNP_CN_761268_AC_rpoB_I488L    | 488 | 569 |
| SNP_CN_761277_AT_rpoB_I491F    | 491 | 572 |
| SNP_CN_761277_AG_rpoB_I491V    | 491 | 572 |
| SNP_CN_761277_AC_rpoB_I491L    | 491 | 572 |
| SNP_CN_761278_TG_rpoB_I491S    | 491 | 572 |
| SNP_CN_761287_TC_rpoB_L494P    | 494 | 575 |
| SNP_CN_761292_GA_rpoB_V496M    | 496 | 577 |
| SNP_CN_761293_TG_rpoB_V496G    | 496 | 577 |
| SNP_CN_761314_TC_rpoB_F503S    | 503 | 584 |
| INS_N_761316_i1509GGG_rpoB     | 504 | 585 |
| SNP_CN_761338_GC_rpoB_R511P    | 511 | 592 |
| INS_F_761362_i1555C_rpoB_S519T | 519 | 600 |
| SNP_CN_761364_GA_rpoB_D520N    | 520 | 601 |
| SNP_CN_761407_TG_rpoB_V534G    | 534 | 615 |
| SNP_CN_761407_TC_rpoB_V534A    | 534 | 615 |
| SNP_CN_761427_CT_rpoB_P541S    | 541 | 622 |
| SNP_CN_761441_CG_rpoB_D545E    | 545 | 626 |
| SNP_CN_761476_GA_rpoB_R557H    | 557 | 638 |
| SNP_CN_761482_CT_rpoB_A559V    | 559 | NA  |
| SNP_CN_761490_GA_rpoB_V562M    | 562 | 642 |
| SNP_CN_761494_AC_rpoB_E563A    | 563 | 643 |
| SNP_CN_761502_CA_rpoB_P566T    | 566 | 646 |
| SNP_CN_761518_AC_rpoB_D571A    | 571 | 651 |
| SNP_CN_761535_CG_rpoB_P577A    | 577 | 657 |
| SNP_CN_761539_GA_rpoB_R578H    | 578 | 658 |
| SNP_CN_761547_GT_rpoB_V581L    | 581 | 661 |
| SNP_CN_761550_TC_rpoB_S582P    | 582 | 662 |
| SNP_CN_761557_CA_rpoB_A584D    | 584 | 664 |
| SNP_CN_761559_AG_rpoB_T585A    | 585 | 665 |
| SNP_CN_761664_GA_rpoB_V620M    | 620 | 700 |
| SNP_CN_761698_AG_rpoB_D631G    | 631 | 711 |
| SNP_CN_761701_CT_rpoB_A632V    | 632 | 712 |
| SNP_CN_761723_AC_rpoB_E639D    | 639 | 719 |

|                              |      |      |
|------------------------------|------|------|
| SNP_CN_761739_GA_rpoB_E645K  | 645  | 725  |
| SNP_CN_761770_TC_rpoB_M655T  | 655  | 735  |
| SNP_CN_761832_AG_rpoB_T676A  | 676  | 763  |
| SNP_CN_761851_CT_rpoB_P682L  | 682  | 769  |
| SNP_CN_761880_GA_rpoB_A692T  | 692  | 779  |
| SNP_CN_761884_GA_rpoB_G693D  | 693  | 780  |
| SNP_CN_761889_GC_rpoB_V695L  | 695  | 782  |
| SNP_CN_761905_CT_rpoB_P700L  | 700  | 787  |
| SNP_CN_761911_CT_rpoB_T702I  | 702  | 789  |
| SNP_CN_761923_AG_rpoB_E706G  | 706  | 793  |
| SNP_CN_761974_AG_rpoB_H723R  | 723  | 810  |
| INS_F_761980_i2173GCTC_rpoB  | 725  | 812  |
| SNP_CN_761998_TC_rpoB_L731P  | 731  | 818  |
| SNP_CN_762027_CT_rpoB_L741F  | 741  | 828  |
| SNP_CN_762042_AG_rpoB_I746V  | 746  | 833  |
| INS_F_762068_i2261ACCT_rpoB  | 754  | 841  |
| SNP_CN_762089_GC_rpoB_E761D  | 761  | 848  |
| SNP_CN_762201_AC_rpoB_K799Q  | 799  | 886  |
| SNP_CN_762256_CT_rpoB_A817V  | 817  | 904  |
| SNP_CN_762277_GT_rpoB_R824L  | 824  | 911  |
| SNP_CN_762279_GT_rpoB_E825*  | 825  | 912  |
| SNP_CN_762285_CT_rpoB_R827C  | 827  | 914  |
| SNP_CN_762300_AG_rpoB_K832E  | 832  | 919  |
| SNP_CN_762310_AC_rpoB_H835P  | 835  | 922  |
| SNP_CN_762310_AG_rpoB_H835R  | 835  | 922  |
| SNP_CN_762312_GA_rpoB_G836S  | 836  | 923  |
| SNP_CN_762362_GC_rpoB_E852D  | 852  | 1005 |
| SNP_CN_762391_TG_rpoB_L862R  | 862  | 1049 |
| SNP_CN_762418_GA_rpoB_R871H  | 871  | 1058 |
| SNP_CN_762427_CA_rpoB_S874Y  | 874  | 1061 |
| SNP_CN_762477_AG_rpoB_K891E  | 891  | 1078 |
| SNP_CN_762492_GA_rpoB_E896K  | 896  | 1083 |
| SNP_CN_762564_AG_rpoB_M920V  | 920  | 1107 |
| SNP_CN_762612_AC_rpoB_S936R  | 936  | 1123 |
| SNP_CN_762636_AG_rpoB_K944E  | 944  | 1163 |
| SNP_CN_762640_GA_rpoB_G945E  | 945  | 1164 |
| SNP_CN_762676_TC_rpoB_L957P  | 957  | 1176 |
| SNP_CN_762675_CG_rpoB_L957V  | 957  | 1176 |
| SNP_CN_762715_TC_rpoB_V970A  | 970  | 1186 |
| SNP_CN_762717_TC_rpoB_F971L  | 971  | 1187 |
| SNP_CN_762745_AG_rpoB_Q980R  | 980  | 1196 |
| SNP_CN_762783_GA_rpoB_D993N  | 993  | NA   |
| SNP_CN_762790_TC_rpoB_L995P  | 995  | NA   |
| SNP_CN_762815_GC_rpoB_M1003I | 1003 | 1211 |
| SNP_CN_762833_CG_rpoB_S1009R | 1009 | 1217 |
| SNP_CN_762841_CT_rpoB_P1012L | 1012 | 1220 |
| SNP_CN_762840_CA_rpoB_P1012T | 1012 | 1220 |
| SNP_CN_762910_TC_rpoB_I1035T | 1035 | 1243 |
| SNP_CN_762911_CG_rpoB_I1035M | 1035 | 1243 |
| SNP_CN_762928_GT_rpoB_G1041V | 1041 | 1249 |
| SNP_CN_762941_GA_rpoB_M1045I | 1045 | 1253 |
| SNP_CN_762951_CT_rpoB_Q1049* | 1049 | 1257 |
| SNP_CN_763005_TG_rpoB_C1067G | 1067 | 1275 |

|                              |      |      |
|------------------------------|------|------|
| INS_F_763041_i3234GGGT_rpoB  | 1079 | 1287 |
| DEL_F_763043_d3236GCAG_rpoB  | 1079 | 1287 |
| SNP_CN_763059_AG_rpoB_I1085V | 1085 | 1293 |
| SNP_CN_763075_CT_rpoB_T1090I | 1090 | 1298 |
| SNP_CN_763090_AG_rpoB_K1095R | 1095 | 1303 |
| SNP_CN_763102_CA_rpoB_A1099E | 1099 | 1307 |
| SNP_CN_763216_CT_rpoB_A1137V | 1137 | NA   |
| SNP_CN_763258_GA_rpoB_R1151Q | 1151 | NA   |
| SNP_CN_763300_CT_rpoB_S1165F | 1165 | NA   |
| SNP_CN_763302_GA_rpoB_A1166T | 1166 | NA   |
| SNP_CN_763303_CT_rpoB_A1166V | 1166 | NA   |
